# Supplementary material for: Survival-Associated Alternative Splicing Events in Pan-Renal Cell Carcinoma
Source: Front Oncol. 2019 Nov 27;9:1317. doi: 10.3389/fonc.2019.01317 (PMC6902018; doi:10.3389/fonc.2019.01317)
Supplement: Supplementary file 1 [file Table_1.xlsx]

## Sheet: Sheet1
Supplementary table 1 The results of survival analysis
Type	Events	ID	Coef	95% CI lower	95% CI upper	P value
KIRC	C4orf19-AT-5	69001	-2.87347	-3.5196	-2.22734	0
KIRC	EPC2-AT-15	55538	-6.28395	-7.77195	-4.79595	2.22045e-16
KIRC	SCP2-ES-12	3045	2.83677	2.11641	3.55713	1.17684e-14
KIRC	FAM120C-AT-17	89238	-3.43325	-4.30621	-2.56028	1.26565e-14
KIRC	PCMTD1-AT-8	83807	-14.8514	-18.6954	-11.0075	3.66374e-14
KIRC	ZNF814-AT-4.2	52355	8.43675	6.23561	10.6379	5.81757e-14
KIRC	INPP4B-AT-35	70691	-7.02549	-8.86688	-5.18411	7.54952e-14
KIRC	FAM72A-AT-6	9578	3.84899	2.81681	4.88116	2.69784e-13
KIRC	HAGH-ES-6	33146	-27.7735	-35.3068	-20.2401	4.98046e-13
KIRC	TAF1D-RI-12.4	18313	3.93952	2.87055	5.0085	5.08038e-13
KIRC	ALDH6A1-AP-1	28366	-2.72021	-3.45953	-1.98089	5.54001e-13
KIRC	CEP68-AT-7	53777	-8.91784	-11.3499	-6.48576	6.63691e-13
KIRC	GLS-AT-20	56589	-3.44635	-4.38698	-2.50572	6.91669e-13
KIRC	RPS24-AA-5.1	12297	-3.21728	-4.10147	-2.3331	9.91207e-13
KIRC	ERBB3-AP-1.1	22351	-2.35196	-3.00609	-1.69783	1.82565e-12
KIRC	TRAPPC3-ES-4	1752	9.64192	6.95499	12.3288	2.01794e-12
KIRC	GIT2-AA-18.1	24375	2.32096	1.67297	2.96895	2.21601e-12
KIRC	NIPAL3-AT-15	1111	-3.91071	-5.00649	-2.81494	2.65366e-12
KIRC	FBXO3-RI-12.2:12.3	14929	2.61259	1.87818	3.34699	3.11529e-12
KIRC	SIRT5-AT-13	75391	-6.94239	-8.91613	-4.96866	5.4261e-12
KIRC	MCCC1-AP-2	67769	-2.17412	-2.79379	-1.55446	6.12932e-12
KIRC	SRSF1-RI-3.6	42630	-3.31877	-4.26946	-2.36807	7.8082e-12
KIRC	PSMF1-AA-8.1	58475	7.54115	5.3728	9.7095	9.33342e-12
KIRC	PPM1A-AT-9	27776	-7.83126	-10.0855	-5.57702	9.83347e-12
KIRC	ARL6IP4-RI-5.2	25024	11.54	8.20813	14.8718	1.13365e-11
KIRC	ZNF836-AT-5	51413	-2.3064	-2.9728	-1.64001	1.17353e-11
KIRC	HNRNPA1-RI-11.3	22144	3.60096	2.55312	4.6488	1.63332e-11
KIRC	MKL2-AT-19	34070	-7.52131	-9.71662	-5.326	1.88056e-11
KIRC	C16orf13-ES-0.085462962962963	32919	-9.70613	-12.5441	-6.86821	2.03655e-11
KIRC	APOLD1-AT-4	20516	-2.15568	-2.78674	-1.52462	2.15414e-11
KIRC	FAM175A-AT-12	69800	-2.81178	-3.63494	-1.98861	2.15843e-11
KIRC	MPZL2-AT-6	18983	-5.6607	-7.32017	-4.00123	2.29778e-11
KIRC	QARS-ES-10	64826	-26.9452	-34.8575	-19.033	2.47775e-11
KIRC	HMGB1-AA-7.1:7.2	25570	16.4722	11.5949	21.3494	3.60521e-11
KIRC	TMEM201-AT-6.2	565	-3.8424	-4.98405	-2.70075	4.20819e-11
KIRC	SIRT2-ES-6	49711	2.69804	1.88908	3.50699	6.27987e-11
KIRC	MLH3-ES-7	28470	3.35357	2.34735	4.35979	6.47951e-11
KIRC	VKORC1-ES-4.2	36233	-28.2762	-36.8128	-19.7395	8.46723e-11
KIRC	RCAN1-AP-5	60494	-2.15457	-2.80688	-1.50226	9.55978e-11
KIRC	KLHL7-AT-14	78950	-4.26523	-5.55707	-2.97339	9.72538e-11
KIRC	SLC3A1-AP-1	53420	-1.9457	-2.53546	-1.35594	1.00489e-10
KIRC	DIAPH2-AT-29	89594	-2.73696	-3.57052	-1.90339	1.23162e-10
KIRC	USHBP1-RI-3.2	48248	2.60461	1.81127	3.39795	1.23692e-10
KIRC	TCAIM-ES-8	64361	2.18878	1.52085	2.8567	1.33839e-10
KIRC	GLOD4-ES-3	38275	2.11215	1.46666	2.75765	1.42426e-10
KIRC	PLEKHB2-AP-1	55368	-2.09604	-2.73678	-1.45531	1.43973e-10
KIRC	RPS24-ES-5.1:5.2	12295	-2.40902	-3.14731	-1.67074	1.60162e-10
KIRC	PIGG-AT-15	68356	-8.98491	-11.7571	-6.21269	2.12067e-10
KIRC	NUP62-RI-1.3:1.4	51127	3.17323	2.19341	4.15305	2.18816e-10
KIRC	DDX19A-ES-2	37382	2.3109	1.59501	3.0268	2.50389e-10
KIRC	YBX3-ES-6	20481	8.86428	6.11367	11.6149	2.67893e-10
KIRC	FOSL2-AA-6.1	53060	6.27977	4.31912	8.24043	3.43953e-10
KIRC	SYMPK-AP-2.1	50530	2.27258	1.56125	2.98392	3.8076e-10
KIRC	FLI1-AP-3	19413	-2.9744	-3.90917	-2.03963	4.4733e-10
KIRC	ZNF141-AT-4.2	68345	-2.17697	-2.86146	-1.49248	4.56144e-10
KIRC	MCM9-AT-13	77355	-3.72045	-4.89204	-2.54886	4.84705e-10
KIRC	CALCOCO2-ES-3	42231	2.12656	1.4553	2.79782	5.32566e-10
KIRC	DCTN5-ES-4	35626	2.70234	1.84701	3.55767	5.92832e-10
KIRC	RNF141-AT-7	14356	-20.265	-26.6928	-13.8372	6.44291e-10
KIRC	GNB5-AT-13	30638	-17.9146	-23.5984	-12.2307	6.51411e-10
KIRC	SMIM7-RI-7.2:7.3	48188	-20.4098	-26.8916	-13.928	6.76285e-10
KIRC	RANBP3-ES-2	47007	2.65439	1.80998	3.49881	7.2244e-10
KIRC	H2AFV-AT-6	79572	-4.90532	-6.46826	-3.34238	7.68044e-10
KIRC	OAZ1-AP-1	46592	-113.191	-149.257	-77.1254	7.68636e-10
KIRC	CIRBP-RI-9.4	46432	3.50019	2.38371	4.61666	8.01901e-10
KIRC	ZNF677-AT-6.2	51701	3.60134	2.45251	4.75018	8.04464e-10
KIRC	GRK6-AT-17.2	74764	-5.81127	-7.66792	-3.95462	8.53506e-10
KIRC	ANKRD29-AT-11	44841	-3.71782	-4.90583	-2.52981	8.59112e-10
KIRC	UQCRB-AA-6.1:6.2:6.3	84612	35.7106	24.258	47.1633	9.87682e-10
KIRC	SIAH1-AP-8.1	36339	2.21679	1.50543	2.92815	1.01031e-09
KIRC	SEC23A-AP-7	27345	2.30731	1.5668	3.04783	1.01596e-09
KIRC	RBP7-ES-2	592	2.14863	1.45899	2.83827	1.01894e-09
KIRC	TPM1-ES-9	30988	6.43538	4.36765	8.50311	1.06076e-09
KIRC	VPS28-RI-3.4:3.5:3.6	85608	12.6525	8.57784	16.7271	1.15747e-09
KIRC	TACC2-ES-12	13344	2.3808	1.61385	3.14774	1.17027e-09
KIRC	RRM2B-ES-2	84774	1.72182	1.1667	2.27695	1.20789e-09
KIRC	SLC39A13-RI-6.12	15738	-40.6965	-53.8227	-27.5703	1.22702e-09
KIRC	AIFM1-AP-1	90067	-1.9105	-2.52834	-1.29266	1.35602e-09
KIRC	ZNF169-AT-4.3	86926	4.90822	3.32011	6.49633	1.38283e-09
KIRC	GTF2H1-AP-1	14599	-2.17459	-2.8783	-1.47087	1.39026e-09
KIRC	QSOX1-RI-12.2	9130	-3.65808	-4.8444	-2.47175	1.50685e-09
KIRC	PDE4DIP-AT-29.2	4411	-3.75663	-4.97596	-2.53729	1.55629e-09
KIRC	PCYOX1-AP-1	53879	2.52037	1.70152	3.33922	1.61297e-09
KIRC	PFKM-ES-8	21429	2.31631	1.56248	3.07014	1.7183e-09
KIRC	MAT2A-AT-10	54280	-5.73225	-7.59827	-3.86623	1.73519e-09
KIRC	UQCR10-AD-1.2	61665	16.8445	11.3511	22.338	1.85766e-09
KIRC	ZNF512-AT-15.2	53020	7.25405	4.88461	9.62349	1.96779e-09
KIRC	SNED1-AT-32	58307	-9.31921	-12.3634	-6.27498	1.97335e-09
KIRC	ADCK3-AP-1	10036	1.89985	1.27804	2.52165	2.11885e-09
KIRC	LGALS8-AT-14	10381	-11.1383	-14.7862	-7.49044	2.17046e-09
KIRC	PRKAB1-AP-2	24704	2.30628	1.54943	3.06314	2.33796e-09
KIRC	VPS28-RI-3.1	85603	8.2872	5.56568	11.0087	2.39878e-09
KIRC	MTAP-AT-8	85996	4.11981	2.76449	5.47513	2.55744e-09
KIRC	ALG13-AT-4	89905	-2.93109	-3.89628	-1.9659	2.64818e-09
KIRC	SH3BP1-AT-21	62132	-2.58597	-3.43795	-1.734	2.69753e-09
KIRC	GIT2-ES-17.1:17.2:18.1	24385	2.68915	1.79928	3.57901	3.16195e-09
KIRC	ASPH-AT-33	83970	-4.17941	-5.56347	-2.79536	3.24909e-09
KIRC	DYNC2LI1-AA-8.1	53400	2.38422	1.59431	3.17413	3.30189e-09
KIRC	RPS9-RI-4.4	51816	2.99463	2.00193	3.98734	3.36933e-09
KIRC	ACTR10-ES-3	27682	2.03438	1.3585	2.71026	3.64768e-09
KIRC	ABCE1-ES-14	70753	2.27966	1.52187	3.03745	3.72089e-09
KIRC	ZNF91-AT-4	48815	-3.04512	-4.0581	-2.03213	3.81964e-09
KIRC	VPS28-RI-3.8	85604	5.50411	3.67144	7.33677	3.94622e-09
KIRC	TM4SF1-RI-3.2	67223	13.105	8.73459	17.4754	4.17548e-09
KIRC	EPB41L5-AT-26	55146	3.28501	2.18801	4.382	4.37868e-09
KIRC	PMPCB-AT-12.3	81174	11.8662	7.8992	15.8331	4.55253e-09
KIRC	HEXB-AP-2	72500	-2.95896	-3.94852	-1.9694	4.61152e-09
KIRC	FLT1-AT-35	25558	-2.50248	-3.33941	-1.66555	4.61638e-09
KIRC	PSME1-RI-10.2:10.3	26852	26.2966	17.4944	35.0987	4.75762e-09
KIRC	TMLHE-AT-9	90682	-4.71276	-6.29131	-3.1342	4.87342e-09
KIRC	GOSR2-AT-6.2	42044	-6.97666	-9.31849	-4.63483	5.25096e-09
KIRC	FIS1-ES-3	81054	-56.2873	-75.1923	-37.3824	5.36102e-09
KIRC	ZNF264-AT-5	52207	-1.83319	-2.44972	-1.21665	5.61957e-09
KIRC	HARS-AP-3.1	73720	2.31774	1.53456	3.10093	6.6209e-09
KIRC	HBS1L-AP-1	77782	-1.94114	-2.59713	-1.28514	6.6438e-09
KIRC	PACRGL-AT-13.2	68877	-2.53126	-3.38681	-1.67571	6.67892e-09
KIRC	BCL7B-ES-2	79959	2.34822	1.55416	3.14228	6.78931e-09
KIRC	NDUFS2-RI-14.2	8597	3.65918	2.41974	4.89863	7.19364e-09
KIRC	GGCT-AP-3	79122	-3.15654	-4.22578	-2.08729	7.20599e-09
KIRC	KLHL21-RI-4.2:4.3	482	1.89277	1.25087	2.53468	7.50201e-09
KIRC	THAP2-AT-4	23409	-2.45544	-3.28878	-1.62209	7.69655e-09
KIRC	BOD1L1-ES-2	68797	1.84068	1.2149	2.46647	8.1635e-09
KIRC	MTMR10-RI-18.2	29789	2.49217	1.64326	3.34108	8.71798e-09
KIRC	ATL2-ES-3	53255	1.96182	1.29324	2.6304	8.86615e-09
KIRC	CNST-AT-11	10494	-7.97372	-10.6919	-5.25556	8.94756e-09
KIRC	RIMKLB-AT-8.2	20202	-2.42821	-3.25642	-1.6	9.11898e-09
KIRC	TP53BP2-ES-3	9930	2.27853	1.50127	3.05578	9.15702e-09
KIRC	RGS3-AT-33	87294	8.09657	5.33153	10.8616	9.51564e-09
KIRC	DCTN6-ES-3	83284	2.45725	1.61803	3.29646	9.53241e-09
KIRC	CRCP-ES-4	79873	2.04093	1.34358	2.73828	9.68115e-09
KIRC	DENND5B-AT-25	20994	-8.81914	-11.8334	-5.80491	9.77877e-09
KIRC	PSMA1-AT-13.2	14474	7.72314	5.08292	10.3634	9.85242e-09
KIRC	PSME3-AP-4	41144	-2.23239	-2.99626	-1.46852	1.01653e-08
KIRC	ZNF700-AP-2.1	47760	2.37623	1.56148	3.19098	1.08894e-08
KIRC	CHM-AT-16	89563	-9.75707	-13.1065	-6.40769	1.13265e-08
KIRC	SPOP-AP-1	42302	-1.82272	-2.44887	-1.19658	1.16018e-08
KIRC	EEF1B2-ES-3	57139	21.6119	14.186	29.0378	1.16918e-08
KIRC	PMPCB-RI-12.2	81177	3.68307	2.41721	4.94892	1.17978e-08
KIRC	GFOD1-AT-4	75388	-5.79296	-7.78432	-3.80159	1.18683e-08
KIRC	PCGF3-RI-5.2:5.3	68405	2.17696	1.42833	2.92558	1.20178e-08
KIRC	DDRGK1-AT-9	58576	-5.59788	-7.52322	-3.67254	1.20824e-08
KIRC	SAMHD1-AT-17	59330	-16.3053	-21.9188	-10.6919	1.24764e-08
KIRC	CAPRIN1-AT-20	14944	-14.0553	-18.8954	-9.21517	1.25876e-08
KIRC	NME4-AT-8.2	32877	7.58692	4.97333	10.2005	1.27387e-08
KIRC	INO80C-ES-3:4.1:4.2	45189	2.35313	1.54225	3.16401	1.2876e-08
KIRC	EIF2A-ES-3	67287	1.90876	1.25071	2.56681	1.30714e-08
KIRC	ANGPT1-AP-1	84860	-2.00693	-2.69897	-1.3149	1.31607e-08
KIRC	LCORL-AT-9	68866	4.10595	2.68935	5.52256	1.34025e-08
KIRC	TGOLN2-AA-4.1:4.2	54194	4.02962	2.63673	5.42251	1.42664e-08
KIRC	PSMG2-AT-8	44701	-23.2913	-31.3467	-15.2358	1.45335e-08
KIRC	JAM2-AT-12	60253	-2.88693	-3.88608	-1.88779	1.48635e-08
KIRC	PNKD-AT-13	57463	2.70825	1.76959	3.64691	1.55895e-08
KIRC	CYYR1-AT-6.2	60291	-22.1239	-29.7922	-14.4556	1.5613e-08
KIRC	SYNPO2-AT-4.2	70454	-3.02164	-4.07017	-1.97311	1.62127e-08
KIRC	ZBTB43-AP-3.1	87600	2.08347	1.35991	2.80702	1.66454e-08
KIRC	RPL35A-AD-3.2	68338	239.671	156.363	322.978	1.71332e-08
KIRC	ZNF687-ES-2	7588	2.08243	1.35787	2.80698	1.76988e-08
KIRC	FKBP8-ES-4:5:6.1:6.2	48448	-197.233	-265.938	-128.528	1.83898e-08
KIRC	ARMCX4-AT-10.2	89646	-2.24976	-3.03386	-1.46566	1.87059e-08
KIRC	UBA1-AP-2	88909	-1.98408	-2.67586	-1.29231	1.89467e-08
KIRC	PLS3-ES-5	89927	1.86135	1.21218	2.51051	1.91205e-08
KIRC	TNFSF13-AP-2.1	38970	-4.63413	-6.25071	-3.01755	1.92647e-08
KIRC	RPL15-AP-1.1	63727	-13.7495	-18.5495	-8.9496	1.97289e-08
KIRC	JTB-RI-2.2	7776	4.89771	3.18783	6.6076	1.97658e-08
KIRC	STAU1-ES-2	59743	2.33846	1.52188	3.15504	1.99089e-08
KIRC	NDUFB4-RI-2.2	66373	10.2794	6.68601	13.8727	2.06136e-08
KIRC	HDAC4-AT-29	58232	-4.04733	-5.46218	-2.63248	2.06218e-08
KIRC	SLC38A2-AP-1	21329	-3.37605	-4.55649	-2.1956	2.07705e-08
KIRC	FIBP-ES-4	16939	-33.1878	-44.7944	-21.5812	2.091e-08
KIRC	EIF4E2-AT-9	57999	-3.7275	-5.03195	-2.42305	2.13545e-08
KIRC	COX19-AT-3	78557	3.0974	2.01177	4.18304	2.24556e-08
KIRC	TTC8-ES-6	28787	2.10773	1.36826	2.84719	2.31601e-08
KIRC	MTFR1L-AP-4.1	1196	2.18605	1.41889	2.95321	2.33746e-08
KIRC	NGDN-RI-10.2	26756	4.95073	3.21193	6.68954	2.39942e-08
KIRC	COX5A-ES-3	31814	-55.735	-75.365	-36.105	2.62325e-08
KIRC	SUOX-ES-3	22340	3.88766	2.51796	5.25737	2.65154e-08
KIRC	NUP62-AD-1.3:1.4:1.5	51124	3.03268	1.96218	4.10318	2.81658e-08
KIRC	UPK3B-AT-8	80182	4.27933	2.7679	5.79076	2.86865e-08
KIRC	MCFD2-ES-5	53478	1.9468	1.25904	2.63455	2.89e-08
KIRC	STAT1-AT-26	56594	-3.80604	-5.15082	-2.46126	2.90356e-08
KIRC	ANKRD10-AT-8	26271	-2.98809	-4.04479	-1.9314	2.98485e-08
KIRC	MAPK1-AT-9	61256	-4.11774	-5.57404	-2.66145	2.99237e-08
KIRC	KLF3-AT-6	69021	-5.1915	-7.0278	-3.35519	3.00582e-08
KIRC	ZDHHC24-AT-3	17064	-5.38397	-7.28866	-3.47928	3.02129e-08
KIRC	BTF3L4-AT-7	2993	-9.76905	-13.2262	-6.31188	3.05362e-08
KIRC	TUBGCP3-AT-23	26303	-12.6266	-17.0966	-8.15657	3.08821e-08
KIRC	TECPR2-AT-20	29415	-6.58522	-8.91694	-4.2535	3.1067e-08
KIRC	DDX6-AT-15	19049	-20.6709	-27.9918	-13.35	3.12876e-08
KIRC	NUMB-AP-8.1	28287	2.10042	1.35631	2.84453	3.15783e-08
KIRC	DYNC2LI1-ES-2	53403	2.20957	1.42583	2.99332	3.28337e-08
KIRC	SCAF11-AP-2	21316	-1.95578	-2.64978	-1.26179	3.32379e-08
KIRC	USP33-ES-2	3534	4.54448	2.92967	6.15928	3.47105e-08
KIRC	RNASEK-AP-1	38815	-13.7205	-18.6009	-8.84006	3.58622e-08
KIRC	NSL1-AT-7	9742	-5.23344	-7.0962	-3.37068	3.65979e-08
KIRC	SUV420H1-AT-13	17294	-2.8433	-3.85723	-1.82937	3.8808e-08
KIRC	KCTD6-AP-3.1	65458	1.97288	1.26928	2.67647	3.89046e-08
KIRC	RAB3GAP1-ES-0.170138888888889	55433	2.1477	1.38154	2.91387	3.92611e-08
KIRC	RBP5-AT-5	20077	-6.47288	-8.7839	-4.16185	4.02848e-08
KIRC	PPIG-AT-14	55871	-15.3259	-20.8265	-9.82528	4.7381e-08
KIRC	EIF3M-AT-10	14846	-9.83449	-13.3651	-6.30392	4.77382e-08
KIRC	RBM7-RI-4.3	18823	1.92852	1.23552	2.62152	4.9171e-08
KIRC	ZNF320-AT-9	51638	6.40862	4.1056	8.71164	4.92486e-08
KIRC	IREB2-RI-8.2	32090	1.65039	1.05712	2.24367	4.97198e-08
KIRC	ZNF783-AT-7	82183	-2.40278	-3.26672	-1.53885	5.00746e-08
KIRC	KMT2E-AT-28.3	81267	-9.28643	-12.628	-5.94484	5.12775e-08
KIRC	OSGEP-AP-4.1	26441	2.24458	1.43585	3.05331	5.33602e-08
KIRC	BTNL9-AT-13	75037	-2.22793	-3.03113	-1.42472	5.43353e-08
KIRC	PPP1CC-RI-6.2	24502	-22.2461	-30.2807	-14.2115	5.73979e-08
KIRC	GNAI2-AP-2	64970	-1.99385	-2.71499	-1.2727	5.99497e-08
KIRC	RPS20-RI-2.2	83887	70.7402	45.1271	96.3533	6.19174e-08
KIRC	CLYBL-RI-9.2	26188	-4.16177	-5.67023	-2.6533	6.39414e-08
KIRC	PTCD2-AD-1.2	72469	1.8283	1.16552	2.49109	6.42318e-08
KIRC	METTL15-AT-12.3	14782	-11.8567	-16.1578	-7.55557	6.55583e-08
KIRC	SLC25A37-AD-2.2	83083	3.36791	2.1456	4.59021	6.64824e-08
KIRC	PTTG1IP-AP-1	60839	-2.9136	-3.97143	-1.85578	6.72442e-08
KIRC	CFLAR-ES-10	56799	2.01652	1.2843	2.74873	6.74919e-08
KIRC	TARDBP-ES-3	635	1.95105	1.24207	2.66003	6.90425e-08
KIRC	FBXO4-ES-3	71889	2.62597	1.67165	3.58028	6.92131e-08
KIRC	RPS21-RI-3.2	60078	61.3839	39.047	83.7207	7.19733e-08
KIRC	ATG16L2-AT-17	17649	4.64958	2.95765	6.34151	7.19779e-08
KIRC	MARS-AT-21.2	22593	4.61805	2.93573	6.30038	7.4406e-08
KIRC	AZI2-AT-10	63794	-2.63423	-3.59446	-1.674	7.58037e-08
KIRC	ZNF174-AT-3	33572	-4.18688	-5.71586	-2.6579	8.0026e-08
KIRC	RPL3-AA-4.1	62294	37.2219	23.6219	50.8219	8.12948e-08
KIRC	SDHA-ES-0.551388888888889	71419	-42.7048	-58.3083	-27.1013	8.13204e-08
KIRC	NDUFC1-AP-2.1	70617	-2.19854	-3.00243	-1.39465	8.31027e-08
KIRC	HYI-AT-9	2182	-8.50475	-11.6162	-5.39334	8.44431e-08
KIRC	NRSN1-AT-5	75503	-4.65161	-6.35375	-2.94948	8.49867e-08
KIRC	RBM48-RI-4.2	80441	1.90238	1.20513	2.59963	8.91394e-08
KIRC	DDX17-AP-1	62238	-2.26195	-3.09138	-1.43251	9.04129e-08
KIRC	ZCCHC9-RI-1.3:1.4	72663	1.93091	1.22262	2.6392	9.13436e-08
KIRC	MKNK2-AA-14.1	46570	-2.77347	-3.7912	-1.75573	9.23387e-08
KIRC	SNX11-ES-5	42174	2.73222	1.72815	3.73629	9.64167e-08
KIRC	MTA3-ES-7	53371	1.85137	1.17064	2.5321	9.7963e-08
KIRC	ZNF614-AT-6.2	51396	-2.38663	-3.26418	-1.50908	9.79878e-08
KIRC	YIF1A-ES-7	17008	-14.0318	-19.1974	-8.86623	1.01487e-07
KIRC	FKBP9-RI-12.2	79203	-49.1342	-67.2243	-31.0441	1.01829e-07
KIRC	TET2-AT-11	70187	-4.62927	-6.3369	-2.92165	1.07625e-07
KIRC	TTC22-AT-8	3174	-9.40913	-12.8817	-5.93657	1.09233e-07
KIRC	KIAA0907-RI-13.2	8136	2.18568	1.37869	2.99268	1.10592e-07
KIRC	ACADM-AT-14	3483	-14.6649	-20.0861	-9.2438	1.14552e-07
KIRC	MTIF2-ES-4	53607	2.21404	1.39516	3.03292	1.16294e-07
KIRC	CENPN-AT-12	37739	-2.39643	-3.28376	-1.5091	1.2012e-07
KIRC	PIGQ-AT-14	32902	-11.0881	-15.1953	-6.98083	1.2151e-07
KIRC	TBC1D5-AP-2	63658	1.86033	1.17101	2.54965	1.2262e-07
KIRC	TNFRSF10C-AT-8	83064	-1.69009	-2.31661	-1.06357	1.2422e-07
KIRC	IDS-AT-14	90291	-3.8168	-5.23209	-2.4015	1.25244e-07
KIRC	CCND1-ES-0.0854166666666667	17365	-120.294	-164.961	-75.6284	1.30201e-07
KIRC	DHX8-AT-23	41706	-3.46013	-4.74556	-2.17471	1.32125e-07
KIRC	MED1-AT-18.2	40644	-3.10196	-4.25442	-1.9495	1.3245e-07
KIRC	TIMP2-AD-5.2	43923	20.287	12.7477	27.8263	1.3353e-07
KIRC	RPS21-RI-3.4	60073	17.2682	10.85	23.6864	1.3401e-07
KIRC	CCPG1-RI-9.4	30726	3.06273	1.92204	4.20343	1.42143e-07
KIRC	NMNAT1-AT-6.3	590	-4.38422	-6.0185	-2.74993	1.45709e-07
KIRC	AMACR-AT-7.3	71697	-22.8132	-31.3178	-14.3085	1.46063e-07
KIRC	EIF3M-RI-6.2	14849	9.78396	6.13521	13.4327	1.47578e-07
KIRC	SLC25A3-ME-2.1:2.2|3	239473	13.0145	8.1585	17.8705	1.49753e-07
KIRC	CYFIP2-AT-37	74329	-12.3592	-16.971	-7.74738	1.50051e-07
KIRC	C11orf57-RI-4.2	18723	2.0512	1.28541	2.81698	1.52198e-07
KIRC	THAP6-AT-5	69530	-2.87122	-3.94336	-1.79908	1.53075e-07
KIRC	DUSP18-AT-2.5	61794	-3.48428	-4.78545	-2.18311	1.53423e-07
KIRC	ARHGAP28-AT-22	44559	-5.71661	-7.86043	-3.57279	1.72895e-07
KIRC	UBC-RI-1.4	25165	5.36228	3.3513	7.37327	1.72996e-07
KIRC	NFS1-ES-7	59219	1.95491	1.22067	2.68916	1.80509e-07
KIRC	EFEMP2-RI-11.2	16931	-4.88183	-6.71579	-3.04787	1.81609e-07
KIRC	KANSL1L-AT-16	57260	-11.4632	-15.7793	-7.14722	1.93352e-07
KIRC	RBM6-AT-20	64934	3.92408	2.44653	5.40164	1.93735e-07
KIRC	ARIH2-ES-3	64787	4.08066	2.5423	5.61901	2.00347e-07
KIRC	C6orf141-AT-5	76449	-2.00697	-2.76446	-1.24949	2.06943e-07
KIRC	ASB8-AT-5.4	21432	-19.0841	-26.2903	-11.8779	2.09676e-07
KIRC	KHK-ME-3|4	52929	1.42152	0.884655	1.95839	2.10722e-07
KIRC	RUNX1-AT-11	60505	-5.90801	-8.13993	-3.67608	2.12436e-07
KIRC	SEC22A-AP-2.1	66462	1.83249	1.14016	2.52482	2.12863e-07
KIRC	FGD6-AT-21	23744	-7.10892	-9.7952	-4.42265	2.13911e-07
KIRC	NDRG1-ES-4	85237	-99.9759	-137.779	-62.1727	2.17869e-07
KIRC	PIK3C3-AT-25	45317	-2.7404	-3.77673	-1.70408	2.18554e-07
KIRC	CCL28-AT-5.2	71947	-2.99566	-4.12883	-1.8625	2.20215e-07
KIRC	STAMBP-AT-11.2	53987	-3.04214	-4.19344	-1.89085	2.23137e-07
KIRC	OS9-AD-5.2:5.3	22701	-48.8114	-67.2966	-30.3261	2.27429e-07
KIRC	WNT9B-AT-5	42039	4.43886	2.75604	6.12168	2.34223e-07
KIRC	PHB2-RI-5.2	20046	7.20946	4.47613	9.94279	2.34575e-07
KIRC	HP1BP3-AP-7.1	937	2.11501	1.3127	2.91732	2.38176e-07
KIRC	RFX5-ES-7	7609	1.77919	1.10393	2.45445	2.41524e-07
KIRC	NFE2L2-AT-9	56131	-32.1814	-44.4153	-19.9475	2.52662e-07
KIRC	CELF1-AA-18.1:18.2	15763	3.28856	2.03625	4.54088	2.64928e-07
KIRC	TRIP4-AT-13	31118	-8.43206	-11.646	-5.21817	2.71516e-07
KIRC	TNKS-AP-1.1	82595	-1.9416	-2.68188	-1.20132	2.73937e-07
KIRC	NISCH-AT-22	65221	5.24432	3.24466	7.24398	2.74424e-07
KIRC	NPEPPS-AA-14.1	42079	10.0635	6.22602	13.9011	2.74997e-07
KIRC	ZNF568-AT-7	49433	-3.22101	-4.44938	-1.99264	2.75663e-07
KIRC	MEF2BNB-AT-6.2	48602	-5.9692	-8.24907	-3.68932	2.87283e-07
KIRC	DNAJA3-ES-2	33726	1.83917	1.13592	2.54243	2.96347e-07
KIRC	AKAP10-ES-3	39785	1.81702	1.12213	2.51192	2.97618e-07
KIRC	SPG21-AP-4.1	31149	2.15735	1.33214	2.98257	2.99264e-07
KIRC	C20orf96-AT-11	58438	-3.2491	-4.49245	-2.00575	3.02702e-07
KIRC	DIABLO-RI-2.2	24937	2.56553	1.58369	3.54737	3.03382e-07
KIRC	EMC10-ES-7	51201	-4.75198	-6.57095	-2.93301	3.05007e-07
KIRC	HYPK-RI-4.2	30320	14.3806	8.87464	19.8867	3.07067e-07
KIRC	INO80C-ES-3:4.1:4.2:5.1:5.2:6:7	45176	3.89177	2.40052	5.38302	3.13777e-07
KIRC	EPS15L1-AP-7.1	48152	1.98803	1.22625	2.74981	3.13864e-07
KIRC	ZNF83-AP-9.1	51474	2.62252	1.61708	3.62797	3.18418e-07
KIRC	TVP23B-AP-1	39649	-1.73602	-2.40322	-1.06881	3.40259e-07
KIRC	TMEM8B-AT-16	86321	-2.69404	-3.72971	-1.65838	3.42562e-07
KIRC	GABARAP-RI-1.2:1.3:1.4	38871	43.4009	26.7148	60.0869	3.43404e-07
KIRC	PDHB-AA-8.1	65454	23.7529	14.6047	32.9011	3.60015e-07
KIRC	USP38-AT-10	70697	-6.24432	-8.64938	-3.83926	3.60525e-07
KIRC	MAPKAPK5-AT-17	24541	-16.2725	-22.547	-9.99794	3.71496e-07
KIRC	DUT-RI-6.6	30489	38.3947	23.5888	53.2005	3.72302e-07
KIRC	NDUFAB1-AT-6	35611	-22.7756	-31.5761	-13.975	3.92981e-07
KIRC	FIS1-AP-2.1	81053	-11.9372	-16.5543	-7.32014	4.03308e-07
KIRC	THAP9-ES-0.0854166666666667	69749	3.30462	2.02115	4.58808	4.50162e-07
KIRC	GSK3A-AP-1	50138	-1.94686	-2.70395	-1.18977	4.65394e-07
KIRC	CHFR-AT-19.2	25311	7.81824	4.77719	10.8593	4.68279e-07
KIRC	SNF8-ES-0.128554398148148	42269	-66.0091	-91.7352	-40.283	4.93142e-07
KIRC	PSAP-AA-8.1	12067	5.42551	3.30912	7.54189	5.04707e-07
KIRC	MLTK-AT-14	55998	-2.86131	-3.97749	-1.74513	5.05139e-07
KIRC	LGMN-ES-2	29011	2.49084	1.51836	3.46331	5.16396e-07
KIRC	URGCP-AP-4.1	79355	1.9796	1.20493	2.75427	5.48505e-07
KIRC	MEPCE-AP-2.1	80949	4.16236	2.53303	5.79169	5.52823e-07
KIRC	FGF7-AT-4	30551	-14.3217	-19.9296	-8.71386	5.57212e-07
KIRC	ZNF808-AT-6	51468	3.72016	2.26334	5.17698	5.586e-07
KIRC	RAB5C-ES-2	41014	2.24052	1.36292	3.11812	5.62108e-07
KIRC	PLEKHA7-AT-23.2	14508	3.23897	1.96986	4.50808	5.66965e-07
KIRC	ZNF549-AT-4	52284	-3.06729	-4.26995	-1.86463	5.77087e-07
KIRC	FAM65B-AT-28	75542	-3.98046	-5.54133	-2.41958	5.78718e-07
KIRC	RPL23A-AP-1	39967	-32.8704	-45.7634	-19.9774	5.82667e-07
KIRC	ZNF354A-ES-4	74880	2.36477	1.4372	3.29233	5.82851e-07
KIRC	FLII-ES-18:19:20:21:22:23:24:25:26:27:28:29:30:31.1	39591	-49.2043	-68.5114	-29.8973	5.88351e-07
KIRC	NDUFB9-AT-4	85103	41.911	25.4604	58.3616	5.933e-07
KIRC	SMIM4-AT-2	65229	1.90036	1.15367	2.64706	6.0957e-07
KIRC	RANBP1-RI-7.2	61140	4.86963	2.95567	6.7836	6.14329e-07
KIRC	API5-AT-16.3	15448	-21.8863	-30.4955	-13.2771	6.27238e-07
KIRC	PIGT-ES-9	59546	-26.4649	-36.8795	-16.0502	6.34168e-07
KIRC	TUBGCP2-AP-1	13527	3.00027	1.81926	4.18128	6.38645e-07
KIRC	ENTPD5-AT-17	28353	-4.55078	-6.34332	-2.75824	6.49731e-07
KIRC	TSC22D3-AP-4	89836	-4.32548	-6.03083	-2.62013	6.65132e-07
KIRC	RPL28-AA-4.3	52098	7.655	4.63482	10.6752	6.77292e-07
KIRC	FEZ2-AP-1	53193	-1.76009	-2.45537	-1.06481	6.98969e-07
KIRC	DBNDD1-AP-3.1	38196	2.88336	1.7442	4.02253	7.01707e-07
KIRC	BTF3L4-ES-5	2994	-21.2849	-29.6956	-12.8742	7.04772e-07
KIRC	ZC3HAV1-AT-13	81940	-2.84553	-3.97044	-1.72061	7.12878e-07
KIRC	PODXL-ES-3	81825	2.15731	1.30416	3.01045	7.19343e-07
KIRC	QKI-AT-9	78405	5.23954	3.16711	7.31196	7.22508e-07
KIRC	C14orf79-AP-1	29587	-2.06872	-2.88728	-1.25016	7.29503e-07
KIRC	IYD-AT-7	78139	-2.18083	-3.04416	-1.3175	7.38358e-07
KIRC	ZNF544-ES-0.00636689814814815	52428	2.14552	1.29602	2.99501	7.41479e-07
KIRC	NDRG1-ES-9	85235	4.11226	2.48224	5.74227	7.62713e-07
KIRC	NASP-ES-2	2754	2.23716	1.34991	3.12442	7.73493e-07
KIRC	ITPKB-AT-9	10022	-2.54507	-3.55451	-1.53562	7.74976e-07
KIRC	SLC35E4-AT-2	61791	3.11276	1.87756	4.34797	7.84463e-07
KIRC	ATP5J2-ES-4	80643	-31.6627	-44.2514	-19.074	8.23747e-07
KIRC	EIF4A1-RI-9.4	38989	5.39513	3.24646	7.54381	8.59737e-07
KIRC	SCD5-AT-8	69716	-2.15485	-3.01557	-1.29414	9.25318e-07
KIRC	43349-AT-13.3	89964	-4.7384	-6.63123	-2.84558	9.2726e-07
KIRC	WBSCR22-ES-12	80002	8.48798	5.09733	11.8786	9.273e-07
KIRC	CAMK1D-AT-11	10772	-3.99956	-5.59766	-2.40146	9.33344e-07
KIRC	ERO1LB-AT-16	10370	-3.40217	-4.76267	-2.04167	9.52394e-07
KIRC	FBXL18-AT-6	78667	-4.35454	-6.09591	-2.61318	9.52591e-07
KIRC	ZNF254-AT-9	48839	-9.3185	-13.0456	-5.59138	9.57024e-07
KIRC	ERCC4-AT-11	34064	-2.44694	-3.42595	-1.46793	9.64558e-07
KIRC	WDR41-ES-3	72586	2.81715	1.6897	3.9446	9.71483e-07
KIRC	SEMA5A-AT-24	71544	-14.9494	-20.9413	-8.95746	1.00852e-06
KIRC	CBFA2T2-AT-17	58991	-2.60156	-3.64471	-1.55842	1.01819e-06
KIRC	UBXN6-AP-1	46802	-9.8522	-13.8138	-5.89062	1.09196e-06
KIRC	UEVLD-AT-14	14667	-3.65033	-5.11815	-2.18251	1.09221e-06
KIRC	VPS28-RI-3.2	85611	12.8994	7.70666	18.0921	1.12274e-06
KIRC	MBP-AT-14.2	45841	4.35828	2.60166	6.11489	1.1574e-06
KIRC	THAP3-AT-7	486	4.5452	2.70945	6.38095	1.21766e-06
KIRC	TCAIM-AT-13	64358	-2.94188	-4.13014	-1.75362	1.21942e-06
KIRC	LAMP2-AT-10	89999	4.52278	2.69565	6.34991	1.2247e-06
KIRC	AGBL5-AT-16	52925	-3.01939	-4.23958	-1.79921	1.23462e-06
KIRC	ZNF585A-AT-7.6	49449	-4.28505	-6.0168	-2.55331	1.23611e-06
KIRC	TPM2-ME-6|7	86278	-6.80023	-9.55065	-4.04981	1.26051e-06
KIRC	RGS3-AP-29	87290	2.75921	1.64314	3.87527	1.26266e-06
KIRC	FOXP1-ES-0.297222222222222	65608	1.62707	0.968773	2.28537	1.27045e-06
KIRC	MRPL48-AP-1	17714	-2.38536	-3.35086	-1.41987	1.28338e-06
KIRC	ZNF585B-AP-6.1	49454	3.95671	2.35417	5.55925	1.30363e-06
KIRC	RPL35A-ES-4	68337	242.797	144.428	341.167	1.3141e-06
KIRC	USMG5-ES-2.2	13004	8.08488	4.80882	11.3609	1.31855e-06
KIRC	SETBP1-AT-8	45324	-8.32624	-11.7007	-4.95174	1.32463e-06
KIRC	TIMM10B-AT-3.3	14145	-8.66515	-12.1789	-5.15136	1.34255e-06
KIRC	GUK1-AD-5.4	10189	17.9617	10.6713	25.2521	1.37329e-06
KIRC	PPP2R5C-AT-22	29320	-3.44882	-4.84917	-2.04847	1.38578e-06
KIRC	DCBLD1-AT-15	77342	5.84923	3.47096	8.2275	1.43254e-06
KIRC	RALGPS1-AT-24	87608	-3.66905	-5.16138	-2.17673	1.44433e-06
KIRC	PDCD2-AT-7	78498	-4.76195	-6.69899	-2.82491	1.44777e-06
KIRC	DIDO1-AT-17	60092	-4.82272	-6.7847	-2.86073	1.45186e-06
KIRC	ZNF606-AT-7	52379	-2.33829	-3.28963	-1.38694	1.45484e-06
KIRC	ZNF747-AT-2.3	36150	5.20294	3.08564	7.32024	1.46234e-06
KIRC	NDUFS2-ES-3	8598	-17.6605	-24.849	-10.472	1.47089e-06
KIRC	ZFAND2A-AT-5.2	78569	11.4264	6.77457	16.0783	1.47718e-06
KIRC	CDC37L1-AT-8	85773	-7.57687	-10.6654	-4.48833	1.52279e-06
KIRC	FLVCR2-AT-13	28511	9.59397	5.67832	13.5096	1.56913e-06
KIRC	CCNB1IP1-ES-6	26422	1.86374	1.10304	2.62443	1.57102e-06
KIRC	AKT3-AT-15	10463	-4.22444	-5.94871	-2.50018	1.5716e-06
KIRC	RPL7-RI-7.2	84147	19.6764	11.636	27.7168	1.61559e-06
KIRC	CERS5-ES-6.1:6.2	21681	2.04663	1.21017	2.88309	1.62173e-06
KIRC	RPRD1A-AT-10.3	45201	-12.9468	-18.2394	-7.6542	1.63098e-06
KIRC	ING3-AT-12	81586	-3.20327	-4.51286	-1.89367	1.63438e-06
KIRC	RNF181-RI-4.2	54293	34.9512	20.6606	49.2418	1.63845e-06
KIRC	PSMB7-AT-8	87532	2.61831	1.54684	3.68979	1.67213e-06
KIRC	SUMO2-AP-1	43379	-49.7248	-70.0747	-29.3749	1.67485e-06
KIRC	CYB561A3-RI-6.2	16166	1.96217	1.15898	2.76535	1.68313e-06
KIRC	FRMD3-AT-16.2	86683	-8.50379	-11.9925	-5.01505	1.77575e-06
KIRC	TTI2-RI-1.2	83333	2.48699	1.46602	3.50795	1.80335e-06
KIRC	SOD2-RI-8.2	78304	-4.13631	-5.83534	-2.43728	1.82818e-06
KIRC	CLCN6-AT-24	686	-2.36334	-3.33414	-1.39254	1.82951e-06
KIRC	PPP1R7-AT-11	58332	-4.27964	-6.04101	-2.51826	1.91532e-06
KIRC	SPTBN1-AT-37	53578	-11.3209	-15.9893	-6.65251	2.0048e-06
KIRC	RNF4-AT-13	68568	-7.90434	-11.1651	-4.64358	2.02296e-06
KIRC	WLS-AT-13	3361	-4.41877	-6.24203	-2.59551	2.03329e-06
KIRC	FTH1-AA-3.1	16334	27.0819	15.8866	38.2771	2.12415e-06
KIRC	WDR33-AT-22	55244	-3.02008	-4.26858	-1.77158	2.12559e-06
KIRC	RPL38-AT-4.2	43228	-26.8845	-38.0018	-15.7671	2.1406e-06
KIRC	CROT-AT-20	80322	-4.95638	-7.00626	-2.9065	2.14812e-06
KIRC	C8orf59-AP-1	84330	-4.52536	-6.39724	-2.65347	2.15523e-06
KIRC	AKR1B1-AA-3.1	81849	14.5587	8.52914	20.5883	2.21856e-06
KIRC	NUP62-RI-1.3	51123	3.33264	1.95009	4.71518	2.30666e-06
KIRC	LY75-AT-35	55708	2.67691	1.56621	3.78762	2.3158e-06
KIRC	PKM-ME-12|13	203434	16.7189	9.78104	23.6568	2.32235e-06
KIRC	SNX21-AT-4.2	59617	-5.76507	-8.15744	-3.37271	2.32293e-06
KIRC	ANKLE2-RI-1.2	25300	1.73443	1.01461	2.45424	2.32839e-06
KIRC	GTF2IRD2B-AT-17	80105	-3.00184	-4.25238	-1.7513	2.54148e-06
KIRC	NGFRAP1-AA-3.2	89732	-5.07479	-7.1898	-2.95978	2.56662e-06
KIRC	MSH2-AT-16	53497	28.7293	16.7144	40.7442	2.77872e-06
KIRC	BABAM1-ES-0.170208333333333	48256	-43.4511	-61.6536	-25.2485	2.88828e-06
KIRC	GPX3-ES-3	74124	-99.2563	-140.938	-57.5746	3.05272e-06
KIRC	COPZ1-RI-10.2:10.3	22160	22.7899	13.218	32.3617	3.06327e-06
KIRC	DDHD2-AP-11.1	83376	2.281	1.32247	3.23953	3.0994e-06
KIRC	ZSWIM7-ES-3	39398	1.95372	1.13236	2.77509	3.13109e-06
KIRC	HNRNPDL-ES-8	69705	3.47362	2.0131	4.93414	3.13946e-06
KIRC	MRPL45-ES-4	40572	2.05375	1.18999	2.91751	3.15931e-06
KIRC	SP110-AT-17	57862	3.20697	1.85799	4.55594	3.1698e-06
KIRC	PRKACB-AT-17	3587	-10.1774	-14.4594	-5.89544	3.18615e-06
KIRC	UGT8-AP-2.1	70428	8.45588	4.89493	12.0168	3.25309e-06
KIRC	RPL23-RI-5.2	40606	183.292	106.104	260.481	3.25331e-06
KIRC	CMTM4-AT-5	36828	3.60238	2.08491	5.11986	3.27435e-06
KIRC	TRIM34-AP-1	14067	1.52657	0.883009	2.17012	3.33251e-06
KIRC	EXOSC10-RI-16.4	644	1.87119	1.08222	2.66016	3.34505e-06
KIRC	RNF146-AT-6	77446	-8.75061	-12.4427	-5.05855	3.39513e-06
KIRC	TXNDC9-AT-6	54705	-8.08778	-11.503	-4.67255	3.4591e-06
KIRC	SMIM11-AT-5	60479	5.23084	3.02188	7.43979	3.46347e-06
KIRC	SNX1-AT-16.2	31090	-13.5328	-19.2498	-7.8158	3.49305e-06
KIRC	SDCCAG8-ES-6	10458	-7.13518	-10.1498	-4.12056	3.50167e-06
KIRC	ZSCAN20-AT-8	1679	-2.087	-2.96888	-1.20512	3.51225e-06
KIRC	CDK10-AP-1	38109	1.92863	1.11365	2.74362	3.51487e-06
KIRC	EXOC7-AT-21	43561	-42.7398	-60.8158	-24.6637	3.58272e-06
KIRC	KRT15-RI-7.2	40913	-1.53995	-2.19134	-0.888574	3.59313e-06
KIRC	RNF180-AT-8	72196	-2.05276	-2.92204	-1.18349	3.68534e-06
KIRC	ING5-AT-9	58408	-3.41195	-4.85719	-1.96671	3.70775e-06
KIRC	ZCCHC8-AP-2.1	24958	2.15223	1.24017	3.0643	3.74594e-06
KIRC	OGFR-AP-1	60084	-2.02343	-2.88094	-1.16592	3.74855e-06
KIRC	PHF20-ES-2	59255	1.86062	1.07182	2.64941	3.7794e-06
KIRC	ARL6IP4-AA-3.2	25027	-14.4383	-20.5699	-8.30657	3.92866e-06
KIRC	GDI1-AT-13	90606	-17.5297	-24.9746	-10.0849	3.93146e-06
KIRC	ESYT2-AP-1	82534	-1.52487	-2.17248	-0.877257	3.93224e-06
KIRC	GTF2IRD2-AT-17	80091	-2.50809	-3.57476	-1.44142	4.05551e-06
KIRC	IRF3-ES-5.1	50996	-19.5389	-27.8492	-11.2285	4.06259e-06
KIRC	CXorf40A-AT-4.2	90300	6.08004	3.49278	8.6673	4.10695e-06
KIRC	TROVE2-AT-10.5	9253	-2.23161	-3.18173	-1.2815	4.15395e-06
KIRC	VSTM4-AT-9	11498	-3.80635	-5.42845	-2.18424	4.2422e-06
KIRC	DDX3X-AP-1	88849	-4.73166	-6.75083	-2.71249	4.37081e-06
KIRC	MAST4-AT-36	72281	-2.55687	-3.64799	-1.46575	4.37212e-06
KIRC	ZNF737-AT-6	48720	-2.70819	-3.86447	-1.55192	4.42041e-06
KIRC	SHISA9-AT-6	34063	3.73397	2.13952	5.32843	4.43342e-06
KIRC	LTB4R-AP-2.1	26964	2.31653	1.32731	3.30575	4.43693e-06
KIRC	POR-RI-16.3:16.4	80137	8.72404	4.99658	12.4515	4.49107e-06
KIRC	DST-AT-108	76557	-14.6792	-20.9593	-8.39913	4.62162e-06
KIRC	PCDH1-AT-7	73831	-2.46839	-3.52468	-1.41209	4.64724e-06
KIRC	NR4A1-AP-4.1	21884	-1.53285	-2.18961	-0.876098	4.77325e-06
KIRC	TPM3-ES-5.1:5.2:5.3	7796	-89.5469	-127.934	-51.1601	4.82835e-06
KIRC	LEPR-AT-22	3295	-2.56313	-3.66227	-1.46399	4.86475e-06
KIRC	ERCC5-AP-1.1	26225	-7.26246	-10.3782	-4.14673	4.9126e-06
KIRC	SERAC1-AT-19	78255	-2.21028	-3.15882	-1.26174	4.94578e-06
KIRC	EHHADH-AT-7	67978	-15.3887	-21.9932	-8.78417	4.95292e-06
KIRC	AACS-AP-13.1	25170	1.785	1.0182	2.55181	5.05522e-06
KIRC	POM121-AT-17	79927	-2.4952	-3.5677	-1.4227	5.1173e-06
KIRC	NEU3-AT-5.2	17810	-1.88114	-2.69004	-1.07224	5.1643e-06
KIRC	RPE-ES-8	57242	1.73519	0.988916	2.48146	5.18431e-06
KIRC	CCNL2-AT-12	155	3.87746	2.2093	5.54562	5.22065e-06
KIRC	ISY1-ES-9	66700	1.80047	1.02579	2.57515	5.23236e-06
KIRC	USP33-AT-25	3531	-14.7528	-21.1023	-8.40338	5.26521e-06
KIRC	FKBP3-ES-3	27404	1.92655	1.09709	2.75601	5.30588e-06
KIRC	ZNF81-AT-6	88943	-1.98004	-2.83265	-1.12742	5.32268e-06
KIRC	NFIB-AT-15	85882	-8.3955	-12.0179	-4.77311	5.5577e-06
KIRC	NKIRAS2-ES-6	40978	1.91371	1.08779	2.73962	5.58859e-06
KIRC	ETV3-AT-5	8340	-9.76889	-13.9861	-5.55168	5.62196e-06
KIRC	EXOSC3-AT-4.2	86444	-2.1212	-3.03713	-1.20526	5.6506e-06
KIRC	PTPRJ-AT-26	15812	-1.88037	-2.69283	-1.06791	5.72854e-06
KIRC	ST20-AP-1	32162	-1.87073	-2.67911	-1.06236	5.7407e-06
KIRC	ABL2-AT-14.3	9103	-4.82968	-6.91698	-2.74237	5.75943e-06
KIRC	ELP5-RI-7.4	38889	-3.51279	-5.03181	-1.99378	5.82893e-06
KIRC	RECQL5-AT-20	43466	21.8115	12.3706	31.2524	5.95012e-06
KIRC	AP1S3-AT-7	57760	-2.65488	-3.80489	-1.50486	6.04854e-06
KIRC	NTPCR-AT-6	10317	-5.62353	-8.05955	-3.18752	6.05185e-06
KIRC	MYO19-ES-11.2:12	40489	1.69017	0.957784	2.42255	6.09313e-06
KIRC	LIMCH1-AT-39	69114	-12.1263	-17.3847	-6.86787	6.18907e-06
KIRC	CAPNS1-RI-10.2	49360	52.4188	29.6778	75.1597	6.24872e-06
KIRC	NRCAM-AT-36	81397	7.80654	4.41851	11.1946	6.30013e-06
KIRC	NIPA1-AP-2	29688	2.42446	1.37222	3.4767	6.30326e-06
KIRC	COX15-AT-10	12777	4.39651	2.48514	6.30788	6.53503e-06
KIRC	NLRC5-AT-51	36514	-24.9856	-35.8484	-14.1228	6.54045e-06
KIRC	SNRPB-AA-8.1	58542	-6.61997	-9.49834	-3.7416	6.55257e-06
KIRC	TTC14-AT-5.7	67724	-4.84687	-6.95469	-2.73905	6.57894e-06
KIRC	ZNF7-AT-8.2	85657	-4.09454	-5.8766	-2.31248	6.69059e-06
KIRC	WBP2-RI-10.2	43518	-123.682	-177.521	-69.843	6.71474e-06
KIRC	NIN-AT-33	27492	-3.77141	-5.41582	-2.127	6.95306e-06
KIRC	SAT2-AD-1.2	39032	4.2726	2.40931	6.13588	6.98019e-06
KIRC	ETFB-AP-2.1	51320	2.04977	1.1549	2.94463	7.14004e-06
KIRC	ZNF431-AT-7	48755	-3.735	-5.36776	-2.10223	7.34397e-06
KIRC	MGRN1-RI-17.2	33779	1.59267	0.894617	2.29073	7.75534e-06
KIRC	AUTS2-AT-20	79909	-5.5142	-7.93201	-3.09639	7.82158e-06
KIRC	HNRNPM-ES-3	47237	-11.1333	-16.0278	-6.2388	8.26329e-06
KIRC	SLC3A1-AT-11	53425	-4.33211	-6.23703	-2.42718	8.30125e-06
KIRC	NDUFS3-RI-3.2	15785	6.55943	3.67475	9.44412	8.3221e-06
KIRC	ANTXR1-AT-20	53845	-5.90356	-8.50029	-3.30682	8.35478e-06
KIRC	ZNF410-ES-14	28328	2.10777	1.1805	3.03503	8.38165e-06
KIRC	NDRG1-ES-2.2:2.3:3:4:5.1:5.2:6:7.1:7.2:8:10:11:12:13:14:15:16.1	85250	-37.5628	-54.1035	-21.022	8.55e-06
KIRC	UGP2-AP-2	53745	2.08547	1.16675	3.00418	8.62401e-06
KIRC	PRRG1-AT-6	88778	-2.14769	-3.09526	-1.20013	8.89842e-06
KIRC	MLH3-ES-0.297222222222222	28468	2.9639	1.6552	4.27259	9.04298e-06
KIRC	GET4-AP-2.1	78552	1.55248	0.866905	2.23806	9.06657e-06
KIRC	SEC31A-AD-10.2	69735	1.70563	0.951745	2.45952	9.23648e-06
KIRC	TAOK2-AT-16.3	35998	-5.29532	-7.63773	-2.95291	9.39079e-06
KIRC	BCAM-AT-15	50346	-2.60471	-3.75754	-1.45188	9.49593e-06
KIRC	PPP1R12B-AT-27	9413	-7.91918	-11.4271	-4.41128	9.65905e-06
KIRC	GPATCH2-AT-11	9838	2.46201	1.37142	3.5526	9.66141e-06
KIRC	IK-ES-3	73709	1.83899	1.02418	2.65379	9.7078e-06
KIRC	ARSK-AT-11	72806	-2.62114	-3.78329	-1.45899	9.84563e-06
KIRC	OARD1-AT-7	76085	-8.48648	-12.2499	-4.72307	9.88348e-06
KIRC	LBH-ES-4	53112	1.78597	0.993861	2.57808	9.90991e-06
KIRC	SYT15-AT-8.4	11433	-3.47358	-5.01503	-1.93213	1.00228e-05
KIRC	HKR1-AT-17.2	49480	-2.70988	-3.91269	-1.50707	1.00681e-05
KIRC	LPCAT3-RI-10.2	20060	2.60756	1.45001	3.76512	1.00963e-05
KIRC	TYROBP-AA-4.1	49315	24.7335	13.7276	35.7394	1.05969e-05
KIRC	MTPAP-AP-3	11118	-13.0294	-18.8303	-7.22862	1.07086e-05
KIRC	TRAPPC2-RI-6.2	88516	-3.74994	-5.41995	-2.07992	1.07748e-05
KIRC	HDHD3-AP-1	87277	-1.83009	-2.64524	-1.01493	1.08107e-05
KIRC	PDCD5-RI-5.4	48879	4.54623	2.52025	6.57221	1.09207e-05
KIRC	CDKL1-AT-10	27473	-4.29142	-6.20386	-2.37899	1.0921e-05
KIRC	SEPP1-ES-3	71916	-73.4454	-106.199	-40.692	1.10787e-05
KIRC	ILF3-AT-20	47570	-4.89873	-7.08349	-2.71396	1.10938e-05
KIRC	ATF7IP-AT-16	20547	-10.2516	-14.826	-5.67716	1.12108e-05
KIRC	GUK1-ES-11.1:11.2	10185	-21.4031	-30.9541	-11.852	1.12252e-05
KIRC	C5orf45-RI-7.2	74948	1.54956	0.856453	2.24266	1.17679e-05
KIRC	NAP1L1-AT-14.3	23471	-12.154	-17.5906	-6.71735	1.17788e-05
KIRC	ZNF616-AT-5	51408	-3.28847	-4.76005	-1.81689	1.18765e-05
KIRC	HSPA14-AT-4	10831	-2.29798	-3.32633	-1.26962	1.18804e-05
KIRC	PSMG4-AT-6	75172	-3.32811	-4.81815	-1.83808	1.19919e-05
KIRC	MAPK13-AT-11	75950	-20.0444	-29.0194	-11.0694	1.20163e-05
KIRC	CISD2-ES-3	70154	1.8015	0.994444	2.60857	1.21436e-05
KIRC	RASEF-AT-18	86677	-2.28115	-3.3041	-1.25821	1.23855e-05
KIRC	ZKSCAN7-AT-7	64365	-3.57743	-5.18197	-1.97288	1.24328e-05
KIRC	PDHB-AD-9.2	65453	7.49179	4.12855	10.855	1.26588e-05
KIRC	SH3BP5-ES-0.254861111111111	63567	1.79782	0.989572	2.60608	1.30291e-05
KIRC	PNRC1-AP-1.1	76985	-5.47658	-7.9432	-3.00996	1.35111e-05
KIRC	DAG1-AP-1	64874	3.31873	1.8235	4.81397	1.36001e-05
KIRC	TTC3-AP-2	60545	3.10593	1.7061	4.50576	1.36916e-05
KIRC	CNIH4-ES-4	9958	-17.8772	-25.935	-9.8194	1.37122e-05
KIRC	PRR11-AT-11.2	42760	3.1844	1.74728	4.62152	1.4059e-05
KIRC	ZNF85-AP-4	48732	1.56919	0.860976	2.27741	1.40751e-05
KIRC	KRBOX4-AT-8.2	88886	-4.70592	-6.83028	-2.58157	1.41349e-05
KIRC	CCT3-ES-3	8239	1.64895	0.904412	2.39349	1.41978e-05
KIRC	SNX19-AT-13	19506	-15.3982	-22.3522	-8.4442	1.4252e-05
KIRC	SRPK2-AT-21.4	81282	6.23008	3.41544	9.04473	1.43598e-05
KIRC	TIMM10B-RI-3.2	14146	-11.0868	-16.099	-6.07454	1.45539e-05
KIRC	POLD4-ES-3	17169	-50.5267	-73.371	-27.6824	1.45751e-05
KIRC	RABGGTB-AT-11	3513	-9.74448	-14.1556	-5.33338	1.49302e-05
KIRC	HNF1A-AT-8	24782	-2.00061	-2.90665	-1.09456	1.50659e-05
KIRC	KMT2C-AP-57	82413	1.88531	1.03146	2.73915	1.50711e-05
KIRC	MTCH1-AT-12	75998	-6.79719	-9.87741	-3.71697	1.52466e-05
KIRC	EFCAB14-AT-11	2824	6.44887	3.52604	9.37169	1.5293e-05
KIRC	PPM1F-AT-9	61261	-2.44988	-3.56047	-1.3393	1.53532e-05
KIRC	GNB2L1-ES-4.1:4.2	75060	75.0881	41.0481	109.128	1.5361e-05
KIRC	CD44-AT-18	14974	-31.269	-45.4446	-17.0934	1.53676e-05
KIRC	DNAL4-AT-4	62264	-19.7506	-28.7084	-10.7928	1.55041e-05
KIRC	MRPS16-AT-3.2	12136	7.5461	4.12308	10.9691	1.55481e-05
KIRC	WDR33-RI-6.2	55246	1.71619	0.93764	2.49475	1.55735e-05
KIRC	TPI1-AP-1	19990	-5.37245	-7.81041	-2.93449	1.56663e-05
KIRC	DDX55-AP-12.1	25084	2.47269	1.35017	3.5952	1.57853e-05
KIRC	ORAI3-AT-3.3	36207	-4.93067	-7.17016	-2.69118	1.59426e-05
KIRC	POLH-AT-11.3	76307	-2.70982	-3.94132	-1.47833	1.61226e-05
KIRC	BMP2K-AT-17	69645	-1.59697	-2.3233	-0.870639	1.63751e-05
KIRC	DYNLT1-RI-3.4	78277	6.31266	3.44073	9.18458	1.64651e-05
KIRC	C11orf48-RI-5.2	16387	20.7718	11.3152	30.2285	1.66895e-05
KIRC	CIRBP-RI-9.7	46423	3.32262	1.8098	4.83544	1.6723e-05
KIRC	PHF19-AT-16	87402	-2.45894	-3.57855	-1.33933	1.67306e-05
KIRC	ECT2-AT-27	67655	-6.3852	-9.29345	-3.47696	1.68348e-05
KIRC	TTC21B-AT-29.2	55811	-3.75265	-5.46229	-2.04302	1.69164e-05
KIRC	KRT18-RI-7.2	21913	14.0528	7.64557	20.4601	1.71789e-05
KIRC	RUVBL2-ES-3	50861	1.77069	0.962751	2.57862	1.74304e-05
KIRC	BRD4-AT-24	48069	4.46104	2.42538	6.49669	1.74566e-05
KIRC	TTC14-RI-3.9	67733	1.62467	0.883153	2.36619	1.7525e-05
KIRC	CSRP2-AT-7	23510	-13.6672	-19.9089	-7.42546	1.77366e-05
KIRC	CXorf40B-AT-5.2	90328	6.08951	3.30369	8.87533	1.83333e-05
KIRC	DTNBP1-AT-13	75415	-10.9015	-15.8887	-5.91422	1.83374e-05
KIRC	CASZ1-AT-21	622	-2.31039	-3.3681	-1.25268	1.85882e-05
KIRC	ZNF266-RI-6.3	47344	1.75258	0.949602	2.55555	1.88726e-05
KIRC	ARL5A-AT-7.2	55593	-12.0634	-17.5939	-6.53294	1.90971e-05
KIRC	PRICKLE3-AT-10.4	89099	-3.28838	-4.79671	-1.78006	1.92824e-05
KIRC	GPR107-AT-20	87892	-8.53958	-12.4612	-4.61791	1.97323e-05
KIRC	DUSP6-AP-1	23616	-4.81147	-7.02153	-2.60142	1.98115e-05
KIRC	CDC42SE2-RI-5.2	73223	2.18001	1.17839	3.18162	1.99145e-05
KIRC	ZNF160-AT-8	51651	-21.2518	-31.0239	-11.4797	2.02219e-05
KIRC	GALK2-ES-15	30524	1.95676	1.05622	2.85729	2.05559e-05
KIRC	FAM131A-AP-6.1	67924	1.75565	0.94716	2.56414	2.08023e-05
KIRC	FOXP1-AT-30	65601	-9.3134	-13.6032	-5.02356	2.08908e-05
KIRC	LGALS3BP-AT-6	43928	-35.0202	-51.1555	-18.8849	2.10066e-05
KIRC	STAG2-AP-1	90029	2.6221	1.41346	3.83074	2.11813e-05
KIRC	EEF1D-ES-6:7.2:8.1	85454	3.13577	1.68974	4.58181	2.13534e-05
KIRC	CIRBP-AA-8.1	46440	146.071	78.7059	213.436	2.13877e-05
KIRC	LPXN-ES-6	16011	1.58942	0.85621	2.32264	2.15002e-05
KIRC	VIM-RI-7.2	10930	18.3275	9.86419	26.7908	2.19224e-05
KIRC	HNRNPA3-RI-10.2	56125	9.69828	5.21639	14.1802	2.22398e-05
KIRC	ENOSF1-AP-11	44459	1.54954	0.832671	2.26642	2.27003e-05
KIRC	ARIH2-AP-4.1	64785	1.57359	0.845416	2.30177	2.28057e-05
KIRC	DDX56-AA-11.1	79533	20.6688	11.0995	30.238	2.30213e-05
KIRC	PTGR1-AA-12.1	87219	2.0019	1.07456	2.92924	2.32563e-05
KIRC	ADI1-AP-2	52563	1.73032	0.928597	2.53204	2.33582e-05
KIRC	APOL4-AT-7.3	62002	-5.37741	-7.8696	-2.88522	2.34705e-05
KIRC	TOB1-AP-3	42491	-1.92395	-2.81665	-1.03125	2.39862e-05
KIRC	IST1-AP-5	37509	-1.69494	-2.48142	-0.908457	2.40112e-05
KIRC	ADRA1A-AT-8	83135	1.80231	0.965772	2.63884	2.41369e-05
KIRC	ODF2-AT-26	87755	-4.55304	-6.67046	-2.43563	2.50359e-05
KIRC	VPS53-AT-23.2	38218	-2.39935	-3.51525	-1.28345	2.50636e-05
KIRC	DYNLT1-RI-3.2	78278	4.32644	2.31365	6.33924	2.52125e-05
KIRC	METTL3-RI-3.2	26600	-15.0406	-22.0448	-8.03633	2.56815e-05
KIRC	PTGER3-AT-2.3	3412	-3.27826	-4.80593	-1.75059	2.60008e-05
KIRC	GGCX-AT-15	54283	-13.5741	-19.9043	-7.24385	2.63632e-05
KIRC	TEX9-AT-8.2	30759	2.01266	1.07245	2.95287	2.72155e-05
KIRC	ZBTB1-AT-4.2	27892	-5.11776	-7.50966	-2.72587	2.74577e-05
KIRC	CNIH4-AA-5.1	9954	-8.58622	-12.6009	-4.57151	2.76804e-05
KIRC	RQCD1-ES-7	57497	1.70344	0.906059	2.50083	2.82605e-05
KIRC	TAF13-AT-5	3987	2.66327	1.41652	3.91003	2.82912e-05
KIRC	SSR2-ES-4.1:5	8161	-288.95	-424.263	-153.637	2.84746e-05
KIRC	ATP1B3-ES-4:5:6:8	67083	-35.6055	-52.3005	-18.9105	2.91479e-05
KIRC	DBNL-AT-14	79386	-19.8118	-29.1122	-10.5115	2.97785e-05
KIRC	ANAPC7-AT-11	24422	5.70613	3.02445	8.38781	3.03994e-05
KIRC	MCTP1-AT-26	72802	-5.35729	-7.87603	-2.83854	3.06231e-05
KIRC	SRSF2-RI-2.2:2.3:2.4	43663	1.79004	0.947898	2.63219	3.09921e-05
KIRC	FAM219B-RI-5.3	31792	-4.52669	-6.65642	-2.39697	3.10163e-05
KIRC	RAB11FIP1-AP-2.1	83362	1.3316	0.704517	1.95868	3.15543e-05
KIRC	PDE1A-AT-20	56454	-3.22782	-4.7487	-1.70694	3.18656e-05
KIRC	ZNF430-AT-6	48741	-2.6212	-3.85663	-1.38577	3.2042e-05
KIRC	SYNJ2-AD-19.3	78249	1.45034	0.766666	2.13402	3.21275e-05
KIRC	DALRD3-RI-11.3	64809	2.70658	1.43036	3.98281	3.22964e-05
KIRC	PRSS23-AT-2.3	18201	5.64522	2.98305	8.30738	3.23621e-05
KIRC	PTPRB-AT-35	23386	-10.4128	-15.3234	-5.50222	3.23769e-05
KIRC	MPI-AT-8	31775	-6.18575	-9.10335	-3.26814	3.24709e-05
KIRC	FAM115C-AT-12	82123	-4.75177	-6.9953	-2.50823	3.30789e-05
KIRC	SMDT1-AD-1.2	62494	18.6297	9.81469	27.4448	3.44002e-05
KIRC	RPL21-AD-1.2	25529	82.1554	43.2556	121.055	3.48221e-05
KIRC	ZNF20-AT-5	47778	-1.89278	-2.78928	-0.996272	3.50283e-05
KIRC	ZNF544-AT-10.2	52425	-2.21108	-3.25879	-1.16337	3.52968e-05
KIRC	STXBP4-AT-19	42571	-3.28131	-4.83637	-1.72625	3.53897e-05
KIRC	TAGAP-AT-10	78295	-2.09749	-3.09224	-1.10275	3.58463e-05
KIRC	BSDC1-RI-11.2	1591	1.96878	1.0348	2.90276	3.60385e-05
KIRC	MRPL33-AT-4	53045	4.82419	2.53488	7.11351	3.62509e-05
KIRC	ANKRD11-AT-18	38077	2.82207	1.48269	4.16146	3.63359e-05
KIRC	FAIM-ES-3	67016	1.83785	0.965473	2.71023	3.64203e-05
KIRC	SNRNP35-AP-1	25076	-4.38823	-6.47229	-2.30417	3.67636e-05
KIRC	INVS-AT-19	87073	-5.16035	-7.61205	-2.70864	3.70203e-05
KIRC	RPS27A-AP-2.1	53605	-58.6463	-86.5397	-30.7529	3.77478e-05
KIRC	CLCN5-AT-17	89131	-29.2834	-43.2153	-15.3515	3.79456e-05
KIRC	FAU-RI-2.5	16770	119.655	62.6838	176.625	3.84716e-05
KIRC	43353-AT-13	54903	4.69711	2.4605	6.93371	3.85289e-05
KIRC	OAZ1-AA-5.1	46594	25.6887	13.4554	37.922	3.85942e-05
KIRC	LSM12-ES-6	41759	2.1297	1.11482	3.14457	3.90645e-05
KIRC	SNX5-AT-13	58744	-12.1077	-17.8832	-6.33231	3.97526e-05
KIRC	QTRT1-RI-6.2	47582	1.33216	0.696561	1.96775	3.99227e-05
KIRC	APLP2-ES-9	19479	-3.45715	-5.10744	-1.80687	4.02769e-05
KIRC	EEF1D-ES-0.00425	85460	9.44996	4.93789	13.962	4.04492e-05
KIRC	TBC1D16-AT-14	44011	-4.66471	-6.89388	-2.43554	4.10687e-05
KIRC	CCT4-ES-2	53708	1.9623	1.02445	2.90015	4.11528e-05
KIRC	PGAM5-AT-8	25293	-9.65512	-14.2728	-5.03742	4.16602e-05
KIRC	H2AFY-ES-7	73446	-22.9346	-33.9186	-11.9505	4.26979e-05
KIRC	ACTR3-AT-13	55074	-26.3583	-38.9928	-13.7238	4.3343e-05
KIRC	TIMP1-RI-3.2	88928	39.7301	20.6849	58.7754	4.33867e-05
KIRC	LYZ-AT-4	23314	-159.715	-236.377	-83.0533	4.43952e-05
KIRC	NEDD8-AT-4	26910	-73.9898	-109.516	-38.4641	4.46423e-05
KIRC	PSPC1-AT-9	25402	-2.90173	-4.29603	-1.50743	4.52403e-05
KIRC	AAMDC-ES-5	17980	2.11588	1.09831	3.13345	4.59252e-05
KIRC	PRDX5-ES-0.0854166666666667	16639	-36.9356	-54.7028	-19.1684	4.61148e-05
KIRC	TRAFD1-ES-5	24579	1.4346	0.74428	2.12491	4.63825e-05
KIRC	PIN4-RI-3.2	89443	5.31709	2.75793	7.87624	4.65788e-05
KIRC	VAV3-AT-30	3931	-11.2946	-16.7331	-5.85617	4.692e-05
KIRC	PSIP1-AT-17	85919	-3.49786	-5.18233	-1.81339	4.70279e-05
KIRC	NDUFB8-AT-6	12824	-10.6422	-15.7692	-5.51524	4.73451e-05
KIRC	PEAK1-AT-8	31986	-19.0427	-28.222	-9.86327	4.78368e-05
KIRC	C1RL-AT-6	20072	-5.25653	-7.79318	-2.71987	4.87596e-05
KIRC	SNRNP25-ES-4	32783	12.115	6.26859	17.9615	4.87697e-05
KIRC	PPP1CC-AP-1	24497	-1.56819	-2.32543	-0.810957	4.92887e-05
KIRC	BRD8-AT-23	73506	-119.749	-177.603	-61.8956	4.97369e-05
KIRC	B3GALNT2-AT-13	10352	-1.83815	-2.72687	-0.949441	5.03796e-05
KIRC	NUCB2-AP-6	14520	-1.63659	-2.42789	-0.845293	5.04209e-05
KIRC	ACAD8-AT-12	19552	-7.00738	-10.3962	-3.61858	5.06024e-05
KIRC	SUMF2-ES-5.1:5.2	79790	-26.2695	-38.9823	-13.5567	5.12087e-05
KIRC	PARD3-AT-28	11208	-3.01269	-4.47096	-1.55442	5.14031e-05
KIRC	MFSD10-ES-9	68616	-25.755	-38.2294	-13.2806	5.19665e-05
KIRC	HGF-AT-20	80248	-2.12965	-3.16233	-1.09698	5.3007e-05
KIRC	TIMM50-ES-2:3:4:5:6:7:8	49836	-55.4922	-82.4152	-28.5693	5.35011e-05
KIRC	HAUS1-ES-3	45389	1.77937	0.91587	2.64287	5.37248e-05
KIRC	ZNF470-AT-6	52184	-2.2048	-3.27552	-1.13408	5.43876e-05
KIRC	BCAT2-AT-13	50812	-15.5046	-23.0352	-7.97386	5.45394e-05
KIRC	UPF3A-ES-4	26410	3.13838	1.61332	4.66344	5.49861e-05
KIRC	ERCC1-ES-9	50443	-10.7067	-15.9117	-5.50164	5.53935e-05
KIRC	TANK-AT-14	55733	-7.8811	-11.7128	-4.04939	5.54766e-05
KIRC	43168-AP-3.1	22744	2.71619	1.39557	4.0368	5.54976e-05
KIRC	DCTN3-RI-3.6:3.7	86183	8.5405	4.38733	12.6937	5.56737e-05
KIRC	LCLAT1-AT-9	53116	-2.1299	-3.16571	-1.09408	5.57356e-05
KIRC	USP48-AT-27	996	3.74697	1.92469	5.56924	5.5758e-05
KIRC	SUB1-AP-3	71655	-21.6052	-32.1203	-11.0901	5.64647e-05
KIRC	RNF4-AP-1.1	68565	-1.65364	-2.45966	-0.847631	5.79198e-05
KIRC	ERRFI1-AT-3.4	531	-26.7407	-39.7762	-13.7052	5.80446e-05
KIRC	NEK5-AT-22.2	25982	2.33913	1.19849	3.47977	5.83623e-05
KIRC	ZNF680-AT-5	79826	-5.54688	-8.25238	-2.84137	5.86065e-05
KIRC	DOCK10-AT-59	57781	-9.28082	-13.8117	-4.74997	5.95187e-05
KIRC	PRDX2-ES-5	47871	-73.6039	-109.538	-37.6695	5.95562e-05
KIRC	TMEM33-RI-8.2	69133	-2.27083	-3.38022	-1.16144	6.02351e-05
KIRC	SSR4-ES-4	90499	-112.801	-167.924	-57.6771	6.05325e-05
KIRC	ZSWIM7-RI-7.6	39391	1.73496	0.886879	2.58304	6.08234e-05
KIRC	SERPINB8-AT-8	45737	-6.72459	-10.0152	-3.43398	6.19347e-05
KIRC	MBD2-AT-8	45575	-12.8934	-19.2028	-6.58399	6.19598e-05
KIRC	CAPZA2-AT-11	81546	-15.6748	-23.3488	-8.00069	6.24525e-05
KIRC	FAM124B-AT-3	57772	-2.31946	-3.46056	-1.17836	6.77854e-05
KIRC	NPEPPS-AT-26	42078	-3.92025	-5.84908	-1.99142	6.78991e-05
KIRC	MBD1-AA-18.1:18.2:18.3	45514	4.01557	2.03742	5.99373	6.93083e-05
KIRC	ZCCHC9-RI-1.2:1.3:1.4	72669	1.38584	0.702985	2.0687	6.95877e-05
KIRC	C20orf196-AT-4	58657	-2.25398	-3.36481	-1.14316	6.97981e-05
KIRC	IGFBP7-AT-5	69391	-34.93	-52.1579	-17.702	7.07164e-05
KIRC	HNMT-AT-11	55470	-2.04479	-3.05387	-1.03571	7.13783e-05
KIRC	LIMK2-AT-18.3	61836	-3.98326	-5.95027	-2.01626	7.21717e-05
KIRC	SLC52A1-AP-1	38647	2.52958	1.28021	3.77895	7.23863e-05
KIRC	FBF1-AT-29	43530	3.10787	1.57263	4.64311	7.25787e-05
KIRC	AP2M1-AP-1	67840	-11.9355	-17.8338	-6.03716	7.30673e-05
KIRC	ZNF226-RI-7.2:7.3	50290	1.42324	0.719626	2.12685	7.35396e-05
KIRC	BLOC1S1-AP-1	22229	-11.1209	-16.6199	-5.62176	7.38135e-05
KIRC	RPS27-RI-2.2	7781	290.549	146.755	434.343	7.48622e-05
KIRC	CHTOP-RI-4.3	7750	2.29035	1.1564	3.42431	7.53528e-05
KIRC	ATP6V0B-AP-1.1	2505	-4.70386	-7.03319	-2.37452	7.55979e-05
KIRC	SHPK-AT-22	38462	4.54402	2.29161	6.79644	7.68439e-05
KIRC	EEF1A1-RI-1.3	76757	51.904	26.1456	77.6625	7.83504e-05
KIRC	CCNG2-AT-8	69631	3.49732	1.76171	5.23294	7.83517e-05
KIRC	SPCS2-ES-4:5.1:5.2	17804	-47.2461	-70.7229	-23.7693	8.00158e-05
KIRC	RC3H2-AT-22	87484	-2.18247	-3.2671	-1.09783	8.02116e-05
KIRC	C21orf59-RI-5.4	60356	3.92857	1.9754	5.88175	8.07262e-05
KIRC	TRAPPC2-AT-6.3	88513	-8.37013	-12.5332	-4.20703	8.12738e-05
KIRC	RPS27-AT-3	7780	-496.573	-743.609	-249.537	8.15605e-05
KIRC	43351-AT-12.3	73299	5.32724	2.67518	7.97929	8.24998e-05
KIRC	GLRX-AT-3.3	72826	-10.6036	-15.8833	-5.32402	8.2709e-05
KIRC	CTNNB1-RI-18.2:18.3	64250	-6.54083	-9.79805	-3.2836	8.29217e-05
KIRC	SEC24A-AT-24	73421	-6.10696	-9.14883	-3.0651	8.32324e-05
KIRC	TCHP-AT-14.2	24366	3.41136	1.70887	5.11385	8.59161e-05
KIRC	LYPLA2-ES-7	1076	-150.869	-226.167	-75.5705	8.6005e-05
KIRC	YIPF3-RI-4.8	76284	22.5682	11.2954	33.841	8.7145e-05
KIRC	RPL34-AD-1.2	70304	25.8559	12.9397	38.7722	8.72793e-05
KIRC	IER3IP1-AT-3.2	45442	8.09788	4.05257	12.1432	8.72935e-05
KIRC	MPPED2-AT-9	14793	-1.70055	-2.551	-0.850091	8.88853e-05
KIRC	RUVBL1-AT-12	66639	3.07803	1.5366	4.61945	9.08577e-05
KIRC	VTI1A-AT-9	13115	-1.9823	-2.97565	-0.98896	9.18084e-05
KIRC	VAMP3-AP-1	509	-1.80774	-2.71495	-0.900528	9.40332e-05
KIRC	ACBD4-AT-12	41941	-2.3129	-3.4742	-1.15159	9.47955e-05
KIRC	AKT1-AA-15.1	29565	-62.0375	-93.2023	-30.8727	9.55742e-05
KIRC	PTPN6-AA-16.1	20028	9.32177	4.63326	14.0103	9.74613e-05
KIRC	GABARAP-AT-3	38862	-166.58	-250.411	-82.7491	9.83482e-05
KIRC	NDEL1-AT-12.2	39188	16.4108	8.15156	24.6701	9.84549e-05
KIRC	NFATC1-AT-11	46239	-2.55669	-3.84458	-1.2688	9.98879e-05
KIRC	TRPM4-ES-0.381944444444444	50902	-74.9122	-112.65	-37.1745	9.99654e-05
KIRC	HIST1H2BD-AT-2	75606	-2.92004	-4.3911	-1.44897	0.000100042
KIRC	DISC1-AT-17	10280	-1.7781	-2.67448	-0.881713	0.000101136
KIRC	LRPAP1-AT-8	68649	-7.93438	-11.9353	-3.93343	0.000101555
KIRC	DECR1-ES-8.1	84402	-54.1341	-81.434	-26.8342	0.000101701
KIRC	SPG11-AT-40	30344	-10.2957	-15.4942	-5.0973	0.000103687
KIRC	METTL17-RI-6.2	26478	1.85406	0.917892	2.79024	0.000103747
KIRC	HNRNPD-AT-9	69699	-2.97134	-4.47203	-1.47065	0.000104156
KIRC	PRDX2-AT-6	47869	-87.3206	-131.433	-43.2077	0.000104582
KIRC	ATP6V0B-AA-2.1	2513	7.04269	3.48024	10.6051	0.000106755
KIRC	EIF4A1-RI-9.2	38990	13.5466	6.68595	20.4073	0.000108829
KIRC	ANO10-ES-6	64348	-18.3076	-27.5804	-9.03488	0.000108992
KIRC	BMP8B-AT-8	1912	-1.58587	-2.38919	-0.782558	0.000109157
KIRC	NEDD9-AT-11	75340	-1.96243	-2.95671	-0.968155	0.000109535
KIRC	ZNF397-AT-4.2	45145	-2.42672	-3.65624	-1.1972	0.000109552
KIRC	UBE2Q2-AP-1	31888	-2.01592	-3.03739	-0.994459	0.000109683
KIRC	ACSL6-AT-27	73246	-1.84035	-2.77411	-0.906591	0.000112051
KIRC	MRPL21-RI-6.2	17340	6.98882	3.44183	10.5358	0.000112547
KIRC	MIEF2-AT-5.3	39598	-7.84062	-11.8223	-3.8589	0.000113634
KIRC	DLC1-AT-22	82766	-7.24607	-10.9313	-3.56086	0.000116299
KIRC	RPS14-AD-1.2:1.3	74095	73.9578	36.3101	111.605	0.000117977
KIRC	BTN2A1-AT-9.2	75669	-10.2714	-15.5014	-5.04136	0.000118495
KIRC	TATDN1-AT-13	85078	-7.61518	-11.493	-3.73735	0.000118635
KIRC	RPRD1A-RI-10.2	45203	-8.44551	-12.7493	-4.14169	0.000120017
KIRC	ANKMY1-AT-9.4	58250	-1.92554	-2.90704	-0.944046	0.000120482
KIRC	ZNF880-AT-5	51448	-1.36879	-2.06657	-0.671018	0.000120666
KIRC	ZFAND1-AT-9.2	84304	-15.8586	-23.946	-7.77111	0.000121412
KIRC	CFLAR-AT-17	56794	-4.20011	-6.34224	-2.05797	0.000121576
KIRC	RNASET2-AA-7.1	78433	4.79507	2.3486	7.24154	0.000122278
KIRC	FAM178A-AT-20	12842	-2.32764	-3.51525	-1.14003	0.000122326
KIRC	MLLT4-AT-36	78446	-10.5778	-15.9769	-5.17874	0.000123066
KIRC	MGRN1-AA-17.1:17.2	33780	1.53195	0.749733	2.31417	0.000123772
KIRC	AKAP17A-AT-5	88392	-4.16072	-6.28574	-2.0357	0.000124274
KIRC	SCAF11-AT-18	21317	-2.09989	-3.17419	-1.02559	0.000127591
KIRC	FAXDC2-AT-12	74226	-10.3864	-15.7008	-5.07206	0.000127852
KIRC	ADORA3-AT-3	4174	-1.85334	-2.80189	-0.904801	0.000128379
KIRC	C10orf76-AT-26	12933	-6.74823	-10.2023	-3.29414	0.000128576
KIRC	FTH1-AP-1.1	16328	-16.4631	-24.8935	-8.03261	0.000129486
KIRC	ACAA1-AT-12	64016	-12.2814	-18.5719	-5.99088	0.000129941
KIRC	JTB-RI-1.2	7777	21.9772	10.7185	33.2359	0.0001303
KIRC	CLN3-AT-19.2	35717	-7.51342	-11.3634	-3.66342	0.000130802
KIRC	BLOC1S1-RI-4.2	22233	11.5818	5.64665	17.517	0.000130958
KIRC	MSL1-AT-9	40843	-3.21187	-4.85826	-1.56548	0.000131509
KIRC	ERP29-AP-1	24567	-6.67415	-10.0957	-3.25264	0.000131735
KIRC	PSME2-AA-3.1	26864	5.85681	2.85234	8.86129	0.000133082
KIRC	CLYBL-AT-9.3	26186	-2.92913	-4.43188	-1.42637	0.000133288
KIRC	CD164-AA-7.1:7.2	77185	-226.144	-342.209	-110.079	0.000134073
KIRC	SOD2-AT-8.3	78303	-1.95536	-2.95897	-0.951747	0.000134188
KIRC	ESCO2-AT-11.2	83185	2.55183	1.24164	3.86203	0.000134885
KIRC	ZFC3H1-RI-32.2	23406	1.43527	0.69746	2.17309	0.000137442
KIRC	RPS6-RI-1.5	85971	81.3546	39.5162	123.193	0.000138326
KIRC	ZNF302-AA-6.1	48982	1.7405	0.845138	2.63586	0.000138973
KIRC	AKR1A1-AT-10	2696	-6.80744	-10.3109	-3.30403	0.000139879
KIRC	TPM2-AT-11.2	86276	-10.434	-15.8042	-5.06381	0.000140034
KIRC	SUMF2-ES-4:5.1:5.2	79797	-43.868	-66.4462	-21.2898	0.000140048
KIRC	LPP-AT-13	68087	-7.65518	-11.5985	-3.71187	0.000141862
KIRC	CAPN2-AP-2	9923	-1.52102	-2.30552	-0.736509	0.000144689
KIRC	TMEM41A-AT-5	68011	-9.52193	-14.4333	-4.61057	0.000144758
KIRC	ZNF684-AT-6	2009	-1.83907	-2.78777	-0.890366	0.000145044
KIRC	CNTLN-AT-7.3	85938	-3.09602	-4.69319	-1.49886	0.000145112
KIRC	CNNM2-AT-9	12983	-2.33684	-3.54242	-1.13126	0.000145225
KIRC	MSMO1-AT-6	71041	-43.1533	-65.4167	-20.8898	0.00014528
KIRC	SENP6-AT-26	76793	-5.05919	-7.66968	-2.44869	0.000145605
KIRC	TP53BP2-ES-0.0854166666666667	9931	6.81381	3.29695	10.3307	0.000146236
KIRC	TMEM126B-AT-6.3	18113	-21.3387	-32.3526	-10.3247	0.000146297
KIRC	ZNF586-AT-4	52336	-2.31255	-3.5062	-1.11889	0.000146362
KIRC	PLSCR1-AT-10	67158	-6.44054	-9.76512	-3.11596	0.000146495
KIRC	PSEN1-AP-1.1	28260	-1.34617	-2.04125	-0.651089	0.000147124
KIRC	RPL31-RI-2.2:2.3	54736	158.135	76.3991	239.871	0.000149464
KIRC	ANKRD36-AT-76	54594	1.99155	0.962019	3.02107	0.000149796
KIRC	NCOA6-AP-2	59035	1.47969	0.714622	2.24475	0.000150221
KIRC	SPINT2-ES-2	49599	-51.8421	-78.6528	-25.0313	0.000150738
KIRC	PRELID1-AA-2.1	74750	24.778	11.9524	37.6036	0.000152788
KIRC	KAZN-AT-11.2	733	-2.10191	-3.19006	-1.01376	0.000153132
KIRC	DPYD-AT-25	3836	-8.34849	-12.6751	-4.02186	0.000155654
KIRC	CIRBP-AA-9.5	46425	-27.8645	-42.3059	-13.4231	0.000155748
KIRC	CDKN2AIP-AT-3	71268	-13.3885	-20.3291	-6.44794	0.000156321
KIRC	PCBP2-ES-15	22052	2.71086	1.3041	4.11763	0.000158798
KIRC	KLHL24-AT-9	67805	-2.22951	-3.38662	-1.07241	0.000159064
KIRC	ITGB1BP1-AP-2	52612	-3.76828	-5.72477	-1.81179	0.000160031
KIRC	FADS1-AP-9.1	16298	1.82926	0.877956	2.78057	0.00016403
KIRC	ZBTB25-AT-7.3	27882	2.70158	1.29654	4.10663	0.000164193
KIRC	NARF-AT-16	44395	-2.1828	-3.31867	-1.04692	0.000165598
KIRC	CEP44-AT-12.4	71185	8.46541	4.05696	12.8739	0.000167448
KIRC	RAP1B-ES-2	22958	1.59958	0.766275	2.43289	0.000168379
KIRC	TCF4-AP-18	45610	1.6419	0.785382	2.49842	0.000171866
KIRC	EFCAB11-AT-12	28799	-4.3323	-6.59315	-2.07144	0.000172841
KIRC	RFX3-AT-19	85744	-3.59701	-5.47423	-1.71978	0.000172961
KIRC	RERG-AT-6	20571	-26.0721	-39.6951	-12.449	0.000176124
KIRC	CEP85L-AT-17	77351	-3.67154	-5.5903	-1.75279	0.000176555
KIRC	RDH13-AT-10	52000	-2.06867	-3.14976	-0.987574	0.000176563
KIRC	XRN1-AT-42	67111	-6.51431	-9.91938	-3.10924	0.000177086
KIRC	ZNF652-AT-9	42294	4.38334	2.09187	6.67481	0.000177398
KIRC	ST8SIA1-AT-7	20726	-2.19255	-3.3393	-1.0458	0.000178688
KIRC	MPHOSPH9-AT-25	25051	-1.77125	-2.69816	-0.84434	0.000180154
KIRC	TRNT1-ES-4	62979	1.48499	0.707683	2.2623	0.000180848
KIRC	ZNF816-AT-6	51643	-2.24107	-3.41475	-1.06739	0.000182247
KIRC	GAPDH-AD-1.2	19876	477.386	227.254	727.519	0.000183541
KIRC	MARVELD3-AT-5	37465	4.1527	1.97664	6.32876	0.000183795
KIRC	ZNF226-RI-7.2	50292	1.51614	0.721451	2.31084	0.000184543
KIRC	GSTCD-AT-14	70254	-4.18837	-6.38448	-1.99226	0.000185487
KIRC	VEGFB-AA-6.1	16601	4.87242	2.31761	7.42723	0.000185519
KIRC	PARVA-AT-15	14431	-23.1697	-35.3202	-11.0193	0.000185894
KIRC	ABCC4-AT-34	26110	-6.97763	-10.6373	-3.31793	0.000186311
KIRC	VIM-RI-7.4	10929	22.0111	10.4632	33.5591	0.000187106
KIRC	CERS2-AT-11	7528	-17.1442	-26.1388	-8.14946	0.000187156
KIRC	EIF2AK4-AT-40	29934	24.7164	11.7468	37.686	0.00018761
KIRC	SLC30A5-AA-4.1	72303	1.6508	0.783981	2.51761	0.000189489
KIRC	RFX7-AT-9.2	30750	-2.42325	-3.69818	-1.14832	0.000195081
KIRC	ZNF724P-AT-4	48813	-3.1393	-4.79235	-1.48625	0.000197531
KIRC	MED19-RI-4.3	15888	4.05451	1.91833	6.1907	0.00019919
KIRC	HPS1-AT-20	12761	-2.80484	-4.28305	-1.32664	0.000200045
KIRC	C21orf33-AT-8	60805	-8.01445	-12.2432	-3.78569	0.000203545
KIRC	DAZAP2-AT-5	21811	-10.1042	-15.4378	-4.77072	0.000204726
KIRC	ZNF19-AT-8	37450	-2.50569	-3.82992	-1.18147	0.000208379
KIRC	ZNF765-AT-4	51718	-2.36977	-3.62291	-1.11662	0.000210226
KIRC	CLEC16A-AT-25	34004	-3.00619	-4.59706	-1.41532	0.000212524
KIRC	SERPINA1-AD-4.2	29102	31.8535	14.9906	48.7164	0.000213645
KIRC	MMAB-ES-5	24322	1.66518	0.783175	2.54718	0.000215336
KIRC	CMPK2-AT-5	52592	-6.51598	-9.96826	-3.0637	0.00021618
KIRC	SIRT2-ES-15.2:16:17	49708	-92.4943	-141.546	-43.4426	0.000219193
KIRC	KIF1B-AT-52.2	602	-2.97492	-4.55475	-1.39508	0.000223615
KIRC	FDFT1-AP-2.1	82641	-2.08176	-3.18777	-0.975744	0.000225066
KIRC	UCHL5-AT-15	9240	-4.54468	-6.96096	-2.1284	0.000227437
KIRC	ZRANB2-ES-10	3436	3.05251	1.42725	4.67776	0.000232191
KIRC	COG5-AT-22	81337	-6.82241	-10.463	-3.18184	0.000239757
KIRC	FMO5-AT-9	7369	-2.44949	-3.75677	-1.14222	0.000240234
KIRC	UQCC1-AT-13	59085	-3.01005	-4.61656	-1.40355	0.000240364
KIRC	CHTOP-AT-5	7746	-4.97134	-7.62644	-2.31624	0.00024275
KIRC	NPHP3-AT-48	66811	-2.54314	-3.90157	-1.18472	0.000243224
KIRC	DNAJC25-AT-7	87224	4.71164	2.19419	7.22909	0.000244212
KIRC	GGCT-AT-7	79123	-16.1407	-24.7761	-7.50532	0.000248855
KIRC	RAD51B-AT-13	28107	-2.40101	-3.68765	-1.11438	0.000254669
KIRC	GGPS1-AP-4	10346	1.78441	0.827271	2.74155	0.000258196
KIRC	SAMD12-AT-6	84992	-2.64555	-4.06504	-1.22605	0.000259356
KIRC	RIC8A-AP-1	13584	-5.37205	-8.25487	-2.48924	0.000259857
KIRC	RPL7L1-AT-6.3	76193	-15.8833	-24.418	-7.34855	0.00026478
KIRC	ABCB9-AP-1	24994	1.82654	0.844468	2.80861	0.000267076
KIRC	SAMD4B-AT-16.2	49802	-1.94923	-2.99764	-0.900825	0.000268402
KIRC	TM4SF19-AT-6	68239	-2.14977	-3.30615	-0.993395	0.00026876
KIRC	PPIE-AD-7.2	1904	1.53578	0.709317	2.36224	0.000270402
KIRC	PHF12-RI-12.2	40027	1.88531	0.870288	2.90033	0.000272154
KIRC	LAMTOR5-AP-1.1	4113	-5.74193	-8.83471	-2.64914	0.000273928
KIRC	C11orf1-ES-5	18689	-12.6836	-19.5161	-5.85107	0.000274341
KIRC	B2M-RI-2.4	30358	127.082	58.5853	195.58	0.000276569
KIRC	NCBP2-AP-1.1	68263	-6.10494	-9.39581	-2.81407	0.000276953
KIRC	MPHOSPH8-AT-15	25400	-4.76665	-7.33815	-2.19516	0.000280054
KIRC	INADL-RI-47.2	3240	-25.2906	-38.9347	-11.6464	0.000280186
KIRC	COX7C-RI-2.3	72713	52.7479	24.2881	81.2078	0.000280549
KIRC	CCSER2-AT-12	12408	-10.6833	-16.4495	-4.91711	0.000281975
KIRC	CHORDC1-AP-1.1	18260	-1.52328	-2.34592	-0.700638	0.00028424
KIRC	ACAT1-ES-5	18602	-10.4244	-16.0554	-4.79334	0.000285238
KIRC	HTRA2-ES-7	54103	7.56619	3.47611	11.6563	0.00028816
KIRC	NR5A2-AT-10	9327	-10.5388	-16.2385	-4.83899	0.000290155
KIRC	XYLB-AT-20	64044	-1.54878	-2.3869	-0.71066	0.000292489
KIRC	USP15-AT-23	22829	3.58478	1.64469	5.52487	0.000292895
KIRC	RPS16-RI-3.2	49829	84.2609	38.626	129.896	0.000295855
KIRC	CDC42-AT-9	1004	-24.9846	-38.5265	-11.4426	0.000299081
KIRC	TGIF1-AT-8.2	44505	-18.9272	-29.1985	-8.65592	0.000304218
KIRC	EEF1E1-AT-4	75282	-2.00694	-3.09622	-0.917656	0.00030488
KIRC	SLC25A35-AT-5.3	39149	-2.46528	-3.80347	-1.12709	0.000305318
KIRC	BRI3-AT-3	80586	-17.4724	-26.9581	-7.98677	0.000305937
KIRC	KIF4A-AT-32	89373	1.67439	0.765066	2.58371	0.000307387
KIRC	LRRC37A-AP-2	42022	-2.70292	-4.17087	-1.23498	0.000307531
KIRC	TSPAN17-RI-7.5	74669	2.40452	1.09854	3.71049	0.00030784
KIRC	LYRM5-AT-3.4	20810	3.72914	1.70191	5.75637	0.000311669
KIRC	MRPL21-AD-5.2	17341	11.7273	5.34655	18.108	0.000315468
KIRC	NFKBIB-RI-5.2	49718	-2.79444	-4.31491	-1.27398	0.000315536
KIRC	C22orf39-AT-3	61054	-3.94948	-6.09919	-1.79976	0.000317162
KIRC	LRRC32-RI-4.2	17899	-5.05404	-7.80575	-2.30233	0.000318405
KIRC	SMTN-AD-21.2	61812	-27.0408	-41.7744	-12.3072	0.00032172
KIRC	RPL26-ES-3	39177	373.712	169.989	577.435	0.000323911
KIRC	ATP6V1D-AT-9.2	28049	-2.10761	-3.25701	-0.958218	0.000325727
KIRC	NAA10-AA-8.1:8.2	90535	23.3081	10.5947	36.0214	0.000326517
KIRC	CEP57-AT-13	18390	-5.49729	-8.49599	-2.49859	0.000326831
KIRC	EDF1-RI-4.2:4.3	88230	7.02206	3.18853	10.8556	0.00033047
KIRC	C4orf29-AT-15	70558	-4.52023	-6.98894	-2.05152	0.000332317
KIRC	KIAA1109-AT-87	70517	-30.2264	-46.7346	-13.7181	0.000332366
KIRC	RNF149-AT-7	54741	-2.90439	-4.49673	-1.31206	0.000350316
KIRC	SSB-ES-6	55885	1.56973	0.708362	2.43111	0.000354579
KIRC	CCDC41-AT-18	23728	3.60512	1.62429	5.58595	0.0003609
KIRC	SERP1-AT-4	67273	-13.5892	-21.0561	-6.12229	0.000361122
KIRC	NUMA1-ES-4	17518	4.51427	2.03214	6.9964	0.000364404
KIRC	CHCHD7-AT-6	83901	-16.7984	-26.0401	-7.55675	0.000367219
KIRC	SETD3-AT-14	29213	-12.6369	-19.5918	-5.68194	0.000369184
KIRC	LUC7L3-RI-12.3:12.4:12.5	42474	1.29854	0.583784	2.0133	0.000369762
KIRC	LAMTOR4-RI-3.2	80902	8.09458	3.63794	12.5512	0.000371035
KIRC	RPS27L-AP-2	31014	-5.7496	-8.92045	-2.57874	0.000379513
KIRC	DHX30-ES-4	64544	1.48962	0.667038	2.31221	0.000386247
KIRC	TMEM107-RI-3.3	39110	1.60922	0.719582	2.49885	0.000392187
KIRC	NDUFA2-AA-3.1	73706	20.2504	9.05415	31.4467	0.000392704
KIRC	HNRNPA1-ES-8	22146	14.2628	6.36863	22.157	0.000398371
KIRC	C19orf44-AT-10	48169	-3.55774	-5.52716	-1.58832	0.000399129
KIRC	MYL9-ES-3	59288	-16.4975	-25.6299	-7.3651	0.000399162
KIRC	PIN1-AT-4.3	47441	-8.25436	-12.8252	-3.68353	0.000400955
KIRC	PHB2-ES-5.3:6.1	20045	-62.1809	-96.6138	-27.7479	0.000401026
KIRC	GPS2-AT-11	38913	-2.24757	-3.49253	-1.00261	0.000402563
KIRC	WTAP-AT-7.2	78313	-2.48441	-3.86248	-1.10634	0.000410164
KIRC	S1PR3-AP-2.1	86791	1.12542	0.501056	1.74978	0.000411095
KIRC	SLCO3A1-AT-10.2	32546	-3.48472	-5.41822	-1.55121	0.0004118
KIRC	NIT1-AT-7	8556	3.63965	1.6189	5.66041	0.000415311
KIRC	GUK1-AD-11.3	10182	25.3427	11.2669	39.4184	0.000417418
KIRC	POLR2J3-RI-4.4	81112	1.41989	0.630343	2.20943	0.000423926
KIRC	CTNS-AT-13.3	38471	-2.60117	-4.04861	-1.15374	0.00042793
KIRC	TMEM213-AT-3	81931	-1.86381	-2.90163	-0.825991	0.000431734
KIRC	NCOR1-AT-46	39416	-13.7847	-21.4621	-6.1072	0.000433078
KIRC	FAT3-AT-28	18278	-1.21902	-1.89881	-0.539235	0.000440269
KIRC	TMEM185A-AT-9	90319	-5.15784	-8.03468	-2.28101	0.000441424
KIRC	SMAD2-AT-12	45450	-5.86252	-9.13639	-2.58866	0.000448586
KIRC	RPS6-RI-1.2:1.3	85973	166.858	73.6693	260.048	0.000449144
KIRC	ZNF347-AD-1.2	51696	4.07905	1.80078	6.35731	0.000449523
KIRC	CUX1-AT-25	81070	-4.85525	-7.57203	-2.13846	0.000460549
KIRC	RPS15A-ES-3.2:3.3	34261	509.08	223.995	794.164	0.000465366
KIRC	SRSF1-RI-3.4	42631	-24.5127	-38.2557	-10.7698	0.000472457
KIRC	GLE1-AT-16	87767	-13.7953	-21.5303	-6.06032	0.000473017
KIRC	ZNF197-AT-7	64376	-3.96827	-6.19407	-1.74247	0.000475262
KIRC	NAF1-AT-8	71008	2.46827	1.08382	3.85273	0.000475281
KIRC	ASTN2-AT-21	87369	1.62612	0.713796	2.53845	0.000476872
KIRC	TYK2-AT-25	47509	-10.4256	-16.2785	-4.57263	0.000480868
KIRC	NFS1-AT-16	59214	-1.87028	-2.92027	-0.820298	0.00048089
KIRC	DNASE1L1-AP-2.1	90573	1.6567	0.726418	2.58698	0.000482271
KIRC	LLGL2-AT-28.2	43460	3.06378	1.34307	4.78448	0.000483401
KIRC	TMEM59-AD-1.2	3121	-15.2974	-23.8904	-6.70447	0.000484497
KIRC	ETHE1-AT-7	50199	-4.75847	-7.43172	-2.08521	0.000485212
KIRC	CACNA2D4-AT-40	19676	-1.92177	-3.00194	-0.841596	0.000488413
KIRC	IFT43-AT-11.2	28534	5.92372	2.59328	9.25417	0.000490111
KIRC	CDC14B-AT-16	86974	-2.34397	-3.6621	-1.02583	0.000491581
KIRC	KIAA1257-AT-8.2	66689	-2.71713	-4.24543	-1.18883	0.000492916
KIRC	SURF4-AT-7.2	88036	-44.7962	-70.0061	-19.5863	0.000496358
KIRC	MRPL4-RI-6.2	47485	3.36747	1.47158	5.26336	0.00049903
KIRC	ERG-AT-14	60591	-7.99235	-12.4927	-3.492	0.000499963
KIRC	CDV3-AA-7.1:7.2:7.3	66838	6.40343	2.78962	10.0172	0.000514826
KIRC	STEAP4-AT-6	80361	-1.6746	-2.62003	-0.729174	0.000517335
KIRC	FGD4-AT-22	21032	-5.59222	-8.75054	-2.4339	0.000519733
KIRC	BSG-ES-3	46304	-27.622	-43.2314	-12.0126	0.000523749
KIRC	GCDH-ME-4|5	47884	-1.50645	-2.35791	-0.654997	0.000524935
KIRC	STAU1-ES-0.0854166666666667	59741	6.52037	2.83079	10.21	0.000532752
KIRC	TOM1L1-AT-19	42538	-3.54371	-5.55108	-1.53633	0.000540167
KIRC	ACTB-ES-4	78668	612.145	265.132	959.159	0.000545308
KIRC	PSMC5-ES-3	43008	-142.607	-223.511	-61.7019	0.000550849
KIRC	AP2S1-ES-3.2	50606	-36.5172	-57.2439	-15.7906	0.000554048
KIRC	IFNAR2-ES-0.00636689814814815	60391	8.09739	3.50022	12.6946	0.000555929
KIRC	SLC30A7-AT-12	3893	3.44083	1.48723	5.39443	0.000556379
KIRC	MACF1-ES-107	1881	-2.60366	-4.08222	-1.1251	0.000557734
KIRC	NOVA1-AT-7	27045	-1.65552	-2.5957	-0.715343	0.000558061
KIRC	OGFOD3-ES-9	44324	-2.54597	-3.99204	-1.09991	0.000559025
KIRC	RGS12-AP-2	68633	1.31924	0.569873	2.0686	0.000559623
KIRC	ZNF283-AT-10	50248	-4.92191	-7.71825	-2.12557	0.000561033
KIRC	PTPLAD2-AT-7.4	85992	-2.15973	-3.3868	-0.932654	0.000561288
KIRC	PLIN2-AD-5.2	85963	-293.214	-459.81	-126.618	0.000561437
KIRC	GABPB1-AT-10	30572	-3.12801	-4.90662	-1.34939	0.000566971
KIRC	SUFU-AT-13	12962	-4.92164	-7.72123	-2.12205	0.000569821
KIRC	ITGB3-AT-15	42067	-1.55642	-2.44184	-0.671003	0.000570435
KIRC	PDXDC1-AT-26	34113	-2.58319	-4.05275	-1.11363	0.000570601
KIRC	CCNC-AT-14	77075	-2.53818	-3.98215	-1.09421	0.000570681
KIRC	CAMKK1-AT-18	38494	-12.1039	-18.9915	-5.21632	0.000572445
KIRC	PAPOLA-RI-9.2	29208	1.49128	0.642664	2.33989	0.000572607
KIRC	STARD10-AD-3.2:3.3	17646	-27.2438	-42.7488	-11.7387	0.00057353
KIRC	HSBP1-RI-1.2	37796	45.9654	19.8043	72.1265	0.000573842
KIRC	CCNH-RI-8.2	72726	3.02476	1.30297	4.74656	0.000574951
KIRC	OPA3-AT-3	50489	-3.79916	-5.96376	-1.63456	0.000581705
KIRC	NDUFB9-AA-2.1	85104	-69.6463	-109.358	-29.9347	0.000587353
KIRC	CHCHD1-RI-2.2	12230	7.55468	3.24658	11.8628	0.000588217
KIRC	OTUB1-AT-8.4	16556	-11.3345	-17.8031	-4.86587	0.000594069
KIRC	SH3BGRL3-RI-2.2	1246	-32.1561	-50.5208	-13.7914	0.000599474
KIRC	TRIM7-AT-8	75046	1.84832	0.792501	2.90414	0.000601098
KIRC	AP4S1-AT-9	27100	-2.98841	-4.6965	-1.28032	0.000605621
KIRC	ZFP14-AT-5	49378	-3.34933	-5.26375	-1.43491	0.000605774
KIRC	CLN3-ES-16	35720	6.5277	2.79618	10.2592	0.000606597
KIRC	SLC2A13-AT-10	21085	-7.62612	-11.9886	-3.26367	0.000611933
KIRC	LRRC8C-AT-5	3725	-15.6039	-24.5312	-6.67665	0.000612973
KIRC	NR4A3-AT-9	87062	-3.54441	-5.57519	-1.51362	0.000624383
KIRC	ADAL-AT-13	30234	-2.35066	-3.698	-1.00332	0.000627379
KIRC	SUMO1-RI-8.2	56930	-29.3489	-46.1745	-12.5234	0.000629021
KIRC	IMPA2-AT-11	44659	-2.889	-4.54618	-1.23182	0.000633484
KIRC	ERBB3-AT-29	22357	-1.87138	-2.94498	-0.797779	0.000634577
KIRC	ARMC8-AT-23	66960	-3.4703	-5.46128	-1.47932	0.000634933
KIRC	KBTBD3-AT-5	18556	-3.64261	-5.73511	-1.55012	0.000645113
KIRC	CHTF8-RI-4.5	37262	-11.8419	-18.6489	-5.03484	0.000650435
KIRC	PCTP-AT-6.2	42587	-9.70235	-15.2848	-4.1199	0.00065817
KIRC	PCMT1-AT-10	78104	-3.31733	-5.22667	-1.40798	0.000660965
KIRC	TMED2-AP-1	25081	-1.7575	-2.7697	-0.745297	0.000666234
KIRC	SLC25A24-AT-11	3937	-12.7234	-20.0548	-5.39204	0.000670259
KIRC	RBPMS-AT-16	83290	-4.09136	-6.45071	-1.73201	0.000676875
KIRC	RBM15-AT-3	4102	2.39385	1.01283	3.77486	0.000680341
KIRC	CDC16-RI-18.2	26405	-6.7224	-10.6036	-2.84122	0.000686901
KIRC	DNMT3A-AT-27	52856	3.70261	1.56489	5.84034	0.000686975
KIRC	NPC2-RI-4.3	28401	3.16012	1.33551	4.98473	0.000687437
KIRC	PLCB3-AT-31.2	16608	6.16634	2.60428	9.7284	0.000691498
KIRC	ZNF771-AT-4	36105	2.1557	0.909683	3.40172	0.000696692
KIRC	SLC35A2-AT-5.3	89034	-2.24558	-3.54436	-0.946802	0.000702085
KIRC	SUMO3-AT-5	60835	-1.78775	-2.82288	-0.752621	0.000711749
KIRC	HMGB1-AP-2	25568	-3.98996	-6.30184	-1.67807	0.000718037
KIRC	C5orf45-AT-8	74942	-7.02685	-11.1003	-2.95344	0.000722109
KIRC	C11orf57-AT-5.2	18720	-6.52797	-10.3134	-2.74256	0.000724935
KIRC	HSPE1-RI-3.2	56694	4.38606	1.84203	6.9301	0.000727245
KIRC	PHF3-AT-18	76603	-4.92334	-7.78045	-2.06622	0.000731804
KIRC	KRAS-AT-7	20818	-15.9282	-25.1889	-6.6675	0.000748697
KIRC	PIGV-RI-4.2	1301	-12.2792	-19.422	-5.13637	0.000753424
KIRC	TMEM120B-RI-12.2	24893	-5.61651	-8.88432	-2.3487	0.000755341
KIRC	TRIB3-AP-1	58448	2.49224	1.04175	3.94272	0.00075816
KIRC	CCND1-AT-5	17363	-43.8355	-69.385	-18.2859	0.000771801
KIRC	RCOR3-AT-15	9708	-4.13615	-6.54861	-1.72369	0.000778432
KIRC	ATP6V0B-RI-7.2	2509	4.52812	1.8734	7.18284	0.000828523
KIRC	WRB-AT-6	60628	-16.0207	-25.4153	-6.62613	0.000830719
KIRC	CELF2-RI-16.2	10739	1.36656	0.565026	2.1681	0.000832973
KIRC	LIN9-AT-15	10012	-5.62095	-8.92184	-2.32006	0.000845222
KIRC	ZNF326-AT-12	3728	2.78533	1.14902	4.42164	0.000849165
KIRC	LMNA-RI-19.2	8182	-68.7648	-109.163	-28.3671	0.000849198
KIRC	CSNK1E-AT-18	62232	-2.49206	-3.95694	-1.02717	0.000855186
KIRC	DUT-RI-6.2:6.3:6.4	30493	21.531	8.86859	34.1934	0.00086009
KIRC	ARL1-AT-8	23946	-18.8956	-30.0294	-7.76169	0.000880058
KIRC	HIPK1-AT-19	4316	-19.528	-31.051	-8.00489	0.000895292
KIRC	SDHC-ES-0.0854166666666667	8665	-17.2676	-27.4624	-7.07276	0.000901115
KIRC	BAX-RI-6.2	50836	2.71771	1.11268	4.32274	0.000904369
KIRC	RPL3-AP-1	62289	-196.1	-311.989	-80.21	0.000911513
KIRC	ADAM28-AT-25	83088	-2.2808	-3.62887	-0.932739	0.000912895
KIRC	LSM4-ES-4	48416	17.3295	7.08359	27.5754	0.00091643
KIRC	ZNF415-AT-9	51662	-4.72619	-7.52371	-1.92868	0.000928923
KIRC	SAR1B-ES-6	73418	1.51782	0.618836	2.41681	0.000935804
KIRC	PUS10-AT-4.2	53676	1.98902	0.810645	3.16739	0.000938662
KIRC	APP-ES-9	60288	-17.8591	-28.4579	-7.2602	0.000958155
KIRC	COX17-AT-5	66349	3.4672	1.40768	5.52671	0.00096823
KIRC	NDUFAF1-ES-4	30087	1.71787	0.697427	2.7383	0.000968509
KIRC	BTN3A2-AT-12	75612	-2.26325	-3.60892	-0.917586	0.000979222
KIRC	LDLRAD3-ES-5	15419	1.5912	0.644474	2.53792	0.000987052
KIRC	ECI2-ES-0.297222222222222	75220	-70.7877	-112.931	-28.6439	0.000994442
KIRC	KDELR1-AP-1	50766	-6.6996	-10.6889	-2.71029	0.000996402
KIRC	KIF16B-AT-27	58720	2.00409	0.810279	3.19791	0.00100098
KIRC	SLC18B1-AT-14	77750	-6.35486	-10.1514	-2.55833	0.00103547
KIRC	NGFRAP1-AP-1	89730	-1.96322	-3.13664	-0.789807	0.00104108
KIRC	SUGT1-ES-7	26006	-2.81425	-4.49646	-1.13204	0.00104208
KIRC	TPM2-AA-11.1	86277	6.08951	2.44897	9.73005	0.00104389
KIRC	CERCAM-RI-3.2	87747	1.14888	0.462021	1.83573	0.00104413
KIRC	HNRNPA2B1-RI-12.3	79033	2.42826	0.976451	3.88007	0.00104475
KIRC	MAPKAP1-AT-15	87579	-4.06732	-6.50104	-1.63359	0.00105455
KIRC	ANXA4-AD-6.2	53859	-10.6941	-17.0983	-4.28988	0.00106468
KIRC	EXOSC9-RI-10.2:10.3:10.4	70502	2.68754	1.07805	4.29703	0.00106502
KIRC	TIMM9-AA-6.1	27707	-37.5054	-59.9669	-15.0439	0.00106533
KIRC	RANBP1-AA-7.3	61139	-5.53824	-8.8599	-2.21658	0.00108359
KIRC	DSG2-AT-15	45010	-19.6701	-31.4734	-7.8669	0.00108967
KIRC	RAVER2-AT-12	3279	-20.9839	-33.5877	-8.38	0.00110201
KIRC	RDX-AT-15.3	18630	-7.46089	-11.9423	-2.9795	0.00110213
KIRC	TUBGCP2-AA-17.1	13533	-14.2259	-22.773	-5.67885	0.0011055
KIRC	MUM1-AT-15	46452	-4.4217	-7.07837	-1.76503	0.00110583
KIRC	ZFP64-AT-6	59813	-2.28762	-3.66237	-0.912869	0.00110851
KIRC	ST6GAL2-AT-8	54866	-1.03071	-1.65089	-0.410518	0.00112473
KIRC	FKBP11-AP-1	21492	-4.21013	-6.74493	-1.67534	0.00113242
KIRC	CHMP3-AP-4	54438	-20.069	-32.1555	-7.98252	0.00113624
KIRC	MYO19-AA-21.1	40482	1.54057	0.611729	2.46942	0.00115089
KIRC	CHD6-AT-38	59424	-6.16743	-9.88656	-2.44831	0.00115319
KIRC	WDR19-AT-37	69047	27.4836	10.9017	44.0655	0.00116004
KIRC	C7orf49-AD-1.2	81878	1.64753	0.652315	2.64275	0.00117606
KIRC	RPS7-AT-7	52570	-44.9492	-72.139	-17.7594	0.00119472
KIRC	TM9SF1-AT-10	26894	8.01912	3.16229	12.876	0.00121176
KIRC	43345-ES-8	58357	1.57095	0.619375	2.52252	0.00121345
KIRC	NNMT-AD-5.3	18818	-33.1356	-53.2089	-13.0622	0.00121492
KIRC	EBPL-AT-6	25899	-1.82386	-2.92875	-0.718967	0.00121498
KIRC	TIAL1-AT-13	13267	-6.3627	-10.2214	-2.504	0.00123001
KIRC	PSMD2-AP-1.1	67867	-5.69519	-9.1498	-2.24058	0.00123292
KIRC	STOM-ES-4:5:6:7	87439	-169.049	-271.617	-66.4797	0.00123657
KIRC	TINAGL1-ES-3	1479	-53.9082	-86.6212	-21.1953	0.00123852
KIRC	FOSL2-AP-2	53057	-4.55065	-7.31252	-1.78878	0.00124061
KIRC	PFN1-AP-1	38615	-7.92073	-12.7305	-3.11097	0.001248
KIRC	ATF7-AT-13.2	22094	-1.96745	-3.16218	-0.772718	0.00124828
KIRC	GNAS-ES-6	60005	-4.55262	-7.31753	-1.7877	0.00125002
KIRC	IL11RA-AT-15	86210	-2.47324	-3.97561	-0.970874	0.00125293
KIRC	DDA1-RI-5.2:5.3	48277	22.4885	8.82326	36.1537	0.0012577
KIRC	SIAH1-AT-8.3	36342	-3.07839	-4.95104	-1.20575	0.00127329
KIRC	CSTF3-AT-22	14883	-2.80935	-4.51881	-1.09989	0.00127731
KIRC	FBXO4-ES-0.0854166666666667	71890	2.73537	1.07067	4.40007	0.00127951
KIRC	NOC3L-AT-22	12584	-15.1873	-24.4358	-5.93882	0.00128848
KIRC	ECHDC2-AT-14	3022	-1.63101	-2.62456	-0.63746	0.00129325
KIRC	PWWP2A-AT-4	74409	3.39054	1.32514	5.45594	0.0012933
KIRC	ZNF486-AT-5	48718	-6.0123	-9.67746	-2.34714	0.00130396
KIRC	LINS-AT-7	32734	2.49288	0.972868	4.01289	0.00130708
KIRC	GTPBP8-AT-8.2	66126	-1.80359	-2.90355	-0.703631	0.00131024
KIRC	THY1-AP-1	19142	-4.97048	-8.00194	-1.93901	0.00131074
KIRC	BCL7C-AT-6	36193	30.5203	11.9012	49.1394	0.00131466
KIRC	ZC3H15-AT-11	56481	-19.5846	-31.548	-7.62124	0.00133404
KIRC	NFASC-AT-37	9492	-2.24459	-3.61586	-0.873327	0.0013356
KIRC	FAM221A-ES-3.1:3.2:3.3	78990	1.84053	0.716091	2.96497	0.00133591
KIRC	SLC39A9-RI-7.2	28145	-13.8126	-22.2554	-5.36984	0.00134333
KIRC	CDKN2AIPNL-AT-4	73398	-10.4976	-16.9152	-4.08006	0.00134574
KIRC	CBFA2T2-AP-15	58987	3.34271	1.29879	5.38662	0.00134874
KIRC	SCIMP-AT-6	38667	-1.66579	-2.6847	-0.646878	0.00135396
KIRC	PDDC1-ES-7:8.1:8.2	13745	-7.11239	-11.4671	-2.75773	0.0013687
KIRC	HIBCH-ES-14	56560	-8.12697	-13.1042	-3.1497	0.00137303
KIRC	MKL1-AT-15	62350	-8.86264	-14.2912	-3.43411	0.00137501
KIRC	RAB3IP-AD-8.2	23354	1.28188	0.496339	2.06743	0.00138217
KIRC	ZNF559-AT-6.4	47274	-1.89293	-3.05357	-0.732287	0.00139072
KIRC	RGS1-AT-5	9234	-3.80901	-6.14981	-1.46821	0.00142618
KIRC	CERS5-AA-6.1	21680	7.35704	2.83242	11.8817	0.00143805
KIRC	ELAC1-AT-4	45555	-1.79463	-2.89851	-0.690757	0.00144043
KIRC	DSTN-ES-5	58733	79.1118	30.4162	127.807	0.00145158
KIRC	SAT1-ES-2.3	88700	-34.2764	-55.3902	-13.1627	0.00146339
KIRC	CD2BP2-AP-1	36096	-9.33403	-15.0851	-3.58293	0.00146759
KIRC	MAP3K11-AP-1	16883	-4.87203	-7.8755	-1.86855	0.00147622
KIRC	MTMR6-AT-14	25493	-47.8424	-77.3393	-18.3455	0.00147804
KIRC	RPS25-AA-3.1	19055	-171.186	-276.777	-65.5951	0.00148534
KIRC	MBD1-RI-18.2:18.3	45508	2.73476	1.04765	4.42187	0.00148785
KIRC	CS-ES-6	22418	1.36409	0.521782	2.2064	0.00150304
KIRC	RPS5-ES-3	52446	369.056	140.944	597.169	0.0015193
KIRC	ZNF135-AT-7	52390	3.40902	1.30129	5.51674	0.00152422
KIRC	ACSS1-ES-12.2:13:14:15.1	58861	-10.515	-17.0188	-4.01112	0.00153107
KIRC	ERICH1-AT-6	82553	-2.2599	-3.65789	-0.861906	0.00153311
KIRC	OCIAD1-ES-5	69234	1.45985	0.556657	2.36304	0.00153529
KIRC	PPFIA1-AT-29	17393	-11.191	-18.1171	-4.26493	0.00154089
KIRC	GGNBP2-AT-14	40493	13.4005	5.10642	21.6947	0.00154206
KIRC	WDR78-AT-18	3330	-1.60627	-2.60051	-0.612033	0.00154297
KIRC	PGAP1-AT-29	56662	-7.54715	-12.2229	-2.8714	0.00155836
KIRC	SNAPC3-RI-9.2	85916	2.02792	0.771309	3.28454	0.00156159
KIRC	COX5A-ES-0.00283680555555556	31811	-72.5733	-117.544	-27.6022	0.00156182
KIRC	SSR3-AD-6.2	67362	37.0314	14.0831	59.9796	0.00156273
KIRC	GPATCH8-AT-11	41868	-1.69441	-2.74468	-0.644151	0.0015666
KIRC	INO80B-AT-8	54060	-4.29933	-6.96644	-1.63222	0.00158082
KIRC	SERPINA1-AT-6	29101	-11.3191	-18.349	-4.28913	0.00160067
KIRC	MRPL51-AP-2	19869	-6.56677	-10.6459	-2.48764	0.00160366
KIRC	OS9-ES-5.1:5.2:5.3:6:7.1:7.4:8:9.1	22710	28.7456	10.8889	46.6022	0.00160417
KIRC	CEP78-AT-17	86655	-2.42589	-3.93372	-0.91806	0.0016143
KIRC	C9orf85-AT-6	86576	5.58293	2.11258	9.05329	0.00161551
KIRC	SLIRP-AT-4.2	28617	7.15297	2.70422	11.6017	0.00162519
KIRC	PIAS2-AT-15	45421	3.39183	1.28033	5.50333	0.00164164
KIRC	POLR2J3-RI-4.2	81116	1.75838	0.663041	2.85373	0.00165303
KIRC	TMEM234-AT-7	1568	-3.05887	-4.96448	-1.15326	0.00165456
KIRC	PARL-ES-6	67809	-7.81721	-12.6884	-2.94604	0.00165897
KIRC	TXNDC12-AT-9	2989	32.6801	12.3064	53.0538	0.00166744
KIRC	DGKB-AT-28	78844	-10.9762	-17.8243	-4.128	0.00168136
KIRC	ENDOV-AT-13	44054	-1.71703	-2.78835	-0.645707	0.00168215
KIRC	NIF3L1-ES-6	56772	-10.1618	-16.5022	-3.82135	0.00168243
KIRC	ITFG3-AT-13.2	32854	-20.7908	-33.7683	-7.81339	0.00168942
KIRC	PMF1-AT-9	8195	-10.804	-17.5483	-4.05981	0.00169064
KIRC	ZNF263-AT-7	33509	-7.54602	-12.2585	-2.83355	0.00169834
KIRC	THOC3-AT-7	74619	-9.7984	-15.9209	-3.67593	0.00170846
KIRC	EGFR-AT-32	79744	-3.82602	-6.21705	-1.43499	0.00171123
KIRC	MTMR1-AA-19.1:19.2	90352	-29.4569	-47.8786	-11.0352	0.00172417
KIRC	TMTC2-AT-14	23563	-2.59093	-4.21421	-0.96765	0.00175813
KIRC	HGSNAT-AP-12	83760	5.69396	2.12357	9.26435	0.00177382
KIRC	MANEA-AT-5	77024	-9.89198	-16.0953	-3.6887	0.00177545
KIRC	CREB3L2-AT-13	81911	-1.61763	-2.63213	-0.603133	0.00177689
KIRC	FAM122B-AA-10.1	90156	-4.12647	-6.71674	-1.53621	0.00179409
KIRC	TTC17-AT-27	15454	2.40896	0.896664	3.92126	0.00179594
KIRC	FAM21A-ES-30.2:31:32.1	11558	25.9519	9.65749	42.2464	0.00179867
KIRC	CFH-AT-23	9275	3.72374	1.38418	6.0633	0.00181123
KIRC	ATG10-ES-2	72684	1.79374	0.666255	2.92123	0.00181993
KIRC	COL6A2-AT-29	60897	4.01438	1.48963	6.53914	0.00183096
KIRC	C8orf59-ES-5	84333	-9.59871	-15.6373	-3.56007	0.0018366
KIRC	RPL30-AA-3.1	84637	50.1056	18.5775	81.6336	0.00184041
KIRC	MRPL4-AT-7.2	47481	-3.5947	-5.85699	-1.33241	0.00184376
KIRC	ZNF696-AT-4	85410	-3.14497	-5.12485	-1.1651	0.00184979
KIRC	RHBDF1-AT-18	32789	-5.18497	-8.44951	-1.92042	0.00185232
KIRC	SNX20-AT-4	36382	-6.7635	-11.0244	-2.5026	0.00186373
KIRC	CAST-RI-37.2	72851	-127.635	-208.072	-47.1981	0.0018708
KIRC	RNASEH2B-AT-12	25927	-2.10948	-3.43996	-0.779002	0.00188655
KIRC	COPS5-ES-10	84058	9.18395	3.38718	14.9807	0.0019014
KIRC	ACP2-AT-12	15679	-13.0914	-21.3654	-4.81735	0.00192801
KIRC	QRSL1-AT-11	77122	-5.67635	-9.26418	-2.08851	0.00192948
KIRC	CSNK1D-ES-0.00142592592592593	44311	1.08533	0.399282	1.77137	0.00193081
KIRC	CCDC69-AT-10	74158	-23.9269	-39.0562	-8.79763	0.00193733
KIRC	C17orf62-AT-9.2	44338	-15.6307	-25.5176	-5.74377	0.0019444
KIRC	PRKCA-AT-19	43100	-1.76026	-2.87477	-0.645745	0.0019644
KIRC	LITAF-AT-10	34017	-27.7672	-45.3669	-10.1674	0.0019865
KIRC	TMEM41B-RI-7.2	14311	-5.70366	-9.32009	-2.08724	0.00199372
KIRC	NAPEPLD-RI-6.4	81171	-16.5124	-26.9865	-6.03819	0.00200257
KIRC	ARID2-AT-22	21310	-6.00479	-9.81391	-2.19567	0.00200337
KIRC	STAU2-AT-18.2	84155	-1.93574	-3.16443	-0.707054	0.0020162
KIRC	MOBP-AT-8	64191	1.62038	0.591562	2.6492	0.00202237
KIRC	MOK-AT-17.4	29371	-2.13453	-3.49006	-0.779004	0.00202645
KIRC	ST7L-AT-18	4205	-2.36913	-3.87522	-0.863037	0.00204867
KIRC	MFAP3L-AT-7	71161	-2.93921	-4.80812	-1.0703	0.00205333
KIRC	RPS5-RI-2.2	52447	325.551	118.435	532.666	0.00206492
KIRC	HINT1-ES-2.2:2.3:3.1:3.2	73216	37.403	13.5726	61.2334	0.00209612
KIRC	KIAA0513-AT-14	37878	-2.61113	-4.27604	-0.946225	0.00211294
KIRC	RPL35-ES-4.1:4.2	87539	100.184	36.3039	164.063	0.00211319
KIRC	SPOCK2-AT-14	12071	-15.0822	-24.702	-5.46245	0.0021199
KIRC	PSMA7-AT-8	60043	-7.52002	-12.3207	-2.71933	0.00213932
KIRC	SUGP2-ES-13	48547	2.17918	0.787051	3.57131	0.00215465
KIRC	RPS6KA5-AT-19	28832	-6.16379	-10.1088	-2.21881	0.00219624
KIRC	TFPI-AT-10	56494	-6.5223	-10.697	-2.34765	0.00219744
KIRC	NDUFA13-RI-4.2	48651	18.9482	6.7898	31.1066	0.00225438
KIRC	TXN2-AP-1	62048	-3.28976	-5.40116	-1.17836	0.00225959
KIRC	ARMC6-AT-11.2	48561	19.9577	7.14835	32.7671	0.00226014
KIRC	OSMR-AT-18	71850	-4.21918	-6.92773	-1.51064	0.0022649
KIRC	TIMP1-RI-3.4	88927	32.7426	11.7181	53.7671	0.00227048
KIRC	RPS13-AA-5.1	14513	-106.204	-174.404	-38.0035	0.00227229
KIRC	PSMD1-ES-21	57923	-27.3868	-44.9748	-9.79874	0.0022739
KIRC	SRSF6-ES-3	59434	1.49497	0.532148	2.45779	0.00234055
KIRC	EEF2K-AT-18	35542	-8.64053	-14.209	-3.07209	0.00235581
KIRC	HNRNPA1-ES-6.2:7.1:7.2:9.1	22149	27.422	9.7415	45.1024	0.00236692
KIRC	PGLS-ES-3	48324	10.7324	3.80813	17.6567	0.00238251
KIRC	LAMTOR5-AD-1.2:1.3	4115	8.60999	3.05498	14.165	0.00238274
KIRC	FAM162A-AT-6	66434	-6.35448	-10.4555	-2.25347	0.00238987
KIRC	MAGI2-AT-25	80214	-4.83275	-7.95214	-1.71337	0.0023934
KIRC	REEP5-ES-4	72994	8.15628	2.88819	13.4244	0.00240934
KIRC	GAPDH-AD-5.2	19875	69.2809	24.526	114.036	0.00241302
KIRC	TPGS2-AT-10	45264	-2.8085	-4.62413	-0.992881	0.00243117
KIRC	RMDN1-ES-6	84377	1.42516	0.503791	2.34653	0.00243225
KIRC	SNF8-ES-6	42249	10.5283	3.71848	17.3382	0.002444
KIRC	ITGB1BP1-ES-8.1	52618	-12.5134	-20.6119	-4.4148	0.00245847
KIRC	RPS23-AT-3.9	72688	-6.38235	-10.5141	-2.25056	0.00246547
KIRC	MON2-AT-39	22834	-11.0806	-18.2547	-3.90638	0.00246852
KIRC	FLT4-AT-31	75016	-1.8859	-3.10726	-0.66454	0.00247504
KIRC	EYA3-AT-19	1367	-10.4888	-17.2826	-3.69505	0.0024784
KIRC	SRSF2-RI-2.6	43660	-3.76584	-6.20626	-1.32542	0.0024909
KIRC	ACOT9-ES-12	88693	-6.65891	-10.9755	-2.34232	0.00249865
KIRC	ADAMTS4-AT-8	8590	-2.93606	-4.84171	-1.03042	0.00252978
KIRC	ZNF569-AT-7	49515	-1.57065	-2.59035	-0.550957	0.00253643
KIRC	POLR2J2-RI-3.2	81127	1.64367	0.576535	2.7108	0.00253724
KIRC	PCGF5-AT-12	12510	-1.98963	-3.28168	-0.697588	0.0025431
KIRC	RQCD1-AT-12.3	57493	1.60614	0.563057	2.64921	0.00254484
KIRC	SPATA6L-AT-16.2	85753	-1.47423	-2.43166	-0.516808	0.00254506
KIRC	AR-AT-11	89348	-5.54785	-9.15174	-1.94396	0.0025514
KIRC	ENY2-ES-5	84886	22.8005	7.98567	37.6154	0.00255757
KIRC	SLC23A3-AT-12.2	57594	-1.21292	-2.00123	-0.424615	0.00256404
KIRC	TPT1-ES-1.4	25801	173.276	60.6548	285.897	0.00256513
KIRC	SUGP2-RI-12.4	48550	1.37697	0.481284	2.27265	0.00258572
KIRC	USP36-AT-21.4	43913	-3.28644	-5.42716	-1.14573	0.00262152
KIRC	TTC9C-AT-4	16415	-1.83373	-3.0282	-0.639265	0.00262183
KIRC	MAPK8-AT-15.2	11473	-13.1161	-21.6668	-4.56536	0.00264344
KIRC	PLA2G16-AP-2.1	16517	2.43111	0.842086	4.02014	0.00271203
KIRC	MCAM-AP-1	19135	-1.25677	-2.07874	-0.434802	0.00272886
KIRC	TRAPPC10-AT-25	60801	-4.86639	-8.05008	-1.68271	0.00273648
KIRC	GCA-ES-7:8:9:10.1	55772	-28.3629	-46.924	-9.8018	0.00274457
KIRC	FAM104B-AT-5	89277	-3.46508	-5.73303	-1.19713	0.00274872
KIRC	RTFDC1-AT-11	59880	-39.9303	-66.0758	-13.7847	0.00275966
KIRC	SLIT3-AT-37	74469	-27.7828	-46.0088	-9.55675	0.00281118
KIRC	JMJD8-ES-8	32952	-13.9442	-23.1006	-4.78788	0.0028373
KIRC	PDCD5-RI-5.2	48880	4.58893	1.57545	7.60242	0.00283922
KIRC	SNRPB-AT-8.2	58540	-8.69904	-14.4132	-2.9849	0.002847
KIRC	MS4A6A-RI-9.2	16057	-3.07765	-5.09992	-1.05538	0.00285595
KIRC	MSR1-AT-10.2	82778	2.77175	0.950468	4.59303	0.0028562
KIRC	BLOC1S6-AT-4.2	30431	2.07796	0.712137	3.44379	0.00286482
KIRC	ENTPD4-AT-13	83079	-13.5524	-22.4639	-4.64093	0.00287612
KIRC	TWSG1-AT-7	44600	-1.72974	-2.86739	-0.592091	0.00288223
KIRC	UBE2V2-AP-1.1	83797	-1.5305	-2.53799	-0.523014	0.00290671
KIRC	ACTR10-ES-0.0854166666666667	27683	10.3232	3.52412	17.1222	0.00292162
KIRC	RER1-ES-4	261	-47.8535	-79.3746	-16.3324	0.00292511
KIRC	C11orf31-AT-4	15924	-7.70342	-12.7809	-2.6259	0.00294346
KIRC	MRPS28-ES-4.1:4.2	84266	-7.44741	-12.3591	-2.53568	0.00296063
KIRC	RPL17-AP-1	45479	-4.56773	-7.58051	-1.55496	0.00296306
KIRC	KIAA1456-AT-8	82760	3.50402	1.19208	5.81596	0.00297263
KIRC	GUK1-AA-7.1	10188	-18.3042	-30.3899	-6.21841	0.00299341
KIRC	ETFA-ES-12	31930	4.80931	1.63321	7.98541	0.00299925
KIRC	ZNF587B-AT-5	52348	1.85241	0.628937	3.07588	0.00300232
KIRC	CMC4-AP-1	90669	-1.58157	-2.62629	-0.536853	0.00300584
KIRC	RANBP10-AT-17	37100	-3.18331	-5.28759	-1.07903	0.0030269
KIRC	STARD10-AD-3.3	17645	-15.3389	-25.4789	-5.19894	0.0030281
KIRC	UXS1-AT-16	54853	-19.5107	-32.4089	-6.61247	0.00302907
KIRC	ZFP28-AT-8	52182	-3.02012	-5.01726	-1.02298	0.0030377
KIRC	VCAM1-ES-0.2125	3886	-324.496	-539.124	-109.868	0.00304395
KIRC	RPL27A-AT-4	14253	-11.6406	-19.3438	-3.93743	0.0030586
KIRC	CRKL-RI-3.2	61192	-30.0466	-49.9317	-10.1616	0.00306108
KIRC	UBE2A-AP-1	89956	-1.78622	-2.96837	-0.604071	0.00306151
KIRC	MYL6-AT-5	22376	-6.45176	-10.7233	-2.1802	0.00307312
KIRC	ECT2-ES-2	67659	3.25213	1.09857	5.40569	0.00307865
KIRC	TNKS-AT-28	82596	-1.904	-3.16542	-0.642578	0.00309255
KIRC	VDAC3-ES-8.2:9:10:11.1	83721	15.904	5.36178	26.4462	0.00310847
KIRC	ADAMTSL1-AT-30	85946	-1.82502	-3.03512	-0.614923	0.0031172
KIRC	RMDN1-AA-14.1	84373	-2.56383	-4.26613	-0.86152	0.00315843
KIRC	KREMEN1-AT-9.2	61568	-3.37268	-5.61235	-1.133	0.00316267
KIRC	HEATR5A-AT-37	27113	-2.7818	-4.62933	-0.934271	0.00316654
KIRC	CCT5-ES-0.127835648148148	71557	-214.489	-356.981	-71.9973	0.00317486
KIRC	DHDDS-AT-10.2	1273	-2.08081	-3.46352	-0.698104	0.00318274
KIRC	ZBTB8OS-AT-7	1611	3.80967	1.27546	6.34388	0.00321489
KIRC	PPAPDC1B-AT-7	83388	-2.35261	-3.91794	-0.787277	0.00322205
KIRC	DTD2-RI-3.2	27119	-3.77561	-6.28792	-1.2633	0.00322415
KIRC	COMMD4-ES-0.297222222222222	31847	101.59	33.9497	169.231	0.0032432
KIRC	MRFAP1-RI-1.2:1.3	68723	-5.12203	-8.53329	-1.71077	0.00325152
KIRC	GNAI2-ES-6	64971	-165.762	-276.178	-55.3455	0.00325693
KIRC	DNAJB2-RI-9.2	57675	1.93998	0.647118	3.23284	0.00327166
KIRC	ZEB2-AT-12	55516	-3.76733	-6.27862	-1.25603	0.00327949
KIRC	ABHD17B-AT-4.2	86574	-12.1172	-20.198	-4.03641	0.00329294
KIRC	USF2-ES-0.127836805555556	49096	-71.0831	-118.529	-23.6369	0.00332063
KIRC	DHRS12-AT-10.3	25950	-6.03636	-10.067	-2.00575	0.00333225
KIRC	RPL29-AD-1.2:1.3:1.4	65177	617.258	204.92	1029.6	0.00334616
KIRC	ATXN3-AT-14	28898	-5.98913	-9.99482	-1.98344	0.00338467
KIRC	CLK4-AT-15	74869	4.64964	1.53865	7.76062	0.00339687
KIRC	SKA2-ES-3	42731	1.38274	0.457108	2.30837	0.00341306
KIRC	SLC35D1-AT-13	3347	-1.78797	-2.98547	-0.59047	0.00342917
KIRC	ST8SIA4-AT-6	72883	-12.2985	-20.5357	-4.06135	0.00342994
KIRC	MED22-RI-5.2	88029	-16.3972	-27.38	-5.41435	0.00343139
KIRC	TBC1D8B-AT-7.2	89806	2.23388	0.736969	3.7308	0.00344563
KIRC	FARP1-AT-30	26165	10.6104	3.50026	17.7206	0.00344639
KIRC	CLIP1-AT-26	24948	-26.7436	-44.6656	-8.82155	0.00344795
KIRC	GTF3C5-AT-12	88004	-4.13834	-6.91205	-1.36464	0.0034529
KIRC	CRYZL1-AT-17	60452	-1.92007	-3.20699	-0.633148	0.00345297
KIRC	RPS25-AD-2.2	19056	117.357	38.5659	196.148	0.00350808
KIRC	PPA2-AT-15	70196	5.49677	1.80463	9.1889	0.00352344
KIRC	SPAG1-AT-20	84700	4.15852	1.36485	6.9522	0.0035285
KIRC	TMEM9-AD-5.2	9352	-39.2894	-65.7068	-12.872	0.00355727
KIRC	IFT20-AT-7.2	39878	-2.81161	-4.70254	-0.920685	0.0035653
KIRC	PNRC1-AD-1.2	76987	-5.27535	-8.82847	-1.72223	0.0036146
KIRC	SMIM12-AT-4.2	1700	-4.07283	-6.81679	-1.32888	0.00362396
KIRC	HUS1-AT-9.4	79614	-36.3958	-60.9236	-11.868	0.00363388
KIRC	ELP4-ES-0.424305555555556	14825	1.38999	0.45278	2.3272	0.00365086
KIRC	ERN1-AT-22	43053	-2.62617	-4.39985	-0.852494	0.00370795
KIRC	SUOX-ES-0.0854166666666667	22343	2.60895	0.844052	4.37385	0.00376383
KIRC	NMT1-AT-13	41935	-34.4558	-57.7889	-11.1226	0.00380059
KIRC	UBXN1-RI-8.2	16396	5.58768	1.80269	9.37268	0.00381044
KIRC	VPS33A-AT-15	24940	-3.40251	-5.70913	-1.09589	0.00383828
KIRC	CEP41-AT-13	81797	-1.61464	-2.71003	-0.519253	0.00386403
KIRC	CREB1-AT-13	57176	-3.07662	-5.16386	-0.989383	0.00386449
KIRC	SPTLC1-AT-16	86830	-1.63497	-2.74439	-0.525558	0.00387147
KIRC	CCND3-AP-2	76156	-1.25764	-2.11122	-0.404053	0.0038803
KIRC	TMEM67-AT-30.2	84535	-2.8345	-4.75961	-0.909386	0.00390402
KIRC	PKIG-AT-7	59476	-23.7716	-39.9173	-7.62596	0.00390546
KIRC	PER1-ES-20	39095	-9.54225	-16.0266	-3.05794	0.0039233
KIRC	GLYR1-RI-17.2	33862	-5.31368	-8.92886	-1.69851	0.00396658
KIRC	POLR2F-AT-5	62180	-1.45893	-2.45158	-0.466275	0.00396903
KIRC	PBLD-AT-10	11926	-8.75963	-14.724	-2.79524	0.00399559
KIRC	APRT-AA-5.1	38027	8.22928	2.62277	13.8358	0.00401666
KIRC	PDDC1-ES-7:8.1:8.2:8.3:8.4	13747	-4.12011	-6.92941	-1.31082	0.00404688
KIRC	CDK17-AT-17	23828	2.47857	0.788363	4.16877	0.00405114
KIRC	ZNF124-AT-6	10516	2.00486	0.637122	3.3726	0.00406652
KIRC	NUPL2-AT-9	78961	4.15549	1.31971	6.99127	0.00407771
KIRC	TTC26-AT-18	81942	-9.94132	-16.7267	-3.1559	0.00408469
KIRC	CD74-AT-10.2	74075	-102.596	-172.629	-32.5624	0.00408835
KIRC	TMEM208-AD-4.2	36986	8.24083	2.61145	13.8702	0.00411528
KIRC	GNAO1-AT-8	36461	-1.41786	-2.38644	-0.449288	0.00411615
KIRC	UBE2E1-AT-7	63716	-10.4348	-17.5638	-3.30588	0.0041197
KIRC	ZNF843-AT-3	36252	3.10923	0.984518	5.23395	0.0041289
KIRC	EEF1D-AP-1	85436	-3.12412	-5.26212	-0.986118	0.00418373
KIRC	STX7-AT-11	77642	-5.085	-8.56675	-1.60324	0.00420357
KIRC	NUDT5-AT-11	10768	-2.31702	-3.90494	-0.729098	0.00423793
KIRC	CAMK2G-AT-24	12238	-7.36135	-12.4086	-2.31406	0.00425569
KIRC	AKR1A1-ES-2	2698	-3.44738	-5.8114	-1.08336	0.00426107
KIRC	FILIP1-AT-7	76788	-1.88268	-3.17379	-0.59158	0.00426302
KIRC	CXCL12-AT-5.2	11342	-1.92671	-3.2491	-0.604332	0.00429457
KIRC	SLC7A7-AP-2.1	26619	1.72933	0.542206	2.91646	0.0043016
KIRC	NDUFA6-AP-1	62495	-5.57411	-9.40215	-1.74608	0.00431777
KIRC	YAE1D1-AT-3.2	79301	19.4318	6.07255	32.7911	0.00435984
KIRC	BNIP3-AT-6	13477	-3.67759	-6.20681	-1.14838	0.00437356
KIRC	ANKS1B-AT-32.3	23885	-2.23764	-3.77678	-0.69851	0.00437933
KIRC	NOMO2-RI-32.2	34243	-26.8881	-45.3853	-8.39091	0.00438478
KIRC	SNAPC5-AT-3.3	31269	2.82401	0.880134	4.76789	0.00440804
KIRC	SLC33A1-RI-6.2	67353	-4.63288	-7.82723	-1.43853	0.0044746
KIRC	AUH-AT-11	86823	-1.67291	-2.82715	-0.518677	0.00450132
KIRC	CC2D1B-AT-25.3	3002	-4.76924	-8.06092	-1.47756	0.00451495
KIRC	FAM221A-ES-2:3.1:3.2:3.3	78994	2.38179	0.736781	4.02679	0.00454238
KIRC	RIOK2-AT-10	72878	-1.72281	-2.91278	-0.53283	0.00454588
KIRC	TIMP1-AT-4	88926	-31.9755	-54.0674	-9.88358	0.00455651
KIRC	HAX1-AA-2.1	7826	-16.3056	-27.5766	-5.03452	0.00457633
KIRC	SLC4A4-AT-26	69464	-2.91577	-4.93174	-0.899795	0.00458599
KIRC	TRUB2-AP-1	87733	-1.5428	-2.61016	-0.475428	0.00461173
KIRC	YWHAE-ES-0.170208333333333	38292	-264.571	-447.641	-81.5004	0.00461837
KIRC	CIRBP-RI-9.2	46433	21.0326	6.45061	35.6145	0.00469875
KIRC	ARV1-AT-7	10262	-4.97744	-8.42926	-1.52561	0.00471019
KIRC	U2AF1L4-ES-0.00566087962962963	49268	-3.85134	-6.52316	-1.17952	0.0047248
KIRC	TNFSF10-ES-0.127777777777778	67647	-19.3224	-32.7323	-5.91254	0.00474093
KIRC	SPATA20-ES-10	42425	-12.6477	-21.4306	-3.86482	0.00476618
KIRC	FAU-RI-2.3	16775	52.7156	16.0989	89.3322	0.00477722
KIRC	TMEM97-AT-5	39875	-38.886	-65.9054	-11.8667	0.00479096
KIRC	CIRH1A-AT-16	37274	-6.3246	-10.7217	-1.92755	0.00481491
KIRC	OST4-RI-1.2	52928	33.4039	10.1747	56.6332	0.00482565
KIRC	ACOT2-AP-2.1	28300	-3.37302	-5.72096	-1.02508	0.00486773
KIRC	UXT-ES-3	88940	-58.2429	-98.7988	-17.687	0.0048818
KIRC	TTC39C-AT-18	44854	-2.04604	-3.47076	-0.621322	0.00488217
KIRC	MED17-AT-12.2	18328	-1.66309	-2.82244	-0.503727	0.00493045
KIRC	AUP1-AA-11.1	54101	4.99313	1.51173	8.47454	0.00493814
KIRC	CYB5RL-AT-10	3129	-1.11151	-1.88663	-0.336378	0.00494615
KIRC	SORD-AT-11	30378	-5.36636	-9.1116	-1.62113	0.0049798
KIRC	RAN-RI-1.2	25207	27.4372	8.27047	46.6038	0.00502084
KIRC	LMBR1-AT-21	82466	-1.82986	-3.10837	-0.551354	0.00502863
KIRC	ARSB-AT-10	72614	-4.21391	-7.15952	-1.2683	0.00504934
KIRC	NDUFB4-AD-1.2	66378	23.5094	7.06238	39.9564	0.00508538
KIRC	CFL1-ES-3	16925	-89.0462	-151.352	-26.7407	0.00509203
KIRC	USP6NL-AT-18	10751	-2.47341	-4.20416	-0.742662	0.00509474
KIRC	DOK4-AT-8.3	36568	-32.4513	-55.1766	-9.72603	0.00512937
KIRC	NOTCH2-AT-37	4401	7.03277	2.10771	11.9578	0.00513019
KIRC	FAM47E-STBD1-AP-5	69611	2.79208	0.834153	4.75001	0.00519022
KIRC	TANK-ES-12	55739	-25.9897	-44.2393	-7.73998	0.00525103
KIRC	ATP5G1-AT-5	42237	-18.272	-31.1142	-5.42968	0.00529313
KIRC	SHFM1-AT-3	80551	24.7765	7.34833	42.2047	0.00533048
KIRC	MAGT1-AT-11	89535	-2.38079	-4.05625	-0.705342	0.00535142
KIRC	EZR-AP-1	78289	2.68334	0.794699	4.57197	0.00535812
KIRC	PTCD2-AT-10.2	72456	1.97802	0.585711	3.37033	0.00536146
KIRC	CBWD1-RI-4.2	85692	1.37859	0.408139	2.34904	0.00536503
KIRC	NOL12-RI-6.2	62148	1.2799	0.378261	2.18154	0.00539885
KIRC	RHOC-ES-6.2:7.1	4231	-67.879	-115.701	-20.0567	0.0054029
KIRC	MRPL39-ES-10	60252	7.60299	2.24245	12.9635	0.00543812
KIRC	CHCHD3-AT-3	81834	-1.45266	-2.47808	-0.427239	0.00549346
KIRC	DLD-AT-15.2	81376	-4.14884	-7.07774	-1.21993	0.00549781
KIRC	ZNF793-RI-10.2:10.3	49537	1.58508	0.46585	2.7043	0.00550746
KIRC	PAIP1-ES-11	71960	-102.577	-175.018	-30.1361	0.0055146
KIRC	EDA-AT-10	89361	-1.50721	-2.57183	-0.442588	0.0055241
KIRC	COA4-ES-2.2	17737	5.49626	1.61219	9.38034	0.00554568
KIRC	RANGAP1-AP-1	62415	-1.57603	-2.69022	-0.461849	0.00556438
KIRC	ZNF3-AT-7	80877	-3.7841	-6.45967	-1.10853	0.00557113
KIRC	FOSB-AT-3.3	50450	-2.14173	-3.65611	-0.627349	0.00557299
KIRC	FOS-RI-2.3	28499	1.68887	0.493772	2.88397	0.00560994
KIRC	PCYT1A-AT-11.2	68230	3.13778	0.916905	5.35865	0.00562025
KIRC	TPM1-AT-15	30985	-3.88264	-6.63238	-1.1329	0.00564926
KIRC	ARHGEF10L-AT-32	861	-6.03983	-10.3189	-1.7608	0.00566648
KIRC	CAMKK2-AT-19.2	24851	-8.26988	-14.1343	-2.40545	0.00571163
KIRC	CHCHD5-RI-2.4	55023	1.86408	0.538211	3.18996	0.00585899
KIRC	SETMAR-AT-3	62992	-6.51	-11.1407	-1.87933	0.00586195
KIRC	KIAA2013-AT-3	694	8.91794	2.57418	15.2617	0.00586416
KIRC	ATP5G2-AD-1.3	22104	-25.1137	-42.9979	-7.22954	0.00591847
KIRC	CHPF2-RI-1.2	82358	-68.398	-117.153	-19.6431	0.00596634
KIRC	CX3CL1-AP-1	36540	-1.31893	-2.26072	-0.377153	0.00605356
KIRC	ANK3-AT-50	11846	-3.4438	-5.90304	-0.984562	0.00605773
KIRC	SLC16A5-AT-9	43352	1.72795	0.49377	2.96213	0.00606762
KIRC	C11orf88-RI-6.2	18667	-1.27932	-2.19388	-0.364763	0.00611266
KIRC	ABCC9-AT-43	20715	-12.4232	-21.3084	-3.53796	0.00613663
KIRC	EIF3G-ES-5	47465	1.38932	0.395248	2.38339	0.00615785
KIRC	TMEM219-AP-3.1	35991	1.718	0.488596	2.94741	0.00616446
KIRC	EMC9-AA-3.2	26857	1.46239	0.415818	2.50896	0.00616855
KIRC	CALCOCO2-ES-0.0854166666666667	42234	8.74824	2.48656	15.0099	0.00617613
KIRC	FAM98B-AT-8	29919	-1.63889	-2.81202	-0.46577	0.00617886
KIRC	MYL6-AD-4.2:4.3	22377	3.36386	0.954621	5.77309	0.00620837
KIRC	NOSIP-AA-6.1	50975	4.48149	1.26963	7.69335	0.00624317
KIRC	GABARAPL1-AT-5	20353	-6.77964	-11.6424	-1.91689	0.00628403
KIRC	H2AFV-ES-3	79574	-20.37	-34.9878	-5.75216	0.00631008
KIRC	IKBIP-AT-3	23864	-2.60235	-4.47177	-0.732928	0.00636441
KIRC	LRRC1-AT-16	76508	-2.1045	-3.61711	-0.591901	0.0063928
KIRC	CD96-AT-15.2	66051	-2.4531	-4.21692	-0.68928	0.00641274
KIRC	DYNLT3-AT-6.2	88789	-1.78091	-3.06186	-0.499959	0.00643125
KIRC	RPSA-AD-1.2	64185	90.6505	25.4447	155.856	0.00643438
KIRC	SEC24D-ES-27	70445	1.26951	0.356155	2.18287	0.00644507
KIRC	LDHA-ES-3	14636	1.32439	0.371488	2.27728	0.00644853
KIRC	PSMD4-AD-7.2	7584	12.2504	3.43439	21.0665	0.00645962
KIRC	KCTD13-AT-2.2	35987	-1.92752	-3.31539	-0.53965	0.00648761
KIRC	COQ6-AT-14.2	28341	3.07609	0.860779	5.29139	0.00649811
KIRC	SPP1-ES-4	69875	14.4021	4.0271	24.777	0.00651369
KIRC	FMN1-AT-23	29832	-2.47854	-4.26449	-0.692594	0.00652738
KIRC	TCTEX1D2-ES-4	68236	1.33298	0.372409	2.29355	0.00653148
KIRC	RPL37A-AP-1	57413	-41.2831	-71.0393	-11.5268	0.00654397
KIRC	NUDT22-AT-5	16584	-11.3696	-19.5651	-3.17411	0.00654679
KIRC	GLS-AP-1	56586	0.840726	0.234339	1.44711	0.00657979
KIRC	ZFYVE20-AT-15	63550	-4.12095	-7.09334	-1.14855	0.00658163
KIRC	KRT8-AP-3.1	21907	-1.20146	-2.06846	-0.334464	0.00660636
KIRC	C15orf40-AT-4	32245	2.4647	0.684577	4.24481	0.00665357
KIRC	ZNF721-AT-4.2	68349	-2.91306	-5.01758	-0.808532	0.00666856
KIRC	SYPL1-ES-6	81328	1.53248	0.425246	2.63971	0.00667351
KIRC	C17orf49-AA-6.1	38820	-4.71785	-8.127	-1.3087	0.00668079
KIRC	TRIM11-AT-6	10208	-5.12071	-8.8225	-1.41893	0.0067033
KIRC	TCF25-ES-18	38159	2.83558	0.784675	4.88648	0.00673144
KIRC	DFNB31-AT-13	87326	-2.81439	-4.85001	-0.778773	0.00673249
KIRC	THYN1-ES-6	19546	-5.53023	-9.53083	-1.52963	0.00674134
KIRC	ZNF280D-AT-30	30771	4.1563	1.14814	7.16445	0.00676834
KIRC	ZNF347-AT-5	51693	-5.49939	-9.47987	-1.51891	0.00677172
KIRC	HEXA-AT-15	31540	-2.8793	-4.96588	-0.79272	0.00683905
KIRC	ZNF83-AT-10.4	51483	2.33465	0.642752	4.02655	0.00683959
KIRC	DDX19B-AT-15	37347	-1.94346	-3.35198	-0.534953	0.00684364
KIRC	ZNF571-AT-6	49547	5.32079	1.46293	9.17864	0.00686756
KIRC	OAZ3-AP-3	7652	1.18682	0.326031	2.0476	0.0068858
KIRC	BEST1-RI-11.2	16315	-1.75924	-3.03644	-0.48203	0.00694075
KIRC	HNRNPK-AA-18.1	86713	-6.1409	-10.6016	-1.68018	0.00697149
KIRC	BRF1-AD-1.2	29625	2.73867	0.749087	4.72826	0.00697787
KIRC	GUSB-ES-3.1:3.2:4.1	79861	-9.20196	-15.8921	-2.51181	0.00702139
KIRC	AGAP1-AT-20	58087	-5.5755	-9.63229	-1.5187	0.00706641
KIRC	CARF-AT-19	56967	5.10856	1.3881	8.82902	0.00711902
KIRC	TMEM205-RI-2.3:2.4:2.5	47666	1.4742	0.400518	2.54787	0.00712178
KIRC	SNX24-AT-8	73126	-2.29589	-3.97045	-0.621328	0.00720564
KIRC	PARP11-AT-10	19762	-9.83016	-17.0046	-2.65578	0.0072423
KIRC	MXRA7-AP-1	43608	-1.27049	-2.1988	-0.342189	0.00730871
KIRC	RPTOR-AT-34	44082	-5.54065	-9.59016	-1.49114	0.00732537
KIRC	DAD1-AD-1.2:1.3	26611	-180.485	-312.522	-48.4489	0.00738105
KIRC	ZNF69-AT-5	47758	2.38528	0.640057	4.13051	0.0073892
KIRC	TMX3-AT-19	45755	5.32885	1.42941	9.2283	0.0073969
KIRC	MED19-AA-4.1	15889	2.00602	0.537955	3.47408	0.00740254
KIRC	S100A16-AD-2.2	7726	-3.32751	-5.76294	-0.892093	0.00740859
KIRC	CHID1-ES-6.1:6.2:6.3	13814	1.32451	0.354533	2.29449	0.00744302
KIRC	EDF1-AA-4.3	88231	-11.247	-19.4877	-3.0064	0.00747273
KIRC	SLC11A2-AT-22.2	21730	-1.45053	-2.51343	-0.387628	0.00747869
KIRC	PSMA2-ES-0.0854166666666667	79322	-53.1895	-92.1854	-14.1937	0.00750973
KIRC	ANTXR2-AT-19.3	69666	-4.0622	-7.04075	-1.08365	0.00751679
KIRC	RARRES3-AT-5	16514	-43.4427	-75.3033	-11.5822	0.00752954
KIRC	RPLP0-AP-1.1	24722	-4.77248	-8.2763	-1.26867	0.00759344
KIRC	TIPRL-AT-8	8901	-1.46931	-2.54806	-0.390558	0.007595
KIRC	MFF-ES-0.381944444444444	57807	-1.76739	-3.06521	-0.469576	0.00760508
KIRC	CSNK1D-ES-11	44308	-5.5438	-9.61613	-1.47147	0.00762667
KIRC	FAM3A-AT-10	90622	-4.56183	-7.91632	-1.20733	0.00769012
KIRC	SYT15-RI-8.3	11436	4.97869	1.31749	8.63988	0.00769278
KIRC	C11orf73-RI-5.2	18185	1.95012	0.516043	3.38419	0.00769321
KIRC	MRPL43-RI-3.3	12854	-6.40953	-11.1338	-1.68523	0.00783468
KIRC	POLD2-AA-11.1	79475	23.3138	6.1254	40.5022	0.00785049
KIRC	LYNX1-AT-6.2	85365	-2.10132	-3.65168	-0.550956	0.00789607
KIRC	TUFM-ES-3	35864	-33.1504	-57.6137	-8.68709	0.00790829
KIRC	MRPL53-ES-2	54074	60.1793	15.6859	104.673	0.00802681
KIRC	DENND1A-AT-25	87514	-2.10461	-3.66212	-0.547094	0.00808681
KIRC	ZNRF1-AT-6.2	37576	-2.62364	-4.56594	-0.681349	0.00810865
KIRC	AHI1-AT-36	77886	2.67497	0.694198	4.65574	0.00812408
KIRC	MED18-RI-3.2	1383	-19.1407	-33.3232	-4.95827	0.00816481
KIRC	FADS2-AT-17	16295	-7.74249	-13.4794	-2.00556	0.00816561
KIRC	GATM-AT-10	30420	-6.35051	-11.0564	-1.64463	0.00817052
KIRC	PRKACA-ES-4:5:6:7:8:9:10:11.1	47959	-19.9274	-34.7048	-5.15007	0.00821672
KIRC	MCFD2-ES-0.2125	53475	5.87567	1.51536	10.236	0.00826318
KIRC	VASH1-AT-7	28556	-3.27654	-5.70827	-0.844807	0.00826924
KIRC	RPL13A-AD-2.2	50950	19.401	5.00043	33.8015	0.00827741
KIRC	APOBEC3D-AP-2	62272	4.095	1.05352	7.13648	0.00831843
KIRC	PLCE1-AT-34	12578	-2.86975	-5.00501	-0.734497	0.00843447
KIRC	DAZAP2-ES-4.1:4.2:4.3:4.4:4.5:4.6	21817	-96.3777	-168.163	-24.5926	0.00850282
KIRC	SYNJ2-AT-29	78246	-4.40446	-7.6882	-1.12071	0.0085666
KIRC	MBD4-AT-8	66717	-1.82135	-3.17993	-0.462784	0.00859879
KIRC	IQCK-AT-9	34334	-1.86619	-3.25853	-0.473852	0.00861427
KIRC	TRMT2B-AT-15	89623	4.35284	1.10394	7.60173	0.00864098
KIRC	SUPT16H-AT-28	26572	-13.2213	-23.0929	-3.3497	0.00866411
KIRC	MAN1C1-AP-1	1193	-1.22418	-2.139	-0.309365	0.00872192
KIRC	PRKAR1A-AT-12	43146	-8.84483	-15.4559	-2.23379	0.00873613
KIRC	FOS-AP-1	28490	-1.76345	-3.08216	-0.444736	0.00876823
KIRC	POLA2-AT-18	16808	-2.73084	-4.77316	-0.688509	0.00877476
KIRC	PPM1B-AT-7	53414	2.12832	0.535454	3.72119	0.00882342
KIRC	BIN3-AT-11	83043	-2.10213	-3.67579	-0.528482	0.00883996
KIRC	DGKE-AT-12	42596	-2.27619	-3.98145	-0.570929	0.00889227
KIRC	MYOM3-AT-39	1086	-15.2745	-26.7337	-3.81543	0.00898684
KIRC	TAGLN-AP-1.1	18894	-7.03062	-12.3051	-1.75613	0.00898746
KIRC	STK3-AT-17	84654	-5.63059	-9.85571	-1.40547	0.009003
KIRC	PRICKLE4-AA-10.1	76139	-3.09883	-5.42461	-0.773055	0.00901652
KIRC	CCDC34-AT-6	14751	4.90647	1.22073	8.59221	0.0090777
KIRC	ZNF93-AT-7	48695	-1.69869	-2.97563	-0.421753	0.00912569
KIRC	RPAIN-ES-0.170138888888889	38686	-19.6167	-34.3706	-4.86274	0.00916205
KIRC	BUB3-AA-8.1	13390	2.16844	0.537516	3.79936	0.00916269
KIRC	ATPAF2-AT-8	39532	2.81797	0.697733	4.9382	0.00918862
KIRC	ACTR2-AT-11	53796	-43.0801	-75.4974	-10.6629	0.00919694
KIRC	WDR41-ES-0.127777777777778	72584	7.53113	1.86392	13.1983	0.00919845
KIRC	ABI3BP-AT-68	65841	-14.6846	-25.7359	-3.63337	0.00920489
KIRC	ANKLE2-AT-13	25298	-7.91928	-13.8815	-1.95707	0.00923277
KIRC	PRKAG1-ES-3	21509	12.9953	3.21073	22.7798	0.0092381
KIRC	WNK1-AT-31	19613	-7.36639	-12.9147	-1.8181	0.00926224
KIRC	PUS1-ES-0.127777777777778	25226	-16.2774	-28.5407	-4.01409	0.00928146
KIRC	SYNGR1-AT-8	62299	-1.97502	-3.46313	-0.486913	0.00928791
KIRC	ZNF585B-AT-8.3	49459	-8.02791	-14.0797	-1.97613	0.00932328
KIRC	MDH2-AT-10	80158	-6.14202	-10.7736	-1.51048	0.0093451
KIRC	ADARB1-RI-13.2:13.3	60863	2.02829	0.497069	3.55951	0.00942578
KIRC	FICD-AT-3.2	24211	-11.1425	-19.5576	-2.72742	0.00945329
KIRC	PDDC1-RI-8.4	13743	-9.96588	-17.4967	-2.43505	0.00949479
KIRC	TMEM101-AT-5	41753	-13.9596	-24.5099	-3.40932	0.00950525
KIRC	CLEC7A-AT-9.3	20312	1.41402	0.345206	2.48283	0.00951441
KIRC	DEF8-AT-14	38182	-1.54455	-2.71206	-0.377045	0.00951616
KIRC	HARS2-AT-12	73741	-4.76037	-8.36012	-1.16063	0.00954487
KIRC	ZBTB44-RI-7.4	19492	-3.19567	-5.61352	-0.777832	0.00958381
KIRC	NREP-AT-11	72975	25.5676	6.21707	44.9181	0.00960666
KIRC	TSSC1-AT-12	52547	45.4236	11.0373	79.8098	0.0096234
KIRC	DYNLL1-AP-4.1	24758	-22.0407	-38.7287	-5.3526	0.00963639
KIRC	RASA4-ES-17	81122	2.15276	0.521155	3.78437	0.00970971
KIRC	HIGD1A-AA-5.1	64317	26.5699	6.42993	46.7099	0.00971797
KIRC	ASCC1-ES-0.59375	12080	1.24575	0.301162	2.19034	0.00974193
KIRC	TRIM41-RI-6.4	75050	-2.482	-4.36482	-0.599176	0.00977498
KIRC	CARD8-AT-14	50708	-1.94928	-3.42802	-0.470545	0.00977641
KIRC	LAMTOR1-AT-4.3	17556	-8.20523	-14.4301	-1.98032	0.0097808
KIRC	TTC23-AT-15	32610	-4.60194	-8.09755	-1.10633	0.00987223
KIRC	PHF14-AT-19	78800	2.22547	0.534652	3.91629	0.00988799
KIRC	CD59-AT-8.3	14907	-35.6829	-62.7943	-8.57159	0.00989061
KIRC	TMUB2-AT-5	41786	-1.55734	-2.74062	-0.374057	0.00989309
KIRC	FUBP1-AT-21.2	3543	-3.3251	-5.85195	-0.798238	0.00990526
KIRC	STAT5A-AT-21	41031	-7.65883	-13.4791	-1.83861	0.00990537
KIRC	B4GALNT1-AT-12	22675	-1.49608	-2.63335	-0.358814	0.00992757
KIRC	PRMT2-AT-12	60951	-2.68116	-4.71972	-0.642612	0.00994308
KIRC	TP53I11-AT-12	15484	-6.41955	-11.3029	-1.53617	0.00998026
KIRC	CMC2-AP-2	37702	-1.77844	-3.13144	-0.425439	0.00998764
KIRC	SEC22C-AT-12	64290	3.32265	0.791198	5.85409	0.0100954
KIRC	GPR137-AP-3.1	16617	-2.09951	-3.69931	-0.49972	0.0101058
KIRC	PSMD7-AT-8.2	37560	-7.85551	-13.8435	-1.86749	0.0101341
KIRC	NEK11-AT-21	66783	-3.70704	-6.53385	-0.880223	0.0101621
KIRC	UBE2V1-AP-2	59756	16.5635	3.92962	29.1974	0.0101819
KIRC	ELMOD3-RI-2.4:2.5:2.6:2.7:2.8	54226	1.07315	0.254586	1.89171	0.0101832
KIRC	TMEM138-RI-3.3	16188	1.51882	0.360306	2.67734	0.0101838
KIRC	RBM39-AA-19.1	59238	3.60797	0.855348	6.3606	0.0101992
KIRC	TRAPPC4-AT-5	19059	2.53412	0.600498	4.46775	0.0102098
KIRC	ANXA4-ME-3|4	53860	-26.0926	-46.0244	-6.16075	0.0102947
KIRC	ZNHIT3-AT-5	40469	-2.22675	-3.92783	-0.525669	0.0102988
KIRC	NRP1-ES-14.1:14.2	11201	-8.58017	-15.1408	-2.01957	0.0103681
KIRC	GSK3A-RI-11.2	50139	-17.6445	-31.1461	-4.14293	0.0104259
KIRC	EIF6-ES-3	59075	-14.8868	-26.2801	-3.49341	0.0104394
KIRC	NBR1-ES-0.890277777777778	41695	-37.5763	-66.3464	-8.80624	0.0104705
KIRC	NBR1-AT-24	41694	-11.2522	-19.8809	-2.62344	0.0105924
KIRC	FAM120AOS-AP-2	86913	3.75165	0.870258	6.63304	0.0107129
KIRC	CDCP1-AT-9	64397	-2.70729	-4.78832	-0.626258	0.0107788
KIRC	LPCAT1-AT-14.2	71489	46.2528	10.6871	81.8184	0.0108059
KIRC	IGF1-AT-6	24051	-1.28343	-2.2705	-0.296364	0.0108206
KIRC	PCBD2-AT-5	73439	3.45933	0.79782	6.12084	0.0108502
KIRC	MME-AT-26	67340	-7.6661	-13.5645	-1.76767	0.0108549
KIRC	FNIP1-AT-18	73236	-11.5132	-20.3721	-2.65421	0.0108596
KIRC	SP100-AT-19.2	57896	2.13684	0.491853	3.78182	0.0108966
KIRC	SSR2-ES-6.1:6.2	8148	17.024	3.91329	30.1347	0.0109286
KIRC	ARHGEF39-AP-1	86268	-1.58204	-2.80067	-0.363408	0.0109452
KIRC	PLXNC1-AT-32	23722	-2.0236	-3.58338	-0.463826	0.0109971
KIRC	FCHSD1-AT-21	73816	-3.11522	-5.51704	-0.713391	0.0110185
KIRC	PDP2-AT-2.4	36882	-6.65125	-11.7803	-1.52217	0.0110339
KIRC	TSPAN11-AT-9	20954	-2.29636	-4.06738	-0.525342	0.0110424
KIRC	FBXO11-AT-25.3	53517	-3.4659	-6.14108	-0.790732	0.0111077
KIRC	SLC39A1-AP-3	7764	-1.8681	-3.31149	-0.424716	0.0111908
KIRC	ATP6V1F-ES-2	81725	41.544	9.44277	73.6453	0.0111967
KIRC	PTPMT1-ES-2	15769	-3.44259	-6.10515	-0.780033	0.0112717
KIRC	SEMA4D-AP-2	86804	2.57862	0.583927	4.57332	0.0112858
KIRC	GCHFR-AT-4	30032	-5.63542	-9.9965	-1.27434	0.0113194
KIRC	NR2C1-AT-15	23742	-2.50805	-4.45436	-0.56174	0.0115486
KIRC	APOBEC3F-AT-8	62275	-1.32739	-2.35754	-0.29725	0.0115529
KIRC	GHDC-AP-1	41017	-1.48204	-2.63236	-0.331716	0.0115647
KIRC	OCIAD1-ES-10	69232	-38.7292	-68.8442	-8.61422	0.0117155
KIRC	GEMIN6-ES-5.1:5.2	53289	-2.86547	-5.09373	-0.637211	0.0117204
KIRC	PER1-AT-24	39093	-4.52861	-8.05066	-1.00656	0.0117323
KIRC	RAMP2-ES-4.2	41123	-10.066	-17.9025	-2.22951	0.0118164
KIRC	GMFG-RI-7.2	49768	3.06888	0.679606	5.45815	0.0118205
KIRC	LDHA-ES-8.3:9:10.1	14617	-122.384	-217.772	-26.9957	0.011915
KIRC	AKT2-AT-15	49873	-5.10501	-9.08486	-1.12517	0.0119344
KIRC	TMEM179B-ES-4	16427	9.57141	2.10929	17.0335	0.0119377
KIRC	IVNS1ABP-AT-17	9216	-11.993	-21.346	-2.64007	0.011964
KIRC	MICAL2-AT-28.2	14416	-2.15642	-3.83817	-0.474666	0.0119657
KIRC	NMNAT3-AT-8	67034	-7.01783	-12.4937	-1.54194	0.0120096
KIRC	ZNF714-AT-6.3	48746	-1.89338	-3.37139	-0.41538	0.012046
KIRC	SNX1-AA-16.1	31091	-18.359	-32.7038	-4.01424	0.0121265
KIRC	APOBR-ES-3.2:4.1	35749	10.6905	2.33486	19.0461	0.0121538
KIRC	ERCC1-ES-0.339700231481481	50444	-31.7308	-56.5353	-6.92625	0.0121674
KIRC	C4orf33-AT-7	70596	-1.86879	-3.33064	-0.406944	0.0122253
KIRC	CAST-AT-37.4	72850	-10.5872	-18.8764	-2.29795	0.0123038
KIRC	TRMT10B-AT-9.2	86424	3.801	0.824605	6.77739	0.0123156
KIRC	C6orf62-AD-1.3	75532	-7.06342	-12.5953	-1.53155	0.0123285
KIRC	HES2-AT-4.3	400	-1.80526	-3.22002	-0.390496	0.0123862
KIRC	MMS22L-AT-26	77039	-6.30945	-11.2548	-1.36405	0.0123995
KIRC	PFDN5-ES-0.085474537037037	22003	-79.9079	-142.557	-17.259	0.0124225
KIRC	SPTLC3-AT-12	58700	-5.45752	-9.73671	-1.17833	0.012431
KIRC	DNAJC10-AT-26	56462	-1.59583	-2.84876	-0.342896	0.0125476
KIRC	ATP5J2-AD-1.2	80645	-3.41146	-6.09042	-0.732494	0.012565
KIRC	PDCD10-AT-12	67553	-20.6629	-36.901	-4.42469	0.0126302
KIRC	LAMTOR2-AA-4.1	8168	17.6456	3.77405	31.5172	0.0126592
KIRC	SLC25A3-AT-8	23852	-13.4062	-23.9744	-2.83805	0.0129077
KIRC	THEM4-ES-3	7677	2.06939	0.438006	3.70077	0.0129119
KIRC	NDUFB11-AD-2.2	88904	5.02954	1.06407	8.99501	0.0129229
KIRC	AP4M1-AT-16.2	80889	3.49469	0.738539	6.25084	0.0129495
KIRC	MED11-AT-3.2	38577	-1.56687	-2.80263	-0.331105	0.0129512
KIRC	ARL6IP5-ES-3	65577	1.26337	0.266398	2.26035	0.0130033
KIRC	SERP1-ES-3.1	67274	167.139	35.2336	299.045	0.01301
KIRC	SAT2-ES-4	39031	-1.88494	-3.37273	-0.397159	0.0130219
KIRC	C17orf49-ES-3	38825	-11.2882	-20.1985	-2.37792	0.0130272
KIRC	ABCD3-AT-25	3811	-1.88099	-3.36613	-0.395842	0.0130515
KIRC	GNB2L1-AD-2.2:2.3	75067	513.672	108.058	919.286	0.0130606
KIRC	CNOT7-AT-8	82785	4.24951	0.893453	7.60557	0.013074
KIRC	CLNK-AT-24	68789	-1.52858	-2.73634	-0.320826	0.0131159
KIRC	ABCF2-AT-15.2	82355	-2.63889	-4.72601	-0.551772	0.0132077
KIRC	CNOT1-AT-50	36670	-7.47883	-13.3982	-1.55944	0.0132749
KIRC	NFS1-ES-0.297222222222222	59217	5.74179	1.1969	10.2867	0.0132818
KIRC	RNF170-AT-7	83744	-18.0483	-32.3483	-3.74837	0.0133715
KIRC	GID4-AT-7	39539	-1.42148	-2.5488	-0.29415	0.0134596
KIRC	VIMP-AT-7.2	32757	-6.70865	-12.0325	-1.38478	0.0135201
KIRC	APBB1IP-AT-15	11031	-4.68024	-8.39842	-0.962053	0.0136216
KIRC	SORBS3-AT-21	83017	-46.3384	-83.1805	-9.49628	0.0136953
KIRC	OSGIN2-AT-7	84389	-7.12342	-12.7896	-1.4572	0.013739
KIRC	UBE2W-AT-9	84190	-12.6084	-22.6381	-2.57876	0.0137436
KIRC	PTPN2-AT-13	44716	3.71621	0.757219	6.6752	0.0138347
KIRC	CKLF-AT-4	36728	7.92277	1.61293	14.2326	0.013856
KIRC	MLST8-AT-11.3	33217	-17.3862	-31.2463	-3.52609	0.0139484
KIRC	ALG11-ES-0.0854166666666667	25978	-2.90924	-5.22991	-0.588564	0.0140085
KIRC	AHRR-AT-15	71434	-1.98694	-3.57209	-0.401795	0.0140194
KIRC	POMGNT1-RI-22.2	2784	-13.1932	-23.7187	-2.66766	0.0140215
KIRC	SLC16A3-AP-4.1	44301	0.90585	0.183022	1.62868	0.0140403
KIRC	ATG10-AT-11	72682	-1.79676	-3.23172	-0.361808	0.0141219
KIRC	USHBP1-AA-3.1:3.2	48249	4.41627	0.887103	7.94543	0.0141817
KIRC	POLR2E-AD-2.2	46384	13.736	2.75398	24.7181	0.0142276
KIRC	ECE2-AT-3	67860	-3.70159	-6.66127	-0.741912	0.0142351
KIRC	OLFM1-AT-11	88102	-1.60091	-2.88095	-0.320866	0.0142355
KIRC	MRPS23-AT-5	42621	-18.3172	-32.9768	-3.65764	0.0143259
KIRC	GIT2-ES-17.2:18.1:18.2	24376	10.6954	2.13257	19.2583	0.0143615
KIRC	MRPL33-ES-3	53046	-2.39004	-4.30383	-0.476245	0.0143772
KIRC	RBM19-AT-24.3	24645	-1.39997	-2.52171	-0.278228	0.0144411
KIRC	TRNT1-AT-10.2	62977	3.5717	0.709271	6.43413	0.0144605
KIRC	FUT11-AT-4	12228	-8.79439	-15.8438	-1.74502	0.0144797
KIRC	CD164-RI-7.2	77184	-186.02	-335.14	-36.8989	0.0144875
KIRC	WBSCR22-AT-14	80001	-2.53102	-4.56082	-0.50123	0.0145274
KIRC	RPS20-RI-1.2:1.3	83894	173.428	34.2989	312.557	0.0145599
KIRC	WHSC1-AT-26	68527	4.76786	0.939972	8.59575	0.0146365
KIRC	AGO3-AT-22	1741	-1.63605	-2.94969	-0.322402	0.014647
KIRC	RCAN1-AT-9	60495	-6.03378	-10.879	-1.18859	0.0146559
KIRC	CARD6-AT-3	71873	-3.46317	-6.2463	-0.680044	0.0147332
KIRC	NKTR-AT-19	64303	7.8916	1.5437	14.2395	0.0148263
KIRC	PPP1CC-AT-6.3	24501	-17.0199	-30.7203	-3.31961	0.0148973
KIRC	TMEM53-AT-3.3	2562	-2.41025	-4.35106	-0.469435	0.0149317
KIRC	FBRS-RI-18.2	36168	-13.5325	-24.4313	-2.63383	0.0149488
KIRC	FGFR1OP2-AT-7	20854	-2.34246	-4.23151	-0.453405	0.0150826
KIRC	ARHGAP28-AP-2	44554	0.8058	0.155597	1.456	0.0151407
KIRC	RPS16-AD-2.2	49830	-44.2569	-79.9686	-8.54521	0.0151426
KIRC	RWDD3-AT-5	3826	3.65731	0.705638	6.60898	0.0151605
KIRC	CPNE1-AD-18.3	59183	12.492	2.40385	22.5801	0.0152245
KIRC	USP4-AT-24	64850	-1.86191	-3.36556	-0.358252	0.015227
KIRC	PRPF6-ES-15	60185	-21.5426	-38.9415	-4.14378	0.0152345
KIRC	TXNDC17-AD-1.2	38768	7.26423	1.39423	13.1342	0.0152877
KIRC	USE1-AT-7	48234	-1.56028	-2.82124	-0.299315	0.0152999
KIRC	C11orf48-RI-1.2:1.3:1.4	16390	2.37693	0.455462	4.29839	0.0153273
KIRC	TSPAN31-AT-7	22724	-5.2046	-9.41581	-0.993396	0.0154223
KIRC	CAV2-AT-3	81526	-7.14374	-12.926	-1.36153	0.0154577
KIRC	MBLAC2-AT-2	72766	-3.64532	-6.59848	-0.692169	0.0155484
KIRC	ZNF675-AT-6	48820	-1.79815	-3.25496	-0.341344	0.0155546
KIRC	BCL2L11-AT-11	54951	-2.22889	-4.0362	-0.421578	0.0156425
KIRC	EIF3M-ES-2.1:2.2:3:4	14854	-17.7646	-32.175	-3.35415	0.0156851
KIRC	MRPL35-RI-4.2:4.3	54419	-1.8243	-3.30487	-0.343723	0.0157361
KIRC	CREBZF-RI-2.6:2.7	18137	4.34006	0.81725	7.86288	0.0157503
KIRC	RAPGEF6-AT-32	73230	-4.36241	-7.90557	-0.819243	0.0158156
KIRC	CRLS1-ES-5	58665	-22.133	-40.1229	-4.14311	0.0158937
KIRC	NAA38-RI-2.2	81578	2.17682	0.406753	3.94689	0.015937
KIRC	PABPN1-RI-5.2	26731	1.18122	0.218805	2.14364	0.0161477
KIRC	CD58-AT-6	4361	2.8451	0.524735	5.16546	0.0162524
KIRC	ZNF33A-AT-5.3	11309	1.97765	0.362897	3.59241	0.0163753
KIRC	PGPEP1-AT-6.2	48419	-8.37462	-15.2159	-1.53331	0.0164291
KIRC	SMUG1-RI-4.4:4.5	22125	-1.32798	-2.41435	-0.241607	0.0165815
KIRC	FKBP11-AT-8	21495	1.77358	0.322289	3.22488	0.0166107
KIRC	SLC2A1-AT-11	2140	-7.3398	-13.3479	-1.33168	0.0166483
KIRC	PHC3-AT-16	67600	-1.65801	-3.01581	-0.300217	0.0166965
KIRC	NTMT1-ES-4.1:4.2	87868	-9.69616	-17.642	-1.75036	0.0167697
KIRC	NCBP2-ES-3.2:4.1	68266	-7.91424	-14.4005	-1.42802	0.0167809
KIRC	RELL1-AT-7	69002	1.48639	0.26778	2.70501	0.0168186
KIRC	WIPF1-AT-12.3	56031	-3.26167	-5.93582	-0.587512	0.0168223
KIRC	WBP5-ES-2	89728	-4.48794	-8.16758	-0.808307	0.016825
KIRC	BCAP29-AT-12	81359	-1.62953	-2.96596	-0.293097	0.0168571
KIRC	POLR2E-AT-8	46383	6.76002	1.21553	12.3045	0.0168644
KIRC	CCDC36-AT-10.2	64847	2.13783	0.384399	3.89126	0.0168649
KIRC	ZNF330-AT-11	70665	-6.16225	-11.217	-1.1075	0.0168762
KIRC	LDB3-AT-17	12422	1.76292	0.316704	3.20914	0.0168864
KIRC	TMED4-AT-5	79538	-2.09546	-3.81501	-0.375916	0.0169201
KIRC	RPS27L-AT-6	31015	-2.20285	-4.01149	-0.394206	0.0169795
KIRC	TMEM205-AD-2.3:2.4:2.5:2.6	47659	4.18609	0.748251	7.62393	0.0170071
KIRC	CCNI-ES-2	69628	-64.0071	-116.606	-11.4082	0.0170762
KIRC	RAB6A-ES-0.213287037037037	17711	-15.7023	-28.6071	-2.79756	0.0170858
KIRC	CLSPN-AT-26	1731	1.18786	0.211467	2.16425	0.0171045
KIRC	SEC14L2-AT-12	61738	-1.3223	-2.40923	-0.235367	0.017108
KIRC	BCAT2-ES-0.170138888888889	50815	-3.09873	-5.64738	-0.550077	0.0171729
KIRC	RRBP1-ES-3.1:3.2:3.3:3.4	58739	-20.0902	-36.6282	-3.55231	0.0172676
KIRC	FBXO3-RI-12.2	14928	10.0195	1.76966	18.2693	0.0172941
KIRC	LBH-AT-5	53110	158.838	28.0392	289.638	0.0173071
KIRC	SLC50A1-AP-2	7941	-2.09632	-3.82431	-0.368332	0.017419
KIRC	TCOF1-AT-29	74068	4.39797	0.77128	8.02466	0.0174643
KIRC	C10orf32-RI-5.2	12982	10.1249	1.76522	18.4846	0.0176048
KIRC	ARHGAP6-AT-18	88479	-2.83768	-5.18081	-0.494542	0.017614
KIRC	LRPPRC-AT-39	53411	-8.12948	-14.8425	-1.41647	0.0176193
KIRC	SATB1-AT-15	63672	-5.44185	-9.93613	-0.947571	0.0176346
KIRC	MBD6-RI-13.4	22634	-6.34843	-11.5943	-1.10254	0.0176972
KIRC	DZIP3-AT-33	66034	2.81491	0.488556	5.14127	0.0177125
KIRC	SNCA-AT-8	69929	-2.05444	-3.75248	-0.356407	0.0177234
KIRC	TSHZ3-AT-3	48869	-4.93572	-9.01752	-0.85392	0.0177885
KIRC	C1QA-AP-1	1011	-7.46977	-13.6492	-1.29039	0.0178244
KIRC	OBSL1-AT-9	57728	2.66118	0.458831	4.86353	0.0178702
KIRC	FBLIM1-AT-11	772	-1.44826	-2.64849	-0.248035	0.0180299
KIRC	NAP1L1-AP-1	23467	3.25668	0.556491	5.95687	0.0180837
KIRC	PPP3CC-AT-15	83011	-7.7077	-14.1008	-1.31458	0.0181287
KIRC	ZNF248-AT-7.3	11301	2.49605	0.422559	4.56953	0.0183051
KIRC	PDSS2-AT-9	77129	-2.47594	-4.53306	-0.418816	0.0183243
KIRC	ATP5J-AT-5	60261	24.2864	4.09499	44.4778	0.0184004
KIRC	C14orf93-RI-8.2	26684	-27.9862	-51.2546	-4.71773	0.0184058
KIRC	RPS15A-RI-5.2	34253	37.7837	6.35126	69.2162	0.0184732
KIRC	SMG9-AT-14	50237	-4.80215	-8.80204	-0.80227	0.0186186
KIRC	SAT1-RI-2.2	88701	7.55527	1.25554	13.855	0.0187439
KIRC	KLC4-AT-20	76223	-9.59662	-17.6041	-1.58912	0.0188276
KIRC	SLC12A4-ES-20	37159	-18.9386	-34.7488	-3.12843	0.0188851
KIRC	NDUFC2-ES-2.1:2.2:2.3	18007	-62.4058	-114.59	-10.2214	0.0190852
KIRC	CAPS2-AT-21	23446	-1.27494	-2.34131	-0.208581	0.0191123
KIRC	SIN3B-AT-20	48215	4.24546	0.693397	7.79752	0.0191515
KIRC	DPH6-AT-10	29892	3.68462	0.599567	6.76967	0.0192386
KIRC	PMM2-AT-12	33912	69.2759	11.2195	127.332	0.0193494
KIRC	H2AFY-ME-7|8	96931	-2.58811	-4.75736	-0.418851	0.0193663
KIRC	MATR3-ES-0.339583333333333	73582	-30.3229	-55.7428	-4.90299	0.0193872
KIRC	C14orf159-AT-22	28841	-4.56342	-8.39255	-0.734298	0.0195006
KIRC	IFI27-ES-3.2	29087	-2.18836	-4.02536	-0.351361	0.0195516
KIRC	RUFY3-AT-16	69447	-3.75693	-6.91125	-0.602621	0.0195743
KIRC	SEC23A-AT-23	27347	-1.23194	-2.26656	-0.19732	0.0196081
KIRC	AIG1-AT-10	77972	-1.61966	-2.98047	-0.258863	0.0196584
KIRC	SLC2A11-AT-16	61342	-3.162	-5.8221	-0.501901	0.0198186
KIRC	ARPC1A-AT-12	80601	1.75543	0.277977	3.23288	0.0198737
KIRC	ERBB2-AT-33	40681	-36.1932	-66.6756	-5.7108	0.0199569
KIRC	TNFSF12-AT-8	38967	-2.55213	-4.7046	-0.399674	0.0201311
KIRC	OS9-AT-15	22689	-42.1758	-77.7516	-6.60005	0.0201481
KIRC	ATP6AP1-AT-11	90603	-40.6834	-75.0007	-6.366	0.0201499
KIRC	ACSM5-AT-14	34354	-1.87302	-3.45321	-0.29283	0.02017
KIRC	TM2D1-AT-8	3232	-1.54612	-2.85084	-0.241389	0.0202018
KIRC	KLHL26-AT-5.3	48497	-1.77487	-3.27269	-0.277058	0.0202056
KIRC	OSTC-ES-4	70305	1.21103	0.188809	2.23325	0.0202341
KIRC	BCKDHA-AP-2.1	50063	-1.31574	-2.42691	-0.204579	0.0202968
KIRC	CPED1-AT-26	81592	-1.33714	-2.4669	-0.207375	0.0203556
KIRC	POLR1C-ES-7	76303	-15.0478	-27.7637	-2.33182	0.0203746
KIRC	GADD45B-AT-4	46609	-5.30492	-9.78882	-0.821009	0.0204039
KIRC	GULP1-AT-15	56500	-1.1627	-2.14584	-0.179566	0.0204524
KIRC	NAP1L1-RI-14.2	23474	-1.66912	-3.08274	-0.255507	0.0206556
KIRC	GLIPR1L2-AT-6.2	23458	1.95345	0.29825	3.60866	0.0207156
KIRC	POLDIP3-AT-10.2	62521	-15.5	-28.6526	-2.34745	0.0209006
KIRC	ATPIF1-RI-2.2:2.3	1381	-3.09296	-5.71752	-0.468405	0.0209015
KIRC	PIN1-RI-4.2	47442	-29.4413	-54.4246	-4.45798	0.020905
KIRC	SLC31A1-AT-5.2	87261	-4.02001	-7.43294	-0.607078	0.0209661
KIRC	DOCK9-AT-60	26175	-2.98829	-5.5255	-0.451082	0.0209758
KIRC	CSNK1D-AT-12	44307	-33.1225	-61.2584	-4.9867	0.0210358
KIRC	IL32-ES-2.4	33377	4.3874	0.659776	8.11503	0.021062
KIRC	PET100-AT-4	47118	-3.34324	-6.18456	-0.501915	0.0211001
KIRC	TMOD3-AT-11.6	30631	-56.6486	-104.817	-8.47983	0.0211664
KIRC	TBCA-ES-4	72606	-246.846	-456.788	-36.9041	0.0211951
KIRC	ZNF772-AT-5	52253	2.64029	0.394703	4.88588	0.0211966
KIRC	UPB1-AT-12	61404	-1.02018	-1.88796	-0.152406	0.021212
KIRC	GPRC5B-AA-6.1	34346	-121.982	-225.831	-18.1333	0.0213241
KIRC	IRF9-AT-10	26875	-8.06023	-14.9238	-1.1967	0.0213524
KIRC	R3HDM4-AT-9	46344	-77.3339	-143.192	-11.4762	0.0213632
KIRC	PCMTD2-AT-6	60202	-1.6517	-3.05946	-0.243945	0.021471
KIRC	C2orf68-AT-3	54308	-1.65817	-3.07232	-0.244022	0.021552
KIRC	RASSF8-AT-8	20839	-1.27748	-2.3672	-0.187762	0.0215804
KIRC	RBM4-AP-2.1	17089	-3.1964	-5.92327	-0.469536	0.0215932
KIRC	PGM3-RI-15.2	76864	5.95909	0.872763	11.0454	0.0216602
KIRC	ERP29-ES-3	24569	6.0397	0.882993	11.1964	0.0217003
KIRC	TMBIM6-AA-7.1	21612	181.623	26.5347	336.71	0.0217157
KIRC	BBS9-AT-26	79219	-4.56027	-8.45962	-0.660908	0.0218963
KIRC	ACYP1-AT-6	28476	2.64985	0.381757	4.91794	0.0220296
KIRC	ANKDD1A-AT-16	31138	-1.50468	-2.79493	-0.214424	0.0222726
KIRC	POLR2J2-AA-3.1:3.2	81128	1.04886	0.149461	1.94825	0.0222736
KIRC	SSR1-AT-11.2	75254	-2.11064	-3.92274	-0.298536	0.0224386
KIRC	UBA52-RI-7.2	48473	32.6258	4.59953	60.6521	0.0225116
KIRC	PXK-AT-20	65435	-3.30406	-6.14264	-0.465478	0.0225269
KIRC	CEP41-ES-12	81798	2.12977	0.299832	3.95971	0.0225425
KIRC	UGT1A1-AT-10	58054	1.28611	0.179903	2.39231	0.022684
KIRC	CRAT-AT-16	87825	-4.66026	-8.66942	-0.651094	0.0227108
KIRC	C19orf53-AP-1	47934	-5.81721	-10.8228	-0.811606	0.0227414
KIRC	KALRN-AT-52.3	66523	1.1117	0.154697	2.06871	0.022799
KIRC	CCDC144A-AT-28	39440	2.6023	0.361822	4.84277	0.022817
KIRC	SLC24A1-AT-13	31232	2.51776	0.349893	4.68563	0.022828
KIRC	GOLGA3-AT-24	25306	-5.49421	-10.2289	-0.75955	0.0229427
KIRC	KLC1-AA-13.1	29491	6.5215	0.90152	12.1415	0.0229438
KIRC	MRPL49-ES-3.1:3.3:3.4:3.5	16786	28.8666	3.98131	53.7518	0.0229941
KIRC	MRPL10-AP-1.1	42098	-1.0792	-2.01058	-0.14782	0.0231451
KIRC	AP1M1-ES-0.00142476851851852	48149	-297.673	-554.652	-40.695	0.0231868
KIRC	L2HGDH-RI-13.2	27461	1.35323	0.182971	2.52349	0.0234265
KIRC	WDR81-AP-3.1	38362	-5.16826	-9.64072	-0.695804	0.0235197
KIRC	COA5-AT-4	54639	-1.66135	-3.09927	-0.223433	0.0235424
KIRC	COG8-AT-6	37279	-2.61354	-4.87597	-0.351108	0.023566
KIRC	PKP4-AT-27	55679	68.7202	9.19503	128.245	0.0236526
KIRC	RBM4-ES-4.1	17096	-2.04359	-3.81402	-0.273156	0.023675
KIRC	CERS4-ES-0.424305555555556	47206	-16.5506	-30.8931	-2.20803	0.0237159
KIRC	CCDC159-ES-0.339699074074074	47684	-17.6152	-32.9014	-2.3289	0.0239102
KIRC	RAPGEF3-AT-30	21352	-1.58029	-2.95293	-0.207649	0.0240417
KIRC	PPIL2-RI-22.3:22.4	61238	-15.166	-28.3506	-1.98142	0.024164
KIRC	LGALS1-ES-3	62146	141.047	18.4247	263.669	0.0241673
KIRC	CNDP2-ES-0.2125	45814	-41.1116	-76.8596	-5.36352	0.0241943
KIRC	PDLIM7-AT-15	74778	-1.97964	-3.70229	-0.256987	0.0242999
KIRC	DBI-ES-3.1:3.2	55117	-10.1816	-19.0517	-1.31145	0.0244651
KIRC	PBDC1-ES-5	89529	-6.79905	-12.7252	-0.8729	0.0245342
KIRC	NDUFA13-AA-2.1	48652	46.8549	6.0052	87.7046	0.0245703
KIRC	SLC47A1-RI-18.4	39735	-28.3005	-53.0261	-3.57484	0.0248752
KIRC	ISCU-AT-6	24221	-12.9988	-24.3591	-1.63845	0.02492
KIRC	GPX3-ES-2	74125	4.25474	0.534867	7.97462	0.0249756
KIRC	SPCS2-ES-0.00283680555555556	17803	-48.697	-91.2906	-6.10345	0.0250379
KIRC	ITGB1BP1-RI-8.2	52616	4.7547	0.595725	8.91367	0.0250451
KIRC	EIF3M-ES-0.127777777777778	14851	-88.6601	-166.265	-11.0548	0.0251456
KIRC	ATP11B-AT-30	67765	-8.97508	-16.8362	-1.11396	0.0252406
KIRC	EXOSC9-AD-10.2:10.3	70504	3.12915	0.387052	5.87126	0.0253115
KIRC	ZNF773-AT-4	52279	-1.71205	-3.21253	-0.211559	0.0253317
KIRC	DDX42-AT-20	42988	-24.1581	-45.3357	-2.98043	0.0253649
KIRC	SEC16A-AP-1	88169	-1.45249	-2.72746	-0.177518	0.0255585
KIRC	PTGIR-AT-4.2	50569	0.963578	0.117412	1.80974	0.02562
KIRC	SSH1-AT-16	24255	-2.5855	-4.85601	-0.314988	0.0256235
KIRC	WDPCP-AT-19	53729	3.39538	0.413418	6.37735	0.0256353
KIRC	TAF9-AT-4	72346	-3.12055	-5.86334	-0.377758	0.0257537
KIRC	RPL23-AP-1	40601	-60.2506	-113.288	-7.21365	0.0259779
KIRC	MDM1-AT-14	22922	2.08533	0.248643	3.92203	0.0260614
KIRC	TCF7-AT-14.2	73339	-4.26623	-8.02398	-0.508476	0.0260695
KIRC	TGOLN2-AT-4.3	54192	-6.56633	-12.3505	-0.782127	0.0260822
KIRC	PKMYT1-AT-10	33327	-2.00683	-3.77499	-0.238676	0.0261128
KIRC	CFI-AT-14	70339	5.81331	0.690447	10.9362	0.0261402
KIRC	SKP2-AA-10.1	71798	-2.00104	-3.76542	-0.236648	0.0262263
KIRC	WDR92-AT-8	53824	-5.10796	-9.6127	-0.603211	0.0262553
KIRC	INO80C-AA-4.1	45175	2.70078	0.318059	5.08351	0.026311
KIRC	PAFAH1B1-ES-10	38408	-30.8541	-58.0946	-3.61354	0.0264215
KIRC	CCDC132-AT-30	80455	-1.24491	-2.3442	-0.145616	0.0264468
KIRC	SRI-AT-10	80357	-1.62212	-3.05463	-0.189611	0.0264602
KIRC	EARS2-RI-11.2	35597	-3.51553	-6.62107	-0.40999	0.026506
KIRC	PEX13-AT-5	53681	-2.37529	-4.47373	-0.276846	0.026518
KIRC	GCSH-AT-6	37754	-18.3017	-34.478	-2.12546	0.0265896
KIRC	SFMBT2-AT-24	10710	-2.41242	-4.54546	-0.279376	0.0266456
KIRC	SDCCAG8-AT-19	10456	-6.03844	-11.3806	-0.69632	0.0267301
KIRC	PMS2-ES-4	78701	-3.34995	-6.31412	-0.385783	0.0267566
KIRC	TINF2-RI-6.2	26933	-2.63797	-4.97422	-0.301723	0.0268914
KIRC	CLPP-ES-4	47025	-49.2177	-92.8608	-5.5746	0.0270834
KIRC	CD99-AT-13	88409	33.3947	3.77643	63.0129	0.0271145
KIRC	NRP1-AT-20	11198	-2.37322	-4.47932	-0.267116	0.0272063
KIRC	LYRM4-AT-7	75241	-2.18084	-4.11688	-0.244804	0.0272587
KIRC	DUSP22-RI-7.4	75130	-1.94163	-3.66547	-0.217793	0.0272729
KIRC	ORMDL2-AA-3.1	22257	-25.4382	-48.0299	-2.84648	0.0273201
KIRC	DYNC1I1-AT-19	80544	-1.33228	-2.51602	-0.148531	0.0273916
KIRC	FRA10AC1-AT-17	12559	-6.35651	-12.014	-0.698964	0.0276576
KIRC	GFM1-AT-19	67446	-26.6501	-50.3706	-2.92972	0.0276625
KIRC	HM13-ES-12.1:12.2	58890	6.52029	0.716777	12.3238	0.0276629
KIRC	TPT1-AT-5	25795	-75.1739	-142.091	-8.25651	0.02768
KIRC	POLR2J3-AA-4.1:4.2	81117	1.02215	0.112264	1.93204	0.0276803
KIRC	IFT74-AT-23	86041	4.33382	0.47009	8.19755	0.0279186
KIRC	ELP2-AA-20.1	45217	-14.1195	-26.708	-1.53109	0.0279243
KIRC	PLEKHB2-AT-10	55370	30.9585	3.35012	58.5668	0.0279637
KIRC	CEP76-AT-9.2	44706	1.23664	0.13306	2.34022	0.0280719
KIRC	SLC10A7-AT-14	70771	-2.95661	-5.59539	-0.317834	0.0280893
KIRC	MAF-AT-1.3	37686	8.63603	0.917155	16.3549	0.0283184
KIRC	CAMTA1-AT-5	502	2.81539	0.298893	5.33188	0.028325
KIRC	ZCCHC10-AT-6.2	73327	-1.11728	-2.11615	-0.118408	0.0283577
KIRC	CUBN-AT-67	10882	-15.824	-29.9875	-1.66055	0.0285422
KIRC	ABR-ES-23.2:24:25:26:27.1	38291	-8.99338	-17.044	-0.942794	0.028561
KIRC	KXD1-AT-8.4	48457	-26.3932	-50.0196	-2.76682	0.0285612
KIRC	CLIC4-RI-6.2	1134	271.204	28.4232	513.984	0.028566
KIRC	C17orf104-AT-8	41878	-1.00108	-1.89736	-0.104793	0.0285879
KIRC	CBR4-AT-6	71137	-2.51305	-4.76503	-0.261078	0.0287288
KIRC	EMC3-AT-9	63298	-5.46098	-10.3563	-0.565613	0.0287849
KIRC	FAM193A-ES-22	68579	1.20722	0.124709	2.28973	0.0288333
KIRC	SMCHD1-AT-49	44483	-62.3071	-118.179	-6.43473	0.0288383
KIRC	ALDH1A3-AT-13	32741	-6.88679	-13.065	-0.708582	0.0289069
KIRC	AKR1C1-AT-16	10645	-2.51589	-4.77543	-0.256361	0.0290847
KIRC	DBT-AT-11	3874	-6.84362	-12.9905	-0.696705	0.0291014
KIRC	C9orf9-RI-5.2	87994	-1.74527	-3.31339	-0.177155	0.0291549
KIRC	HM13-ES-6	58895	-38.4693	-73.0453	-3.89332	0.0292086
KIRC	GORAB-AT-5	8967	-10.3142	-19.5908	-1.03769	0.0293162
KIRC	RPS23-RI-3.5:3.6	72691	67.0217	6.66236	127.381	0.0295327
KIRC	SH3GLB2-RI-14.2	87808	-16.5205	-31.4036	-1.63738	0.0295859
KIRC	GNPTAB-AT-22	24003	17.5203	1.72699	33.3136	0.0296837
KIRC	IL7R-AT-8	71774	-2.75436	-5.23917	-0.269555	0.0298117
KIRC	FANCI-AT-40	32416	-11.0562	-21.036	-1.07636	0.0299045
KIRC	ZSCAN9-AT-5	75720	2.71918	0.263864	5.17449	0.0299619
KIRC	CEP104-AT-23	339	-12.3841	-23.5887	-1.17957	0.0302882
KIRC	MFSD12-ES-14	46699	-1.02981	-1.96157	-0.0980371	0.0302971
KIRC	NDUFB3-ES-2.1:2.2	56781	20.3969	1.91879	38.8751	0.0305036
KIRC	IP6K2-AT-15	64742	-1.47004	-2.80326	-0.136815	0.030688
KIRC	CLDN11-AT-3	67616	0.864265	0.0802122	1.64832	0.0307357
KIRC	CCDC23-RI-4.2	2120	-24.5034	-46.7417	-2.2651	0.0308039
KIRC	WBP2-ES-3	43522	1.3176	0.121775	2.51343	0.0308073
KIRC	STX18-AT-11	68684	-15.0836	-28.7749	-1.39222	0.0308296
KIRC	FBXO10-AT-12	86409	-3.04577	-5.81078	-0.280764	0.0308515
KIRC	PML-AT-8	31628	-2.06328	-3.93838	-0.188167	0.0310332
KIRC	RBM19-RI-24.2	24647	1.83347	0.16712	3.49982	0.0310422
KIRC	PRRX1-AT-5	8968	4.93992	0.449379	9.43047	0.0310757
KIRC	TRIO-AT-60	71584	4.83994	0.439163	9.24072	0.0311186
KIRC	KLHL5-AT-12	69042	-1.52818	-2.91792	-0.138438	0.0311459
KIRC	LARP4-AT-17	21700	-3.74681	-7.15589	-0.337735	0.0312295
KIRC	SNRNP27-RI-6.2	53861	-1.73412	-3.3123	-0.155936	0.0312697
KIRC	S100PBP-AT-9	1635	-1.34973	-2.5781	-0.121365	0.0312706
KIRC	DCTN6-ES-0.127777777777778	83282	7.87773	0.6995	15.056	0.0314796
KIRC	PGM2-AT-14	69004	-3.87862	-7.41688	-0.340364	0.0316738
KIRC	TNIP1-ES-18	74139	-36.9418	-70.6609	-3.22274	0.0317702
KIRC	ATP5C1-AT-10	10725	-16.7158	-31.9768	-1.45485	0.0318085
KIRC	POLR2M-AT-16	30876	-12.5823	-24.0712	-1.09351	0.031832
KIRC	RAB3GAP1-AT-27.4	55429	-2.3482	-4.49411	-0.202295	0.0319745
KIRC	MAPK12-AT-13	62810	-3.71296	-7.10678	-0.319133	0.0320116
KIRC	BAX-ES-3	50838	-43.5095	-83.282	-3.737	0.0320232
KIRC	FTH1-AA-4.1	16332	-280.343	-536.679	-24.007	0.0320711
KIRC	ZMYM5-AT-8	25405	-2.28721	-4.37925	-0.195182	0.0321272
[truncated: 3,257 more rows]
